# Supplementary material for: Human Brain Proteome-wide Association Study Provides Insights into the Genetic Components of Protein Abundance in Obesity
Source: Research Square preprint supplement (doi:10.21203/rs.3.rs-3975196/v1), 2024-03-04
Supplement: Supplementary file 1 [file 006bc7372e08e2b87bbfcb17.docx]

**Supplementary Table 6: Proteome-wide Significant Genes for Waist-hip Ratio**

| **Gene** | **CHR** | **Position** | **ROSMAP (Discovery)** | | | | | | | | **BANNER (Replication)** | | | | | | | |
| --- | --- | --- | --- | --- | --- | --- | --- | --- | --- | --- | --- | --- | --- | --- | --- | --- | --- | --- |
| **HSQ** | **PWAS.Z** | **PWAS.P** | **COLOC.PP0** | **COLOC.PP1** | **COLOC.PP2** | **COLOC.PP3** | **COLOC.PP4** | **HSQ** | **PWAS.Z** | **PWAS.P** | **COLOC.PP0** | **COLOC.PP1** | **COLOC.PP2** | **COLOC.PP3** | **COLOC.PP4** |
| ***CCDC92*** | 12 | 124403207~124457378 | 0.064 | 15.228 | 2.30E-52 | 0.000 | 0.000 | 0.000 | 0.048 | 0.952 | 0.450 | 13.968 | **2.44E-44** | 0.000 | 0.000 | 0.000 | 0.144 | **0.856** |
| *DOC2A* | 16 | 30016830~30034591 | 0.062 | 8.297 | 1.06E-16 | 0.000 | 0.000 | 0.000 | 0.046 | 0.954 | 0.066 | 6.963 | 3.34E-12 | 0.000 | 0.000 | 0.253 | 0.101 | 0.646 |
| *MON1A* | 3 | 49946302~49967606 | 0.020 | -7.807 | 5.87E-15 | 0.000 | 0.000 | 0.592 | 0.053 | 0.355 | - | - | - | - | - | - | - | - |
| *TMEM175* | 4 | 926175~952444 | 0.065 | -7.762 | 8.35E-15 | 0.000 | 0.000 | 0.095 | 0.005 | 0.900 | - | - | - | - | - | - | - | - |
| *SCYL1* | 11 | 65292548~65306175 | 0.043 | 7.165 | 7.80E-13 | 0.000 | 0.000 | 0.124 | 0.014 | 0.862 | - | - | - | - | - | - | - | - |
| *VASN* | 16 | 4421849~4433529 | 0.045 | -7.015 | 2.31E-12 | 0.000 | 0.000 | 0.136 | 0.053 | 0.811 | - | - | - | - | - | - | - | - |
| *PDE4C* | 19 | 18318771~18366229 | 0.100 | -6.887 | 5.72E-12 | 0.000 | 0.000 | 0.030 | 0.955 | 0.015 | - | - | - | - | - | - | - | - |
| *DNM3* | 1 | 171810621~172387606 | 0.125 | 6.867 | 6.58E-12 | 0.000 | 0.000 | 0.000 | 0.135 | 0.864 | - | - | - | - | - | - | - | - |
| ***B3GAT3*** | 11 | 62382768~62389647 | 0.083 | -6.860 | 6.87E-12 | 0.000 | 0.000 | 0.003 | 0.130 | 0.867 | 0.176 | -6.858 | **6.96E-12** | 0.000 | 0.000 | 0.027 | 0.072 | **0.901** |
| *AAGAB* | 15 | 67493371~67547533 | 0.052 | 6.792 | 1.11E-11 | 0.000 | 0.000 | 0.004 | 0.053 | 0.944 | - | - | - | - | - | - | - | - |
| *NSF* | 17 | 44668035~44834830 | 0.198 | 6.759 | 1.39E-11 | 0.000 | 0.000 | 0.142 | 0.371 | 0.487 | - | - | - | - | - | - | - | - |
| *ASPHD1* | 16 | 29911696~29931185 | 0.300 | 6.692 | 2.20E-11 | 0.000 | 0.000 | 0.000 | 1.000 | 0.000 | - | - | - | - | - | - | - | - |
| ***SULT1A1*** | 16 | 28616903~28634946 | 0.361 | -6.679 | 2.41E-11 | 0.000 | 0.000 | 0.000 | 0.057 | 0.943 | 0.297 | -8.284 | **1.19E-16** | 0.000 | 0.000 | 0.000 | 0.013 | **0.987** |
| *PLXND1* | 3 | 129274018~129325661 | 0.231 | 6.472 | 9.66E-11 | 0.000 | 0.000 | 0.489 | 0.075 | 0.436 | - | - | - | - | - | - | - | - |
| *CNTN2* | 1 | 205012325~205047627 | 0.074 | -6.323 | 2.56E-10 | 0.000 | 0.000 | 0.005 | 0.067 | 0.928 | 0.120 | -5.628 | 1.82E-08 | 0.000 | 0.000 | 0.453 | 0.033 | 0.514 |
| *RFT1* | 3 | 53122499~53164478 | 0.145 | -6.216 | 5.09E-10 | 0.000 | 0.000 | 0.000 | 0.379 | 0.621 | - | - | - | - | - | - | - | - |
| *HLA* | 6 | 31321649~31324965 | 0.195 | -5.991 | 2.08E-09 | 0.000 | 0.000 | 0.000 | 0.012 | 0.988 | 0.256 | 6.067 | 1.31E-09 | 0.000 | 0.000 | 0.860 | 0.095 | 0.044 |
| *EML2* | 19 | 46110252~46148887 | 0.104 | -5.968 | 2.41E-09 | 0.000 | 0.000 | 0.000 | 1.000 | 0.000 | - | - | - | - | - | - | - | - |
| *SKIV2L* | 6 | 31926857~31937532 | 0.103 | 5.886 | 3.96E-09 | 0.000 | 0.000 | 0.236 | 0.182 | 0.582 | - | - | - | - | - | - | - | - |
| *TYW5* | 2 | 200794698~200820459 | 0.025 | 5.883 | 4.03E-09 | 0.000 | 0.000 | 0.076 | 0.016 | 0.908 | - | - | - | - | - | - | - | - |
| *FAIM* | 3 | 138327448~138352218 | 0.065 | -5.877 | 4.18E-09 | 0.000 | 0.000 | 0.011 | 0.007 | 0.982 | - | - | - | - | - | - | - | - |
| ***SNX32*** | 11 | 65601112~65624367 | 0.285 | 5.850 | 4.92E-09 | 0.000 | 0.001 | 0.000 | 0.059 | 0.940 | 0.342 | 4.917 | **8.81E-07** | 0.000 | 0.000 | 0.000 | 0.031 | **0.968** |
| *TKT* | 3 | 53258723~53290068 | 0.178 | 5.773 | 7.79E-09 | 0.000 | 0.000 | 0.000 | 0.921 | 0.079 | - | - | - | - | - | - | - | - |
| *PIH1D1* | 19 | 49949555~49956754 | 0.075 | -5.579 | 2.42E-08 | 0.057 | 0.439 | 0.004 | 0.033 | 0.468 | - | - | - | - | - | - | - | - |
| *TOM1L2* | 17 | 17746828~17875736 | 0.113 | -5.534 | 3.13E-08 | 0.000 | 0.000 | 0.000 | 0.665 | 0.335 | - | - | - | - | - | - | - | - |
| ***CAND2*** | 3 | 12837971~12913415 | 0.581 | -5.485 | 4.14E-08 | 0.000 | 0.000 | 0.000 | 0.051 | 0.949 | 0.476 | -6.052 | **1.43E-09** | 0.000 | 0.000 | 0.000 | 0.030 | **0.970** |
| *RWDD1* | 6 | 116892530~116918838 | 0.065 | -5.437 | 5.41E-08 | 0.000 | 0.002 | 0.000 | 0.013 | 0.984 | - | - | - | - | - | - | - | - |
| *VWA7* | 6 | 31733367~31745108 | 0.683 | 5.385 | 7.25E-08 | 0.000 | 0.000 | 0.010 | 0.159 | 0.831 | - | - | - | - | - | - | - | - |
| *TBC1D10A* | 22 | 30687979~30723035 | 0.042 | -5.324 | 1.02E-07 | 0.129 | 0.008 | 0.423 | 0.027 | 0.414 | - | - | - | - | - | - | - | - |
| *LUZP1* | 1 | 23410516~23504301 | 0.088 | 5.321 | 1.03E-07 | 0.000 | 0.000 | 0.012 | 0.037 | 0.951 | - | - | - | - | - | - | - | - |
| *SLC9A3R2* | 16 | 2075357~2089027 | 0.094 | 5.291 | 1.22E-07 | 0.000 | 0.000 | 0.001 | 0.002 | 0.996 | - | - | - | - | - | - | - | - |
| *C15orf57* | 15 | 40820882~40857256 | 0.103 | -5.225 | 1.74E-07 | 0.001 | 0.008 | 0.001 | 0.007 | 0.983 | - | - | - | - | - | - | - | - |
| *MAP2K2* | 19 | 4090319~4124126 | 0.048 | -5.183 | 2.18E-07 | 0.037 | 0.005 | 0.670 | 0.083 | 0.205 | - | - | - | - | - | - | - | - |
| *ULK3* | 15 | 75128457~75135687 | 0.347 | -5.114 | 3.15E-07 | 0.000 | 0.003 | 0.000 | 0.421 | 0.575 | - | - | - | - | - | - | - | - |
| *PPCDC* | 15 | 75315896~75409803 | 0.071 | -5.073 | 3.91E-07 | 0.007 | 0.006 | 0.007 | 0.005 | 0.975 | - | - | - | - | - | - | - | - |
| ***HSD17B12*** | 11 | 43577986~43878167 | 0.325 | -4.962 | 6.97E-07 | 0.000 | 0.000 | 0.000 | 0.121 | 0.879 | 0.554 | -4.391 | **1.13E-05** | 0.000 | 0.000 | 0.000 | 0.178 | **0.822** |
| *ADCY3* | 2 | 25042038~25142708 | 0.074 | -4.959 | 7.10E-07 | 0.000 | 0.000 | 0.122 | 0.072 | 0.806 | 0.129 | -6.459 | 1.05E-10 | 0.000 | 0.000 | 0.227 | 0.062 | 0.711 |
| *PDCD6IP* | 3 | 33839844~33911194 | 0.036 | -4.941 | 7.77E-07 | 0.001 | 0.000 | 0.282 | 0.013 | 0.705 | - | - | - | - | - | - | - | - |
| *CAPN2* | 1 | 223889295~223963720 | 0.123 | 4.889 | 1.01E-06 | 0.000 | 0.000 | 0.000 | 0.023 | 0.976 | - | - | - | - | - | - | - | - |
| ***SHMT1*** | 17 | 18231187~18266856 | 0.387 | -4.882 | 1.05E-06 | 0.000 | 0.004 | 0.000 | 0.003 | 0.993 | 0.305 | -5.179 | **2.23E-07** | 0.000 | 0.010 | 0.000 | 0.010 | **0.980** |
| *FAM162B* | 6 | 117073363~117086886 | 0.310 | 4.794 | 1.64E-06 | 0.000 | 0.212 | 0.000 | 0.017 | 0.771 | - | - | - | - | - | - | - | - |
| *RPAP1* | 15 | 41809374~41836467 | 0.083 | -4.707 | 2.52E-06 | 0.000 | 0.000 | 0.084 | 0.052 | 0.864 | 0.532 | -0.288 | 7.73E-01 | - | - | - | - | - |
| ***MECR*** | 1 | 29519385~29557454 | 0.298 | -4.703 | 2.56E-06 | 0.000 | 0.052 | 0.000 | 0.018 | 0.930 | 0.478 | -3.727 | **1.93E-04** | 0.001 | 0.063 | 0.000 | 0.022 | **0.913** |
| *OPA3* | 19 | 46030685~46105470 | 0.030 | -4.703 | 2.57E-06 | 0.000 | 0.000 | 0.901 | 0.068 | 0.031 | - | - | - | - | - | - | - | - |
| ***JMJD7*** | 15 | 42120283~42129779 | 0.107 | 4.679 | 2.89E-06 | 0.000 | 0.000 | 0.000 | 0.003 | 0.997 | 0.171 | 4.085 | **4.41E-05** | 0.000 | 0.000 | 0.020 | 0.088 | **0.892** |
| ***ANXA5*** | 4 | 122589110~122618268 | 0.285 | 4.669 | 3.03E-06 | 0.000 | 0.009 | 0.000 | 0.031 | 0.960 | 0.478 | 4.682 | **2.84E-06** | 0.000 | 0.008 | 0.000 | 0.028 | **0.964** |
| ***DAGLB*** | 7 | 6448757~6523821 | 0.161 | -4.589 | 4.45E-06 | 0.000 | 0.007 | 0.000 | 0.005 | 0.988 | 0.230 | -4.493 | **7.03E-06** | 0.001 | 0.021 | 0.001 | 0.015 | **0.962** |
| *PAM* | 5 | 102089685~102366809 | 0.048 | -4.576 | 4.74E-06 | 0.109 | 0.009 | 0.362 | 0.028 | 0.492 | - | - | - | - | - | - | - | - |
| *TUBA4A* | 2 | 220114433~220142892 | 0.024 | 4.573 | 4.81E-06 | 0.783 | 0.086 | 0.026 | 0.003 | 0.102 | - | - | - | - | - | - | - | - |
| *MGMT* | 10 | 131265448~131566271 | 0.609 | 4.567 | 4.94E-06 | 0.000 | 0.531 | 0.000 | 0.134 | 0.335 | - | - | - | - | - | - | - | - |
| *SENP8* | 15 | 72406599~72433311 | 0.126 | 4.565 | 4.99E-06 | 0.007 | 0.661 | 0.000 | 0.023 | 0.309 | - | - | - | - | - | - | - | - |
| *DSTYK* | 1 | 205111632~205180727 | 0.044 | -4.559 | 5.14E-06 | 0.000 | 0.000 | 0.226 | 0.084 | 0.690 | - | - | - | - | - | - | - | - |
| *ARNT2* | 15 | 80696692~80890278 | 0.058 | -4.544 | 5.52E-06 | 0.003 | 0.042 | 0.011 | 0.175 | 0.769 | - | - | - | - | - | - | - | - |
| *PLEKHG3* | 14 | 65170820~65213610 | 0.087 | 4.540 | 5.62E-06 | 0.822 | 0.017 | 0.148 | 0.003 | 0.009 | - | - | - | - | - | - | - | - |
| *MKRN2* | 3 | 12598513~12625212 | 0.180 | -4.522 | 6.13E-06 | 0.000 | 0.000 | 0.005 | 0.988 | 0.008 | - | - | - | - | - | - | - | - |
| *HTT* | 4 | 3076408~3245676 | 0.048 | -4.515 | 6.32E-06 | 0.000 | 0.000 | 0.084 | 0.015 | 0.901 | - | - | - | - | - | - | - | - |
| *BCL2L13* | 22 | 18111621~18213388 | 0.204 | -4.470 | 7.84E-06 | 0.000 | 0.463 | 0.000 | 0.007 | 0.530 | - | - | - | - | - | - | - | - |
| *CAMKK2* | 12 | 121675497~121736111 | 0.176 | -4.467 | 7.91E-06 | 0.000 | 0.005 | 0.004 | 0.095 | 0.895 | 0.232 | 4.911 | 9.07E-07 | 0.013 | 0.020 | 0.243 | 0.371 | 0.353 |
| *PHF3* | 6 | 64345725~64489229 | 0.052 | 4.433 | 9.28E-06 | 0.146 | 0.006 | 0.108 | 0.003 | 0.736 | - | - | - | - | - | - | - | - |
| *RGS6* | 14 | 72399156~73030654 | 0.183 | 4.430 | 9.43E-06 | 0.000 | 0.925 | 0.000 | 0.047 | 0.028 | - | - | - | - | - | - | - | - |
| *APMAP* | 20 | 24943561~24973615 | 0.038 | 4.421 | 9.81E-06 | 0.041 | 0.053 | 0.057 | 0.073 | 0.776 | - | - | - | - | - | - | - | - |
| *ABHD12* | 20 | 25275379~25371619 | 0.396 | 4.404 | 1.06E-05 | 0.000 | 0.005 | 0.000 | 0.994 | 0.001 | - | - | - | - | - | - | - | - |
| *MPI* | 15 | 75182346~75191798 | 0.175 | 4.400 | 1.08E-05 | 0.000 | 0.052 | 0.000 | 0.585 | 0.362 | - | - | - | - | - | - | - | - |
| *PNKD* | 2 | 219135115~219211516 | 0.040 | 4.366 | 1.27E-05 | 0.000 | 0.000 | 0.021 | 0.024 | 0.955 | - | - | - | - | - | - | - | - |
| *LY6H* | 8 | 144239331~144242128 | 0.125 | 4.327 | 1.51E-05 | 0.000 | 0.021 | 0.000 | 0.006 | 0.973 | - | - | - | - | - | - | - | - |
| *AAMDC* | 11 | 77532155~77629478 | 0.412 | -4.321 | 1.56E-05 | 0.000 | 0.266 | 0.000 | 0.018 | 0.716 | - | - | - | - | - | - | - | - |
| *FTO* | 16 | 53737875~54155853 | 0.131 | 4.281 | 1.86E-05 | 0.000 | 0.000 | 0.574 | 0.401 | 0.024 | - | - | - | - | - | - | - | - |
| *TMEM106B* | 7 | 12250867~12282993 | 0.238 | -4.266 | 1.99E-05 | 0.000 | 0.237 | 0.000 | 0.012 | 0.751 | - | - | - | - | - | - | - | - |
| *LYZ* | 12 | 69742121~69748014 | 0.034 | 4.230 | 2.34E-05 | 0.019 | 0.006 | 0.353 | 0.112 | 0.510 | - | - | - | - | - | - | - | - |
| *MADD* | 11 | 47290712~47351582 | 0.368 | 4.224 | 2.40E-05 | 0.000 | 0.000 | 0.000 | 1.000 | 0.000 | - | - | - | - | - | - | - | - |
| *KIF21B* | 1 | 200938520~200992828 | 0.258 | 4.212 | 2.53E-05 | 0.000 | 0.792 | 0.000 | 0.011 | 0.197 | - | - | - | - | - | - | - | - |
| *SBF2* | 11 | 9800214~10315754 | 0.065 | -4.201 | 2.66E-05 | 0.001 | 0.000 | 0.627 | 0.090 | 0.282 | - | - | - | - | - | - | - | - |
| *SMUG1* | 12 | 54558529~54582778 | 0.086 | -4.200 | 2.67E-05 | 0.001 | 0.004 | 0.008 | 0.020 | 0.968 | - | - | - | - | - | - | - | - |

HSQ: Heritability of the gene; "-": The brain protein-coding gene is not available in the replication cohort. The bonferroni correction threshold for discovery cohort is P < 0.05/1751 = 2.856 × 10-5. The bonferroni correction threshold for replication cohort is P < 0.05/17 = 2.941 × 10-3. The bolded genes represent the successfully replicated brain protein-coding genes.
