# Supplementary material for: Human Brain Proteome-wide Association Study Provides Insights into the Genetic Components of Protein Abundance in Obesity
Source: Research Square preprint supplement (doi:10.21203/rs.3.rs-3975196/v1), 2024-03-04
Supplement: Supplementary file 2 [file 11aa468c7d7adac6e304dac6.docx]

**Supplementary Table 4: Proteome-wide Significant Genes for Visceral Adipose Tissue**

| **Gene** | **CHR** | **Position** | **ROSMAP (Discovery)** | | | | | | | | **BANNER (Replication)** | | | | | | | |
| --- | --- | --- | --- | --- | --- | --- | --- | --- | --- | --- | --- | --- | --- | --- | --- | --- | --- | --- |
| **HSQ** | **PWAS.Z** | **PWAS.P** | **COLOC.PP0** | **COLOC.PP1** | **COLOC.PP2** | **COLOC.PP3** | **COLOC.PP4** | **HSQ** | **PWAS.Z** | **PWAS.P** | **COLOC.PP0** | **COLOC.PP1** | **COLOC.PP2** | **COLOC.PP3** | **COLOC.PP4** |
| *MON1A* | 3 | 49946302~49967606 | 0.020 | -10.599 | 3.02E-26 | 0.000 | 0.000 | 0.492 | 0.044 | 0.464 | - | - | - | - | - | - | - | - |
| *DOC2A* | 16 | 30016830~30034591 | 0.062 | 10.296 | 7.33E-25 | 0.000 | 0.000 | 0.000 | 0.157 | 0.843 | 0.066 | 9.351 | 8.65E-21 | 0.000 | 0.000 | 0.306 | 0.122 | 0.572 |
| ***ADCY3*** | 2 | 25042038~25142708 | 0.074 | -8.938 | 3.96E-19 | 0.000 | 0.000 | 0.037 | 0.021 | 0.941 | 0.129 | -10.372 | **3.34E-25** | 0.000 | 0.000 | 0.041 | 0.010 | **0.949** |
| *SULT1A1* | 16 | 28616903~28634946 | 0.361 | -8.208 | 2.25E-16 | 0.000 | 0.000 | 0.000 | 0.166 | 0.834 | 0.297 | -9.374 | 6.96E-21 | 0.000 | 0.000 | 0.000 | 0.225 | 0.775 |
| *LMOD1* | 1 | 201865580~201915715 | 0.049 | -7.368 | 1.73E-13 | 0.000 | 0.000 | 0.085 | 0.016 | 0.899 | 0.306 | -5.364 | 8.13E-08 | 0.000 | 0.000 | 0.310 | 0.164 | 0.527 |
| ***MAP2K2*** | 19 | 4090319~4124126 | 0.048 | -7.341 | 2.12E-13 | 0.000 | 0.000 | 0.017 | 0.001 | 0.982 | 0.137 | -6.430 | **1.28E-10** | 0.000 | 0.000 | 0.073 | 0.126 | **0.801** |
| ***SNX32*** | 11 | 65601112~65624367 | 0.285 | 6.707 | 1.99E-11 | 0.000 | 0.000 | 0.000 | 0.002 | 0.998 | 0.342 | 6.919 | **4.56E-12** | 0.000 | 0.000 | 0.000 | 0.003 | **0.997** |
| *SLC9A3R2* | 16 | 2075357~2089027 | 0.094 | 6.662 | 2.71E-11 | 0.000 | 0.000 | 0.004 | 0.008 | 0.988 | - | - | - | - | - | - | - | - |
| *SCYL1* | 11 | 65292548~65306175 | 0.043 | 6.419 | 1.37E-10 | 0.000 | 0.000 | 0.128 | 0.015 | 0.857 | - | - | - | - | - | - | - | - |
| ***VKORC1*** | 16 | 31102163~31107301 | 0.064 | -6.180 | 6.42E-10 | 0.000 | 0.000 | 0.130 | 0.038 | 0.831 | 0.053 | -7.746 | **9.51E-15** | 0.000 | 0.000 | 0.141 | 0.026 | **0.833** |
| *MADD* | 11 | 47290712~47351582 | 0.368 | 6.050 | 1.45E-09 | 0.000 | 0.000 | 0.000 | 1.000 | 0.000 | - | - | - | - | - | - | - | - |
| ***GPX1*** | 3 | 49394609~49396033 | 0.423 | 5.973 | 2.32E-09 | 0.000 | 0.000 | 0.000 | 0.031 | 0.969 | 0.527 | 6.444 | **1.16E-10** | 0.000 | 0.000 | 0.000 | 0.031 | **0.969** |
| *CADPS2* | 7 | 121958481~122526813 | 0.057 | 5.846 | 5.03E-09 | 0.845 | 0.069 | 0.032 | 0.003 | 0.051 | - | - | - | - | - | - | - | - |
| *AK5* | 1 | 77747736~78025651 | 0.122 | -5.710 | 1.13E-08 | 0.000 | 0.000 | 0.000 | 1.000 | 0.000 | - | - | - | - | - | - | - | - |
| *TRAF3* | 14 | 103243813~103377837 | 0.087 | 5.698 | 1.21E-08 | 0.000 | 0.000 | 0.000 | 0.006 | 0.994 | 0.227 | 1.905 | 5.68E-02 | - | - | - | - | - |
| *HSD17B12* | 11 | 43577986~43878167 | 0.325 | -5.671 | 1.42E-08 | 0.000 | 0.000 | 0.000 | 0.678 | 0.322 | - | - | - | - | - | - | - | - |
| *AAGAB* | 15 | 67493371~67547533 | 0.052 | 5.640 | 1.70E-08 | 0.000 | 0.000 | 0.002 | 0.024 | 0.974 | - | - | - | - | - | - | - | - |
| *CPNE3* | 8 | 87497059~87573726 | 0.147 | -5.576 | 2.46E-08 | 0.000 | 0.000 | 0.000 | 0.015 | 0.985 | 0.157 | -3.912 | 9.15E-05 | 0.000 | 0.000 | 0.567 | 0.055 | 0.378 |
| *FTO* | 16 | 53737875~54155853 | 0.131 | 5.549 | 2.88E-08 | 0.000 | 0.000 | 0.574 | 0.401 | 0.024 | - | - | - | - | - | - | - | - |
| *BCL2L13* | 22 | 18111621~18213388 | 0.204 | -5.431 | 5.60E-08 | 0.000 | 0.011 | 0.000 | 0.011 | 0.978 | 0.218 | 0.239 | 8.11E-01 | - | - | - | - | - |
| ***PANK4*** | 1 | 2439972~2458039 | 0.087 | 5.334 | 9.61E-08 | 0.000 | 0.001 | 0.000 | 0.072 | 0.927 | 0.421 | 5.183 | **2.19E-07** | 0.000 | 0.000 | 0.000 | 0.010 | **0.990** |
| *ASPHD1* | 16 | 29911696~29931185 | 0.300 | 5.318 | 1.05E-07 | 0.000 | 0.000 | 0.000 | 1.000 | 0.000 | - | - | - | - | - | - | - | - |
| *RUFY1* | 5 | 178977559~179037027 | 0.092 | 5.273 | 1.34E-07 | 0.014 | 0.025 | 0.007 | 0.011 | 0.942 | - | - | - | - | - | - | - | - |
| ***RAB27B*** | 18 | 52385091~52562747 | 0.162 | -5.235 | 1.65E-07 | 0.000 | 0.003 | 0.000 | 0.023 | 0.973 | 0.105 | -4.562 | **5.07E-06** | 0.006 | 0.003 | 0.080 | 0.038 | **0.872** |
| *PCYT1A* | 3 | 195941093~196014828 | 0.087 | 5.193 | 2.07E-07 | 0.000 | 0.003 | 0.001 | 0.020 | 0.976 | - | - | - | - | - | - | - | - |
| ***DPYSL4*** | 10 | 134000404~134019280 | 0.121 | 5.119 | 3.08E-07 | 0.000 | 0.000 | 0.000 | 0.002 | 0.998 | 0.157 | 6.545 | **5.96E-11** | 0.000 | 0.000 | 0.009 | 0.018 | **0.973** |
| *ABHD12* | 20 | 25275379~25371619 | 0.396 | 5.097 | 3.45E-07 | 0.000 | 0.000 | 0.000 | 1.000 | 0.000 | - | - | - | - | - | - | - | - |
| *APMAP* | 20 | 24943561~24973615 | 0.038 | 5.070 | 3.98E-07 | 0.001 | 0.002 | 0.206 | 0.266 | 0.524 | - | - | - | - | - | - | - | - |
| ***DPYSL5*** | 2 | 27070615~27173219 | 0.190 | 5.067 | 4.05E-07 | 0.000 | 0.000 | 0.000 | 0.048 | 0.952 | 0.168 | 5.910 | **3.41E-09** | 0.000 | 0.000 | 0.005 | 0.016 | **0.979** |
| *CRTAC1* | 10 | 99624757~99790585 | 0.153 | -5.063 | 4.13E-07 | 0.000 | 0.000 | 0.003 | 0.934 | 0.063 | - | - | - | - | - | - | - | - |
| *PPCDC* | 15 | 75315896~75409803 | 0.071 | -5.058 | 4.24E-07 | 0.017 | 0.014 | 0.013 | 0.010 | 0.946 | - | - | - | - | - | - | - | - |
| *CNNM2* | 10 | 104678050~104849978 | 0.145 | 4.943 | 7.71E-07 | 0.000 | 0.257 | 0.000 | 0.016 | 0.727 | - | - | - | - | - | - | - | - |
| ***ADPGK*** | 15 | 73043710~73078187 | 0.103 | 4.933 | 8.10E-07 | 0.000 | 0.000 | 0.006 | 0.143 | 0.851 | 0.120 | 4.373 | **1.23E-05** | 0.000 | 0.000 | 0.122 | 0.017 | **0.861** |
| *ELP3* | 8 | 27947190~28048673 | 0.033 | 4.899 | 9.64E-07 | 0.613 | 0.059 | 0.043 | 0.004 | 0.282 | - | - | - | - | - | - | - | - |
| ***FAM114A2*** | 5 | 153369688~153418496 | 0.102 | 4.869 | 1.12E-06 | 0.000 | 0.001 | 0.000 | 0.042 | 0.957 | 0.179 | 3.830 | **1.28E-04** | 0.000 | 0.002 | 0.000 | 0.047 | **0.951** |
| ***LYRM4*** | 6 | 5102827~5261172 | 0.336 | 4.812 | 1.49E-06 | 0.000 | 0.014 | 0.000 | 0.003 | 0.984 | 0.275 | 3.622 | **2.93E-04** | 0.003 | 0.031 | 0.001 | 0.007 | **0.958** |
| *LACE1* | 6 | 108616098~108847999 | 0.087 | 4.804 | 1.55E-06 | 0.000 | 0.000 | 0.682 | 0.072 | 0.247 | - | - | - | - | - | - | - | - |
| *AAK1* | 2 | 69688532~69901481 | 0.056 | -4.801 | 1.58E-06 | 0.000 | 0.000 | 0.030 | 0.021 | 0.949 | 0.086 | -2.329 | 1.98E-02 | 0.002 | 0.000 | 0.582 | 0.058 | 0.358 |
| *RABEP1* | 17 | 5185558~5289129 | 0.107 | 4.716 | 2.40E-06 | 0.000 | 0.004 | 0.000 | 0.928 | 0.068 | - | - | - | - | - | - | - | - |
| *CDC42BPB* | 14 | 103398716~103523799 | 0.065 | 4.661 | 3.15E-06 | 0.000 | 0.000 | 0.135 | 0.344 | 0.521 | - | - | - | - | - | - | - | - |
| *SLC25A12* | 2 | 172640880~172864766 | 0.104 | -4.633 | 3.61E-06 | 0.000 | 0.012 | 0.000 | 0.201 | 0.788 | - | - | - | - | - | - | - | - |
| *TYW5* | 2 | 200794698~200820459 | 0.025 | 4.630 | 3.67E-06 | 0.057 | 0.013 | 0.070 | 0.015 | 0.846 | - | - | - | - | - | - | - | - |
| *ADCY9* | 16 | 4003388~4166186 | 0.076 | -4.584 | 4.56E-06 | 0.000 | 0.000 | 0.123 | 0.287 | 0.590 | - | - | - | - | - | - | - | - |
| *SYTL2* | 11 | 85405267~85522184 | 0.230 | 4.546 | 5.48E-06 | 0.617 | 0.277 | 0.021 | 0.009 | 0.077 | - | - | - | - | - | - | - | - |
| *RPAP1* | 15 | 41809374~41836467 | 0.083 | -4.543 | 5.55E-06 | 0.178 | 0.112 | 0.039 | 0.024 | 0.647 | - | - | - | - | - | - | - | - |
| *RASGRF1* | 15 | 79252289~79383115 | 0.032 | 4.534 | 5.80E-06 | 0.026 | 0.006 | 0.048 | 0.010 | 0.909 | - | - | - | - | - | - | - | - |
| *VWA7* | 6 | 31733367~31745108 | 0.683 | 4.523 | 6.11E-06 | 0.000 | 0.000 | 0.000 | 0.000 | 0.999 | - | - | - | - | - | - | - | - |
| *SKIV2L* | 6 | 31926857~31937532 | 0.103 | 4.497 | 6.89E-06 | 0.002 | 0.002 | 0.020 | 0.014 | 0.962 | - | - | - | - | - | - | - | - |
| *CHORDC1* | 11 | 89934328~89956532 | 0.080 | -4.472 | 7.73E-06 | 0.004 | 0.001 | 0.021 | 0.004 | 0.971 | - | - | - | - | - | - | - | - |
| *PSMG1* | 21 | 40546695~40555777 | 0.032 | 4.443 | 8.87E-06 | 0.154 | 0.043 | 0.118 | 0.032 | 0.653 | - | - | - | - | - | - | - | - |
| *GRID1* | 10 | 87359312~88126250 | 0.208 | -4.435 | 9.23E-06 | 0.000 | 0.340 | 0.000 | 0.622 | 0.039 | - | - | - | - | - | - | - | - |
| ***NDUFAF1*** | 15 | 41679551~41694717 | 0.261 | -4.429 | 9.45E-06 | 0.000 | 0.123 | 0.000 | 0.029 | 0.849 | 0.414 | -4.927 | **8.37E-07** | 0.010 | 0.098 | 0.002 | 0.023 | **0.867** |
| *TUBA4A* | 2 | 220114433~220142892 | 0.024 | 4.361 | 1.30E-05 | 0.704 | 0.077 | 0.042 | 0.004 | 0.172 | - | - | - | - | - | - | - | - |
| *PLCB3* | 11 | 64018995~64036622 | 0.048 | -4.360 | 1.30E-05 | 0.126 | 0.137 | 0.010 | 0.010 | 0.718 | - | - | - | - | - | - | - | - |
| *PPTC7* | 12 | 110969120~111021125 | 0.044 | -4.361 | 1.30E-05 | 0.002 | 0.009 | 0.002 | 0.009 | 0.978 | - | - | - | - | - | - | - | - |
| *PDE4C* | 19 | 18318771~18366229 | 0.100 | -4.354 | 1.34E-05 | 0.000 | 0.000 | 0.030 | 0.966 | 0.004 | - | - | - | - | - | - | - | - |
| *GSTP1* | 11 | 67351066~67354131 | 0.123 | 4.327 | 1.51E-05 | 0.000 | 0.083 | 0.000 | 0.154 | 0.763 | - | - | - | - | - | - | - | - |
| *FARS2* | 6 | 5261277~5771813 | 0.147 | 4.280 | 1.87E-05 | 0.008 | 0.034 | 0.002 | 0.008 | 0.948 | 0.189 | 2.724 | 6.45E-03 | 0.314 | 0.093 | 0.081 | 0.024 | 0.489 |
| ***ULK3*** | 15 | 75128457~75135687 | 0.347 | -4.212 | 2.53E-05 | 0.000 | 0.038 | 0.000 | 0.003 | 0.960 | 0.472 | -3.908 | **9.32E-05** | 0.000 | 0.040 | 0.000 | 0.002 | **0.957** |
| *CTSF* | 11 | 66330934~66336312 | 0.039 | -4.183 | 2.88E-05 | 0.869 | 0.067 | 0.015 | 0.001 | 0.048 | - | - | - | - | - | - | - | - |

HSQ: Heritability of the gene; "-": The brain protein-coding gene is not available in the replication cohort. The bonferroni correction threshold for discovery cohort is P < 0.05/1733 = 2.885 × 10-5. The bonferroni correction threshold for replication cohort is P < 0.05/22 = 2.273 × 10-3. The bolded genes represent the successfully replicated brain protein-coding genes.
