# Supplementary material for: Human Brain Proteome-wide Association Study Provides Insights into the Genetic Components of Protein Abundance in Obesity
Source: Research Square preprint supplement (doi:10.21203/rs.3.rs-3975196/v1), 2024-03-04
Supplement: Supplementary file 3 [file 35d6bd2d1104c3468a12e53b.docx]

**Supplementary Table 11: The association results of our identified genes in Gagnon et al.'s study**

| **Gene** | **This study (proteome-wide association study+colocalization)** | | | | | | | | **Gagnon’s study (Mendelian randomization+colocalization)** | | | |
| --- | --- | --- | --- | --- | --- | --- | --- | --- | --- | --- | --- | --- |
| **Related phenotype(s)** | **Lead phenotype** | **ROSMAP** | | | **BANNER** | | | **Phenotype** | **BETA** | ***P*** | **PPH4** |
| **Z** | ***P*** | **PPH4** | **Z** | ***P*** | **PPH4** |
| ***ABCG2*** | BMI, WC | BMI | 7.415 | 1.22E-13 | 0.998 | 7.217 | 5.31E-13 | 0.998 | BMI | 0.160 | 4.80E-13 | 0.980 |
| ***ACTR1B*** | BMI | BMI | -4.315 | 1.60E-05 | 0.988 | -4.843 | 1.28E-06 | 0.981 | BMI | -0.190 | 1.50E-06 | 0.990 |
| *ADCY3* | BFP, TFP, BMI, VAT, WC | BMI | -17.257 | 9.91E-67 | 0.948 | -19.518 | 7.74E-85 | 0.952 | BMI | - | - | - |
| *ADPGK* | BFP, TFP, BMI, VAT, WC | BFP | 7.407 | 1.29E-13 | 0.821 | 5.423 | 5.85E-08 | 0.865 | BMI | - | - | - |
| *ANXA5* | WHR | WHR | 4.669 | 3.03E-06 | 0.960 | 4.682 | 2.84E-06 | 0.964 | BMI | - | - | - |
| ***ARL3*** | BMI | BMI | -5.678 | 1.36E-08 | 0.988 | -4.763 | 1.91E-06 | 0.970 | BMI | -0.490 | 2.10E-13 | 0.970 |
| *ASL* | BFP, TFP | TFP | -5.814 | 6.12E-09 | 0.926 | -5.163 | 2.43E-07 | 0.884 | BMI | - | - | - |
| *B3GAT3* | BFP, TFP, WHR | TFP | 7.314 | 2.60E-13 | 0.981 | 6.494 | 8.36E-11 | 0.976 | BMI | - | - | - |
| *C3orf18* | BMI | BMI | -5.650 | 1.60E-08 | 0.970 | -4.819 | 1.44E-06 | 0.951 | BMI | - | - | - |
| *C9orf64* | BFP, TFP | TFP | 5.667 | 1.45E-08 | 0.907 | 4.686 | 2.79E-06 | 0.983 | BMI | - | - | - |
| *CAND2* | WHR | WHR | -5.485 | 4.14E-08 | 0.949 | -6.052 | 1.43E-09 | 0.970 | BMI | - | - | - |
| ***CCDC92*** | BFP, WHR | WHR | 15.228 | 2.30E-52 | 0.952 | 13.968 | 2.44E-44 | 0.856 | BMI | -0.240 | 6.30E-05 | 0.870 |
| ***CNNM2*** | BMI | BMI | 10.230 | 1.46E-24 | 0.988 | 9.606 | 7.58E-22 | 0.987 | BMI | 0.690 | 1.60E-19 | 0.980 |
| ***COMT*** | BMI, WC | BMI | -5.659 | 1.53E-08 | 0.998 | -5.720 | 1.06E-08 | 0.998 | BMI | -0.090 | 1.30E-08 | 1.000 |
| *CPNE1* | WC | WC | -5.086 | 3.66E-07 | 0.848 | -5.392 | 6.97E-08 | 0.861 | BMI | - | - | - |
| *DAGLB* | WHR | WHR | -4.589 | 4.45E-06 | 0.988 | -4.493 | 7.03E-06 | 0.962 | BMI | - | - | - |
| *DCAKD* | TFP | TFP | -4.427 | 9.54E-06 | 0.832 | -5.728 | 1.01E-08 | 0.957 | BMI | - | - | - |
| ***DPYSL4*** | BFP, TFP, BMI, VAT, WC | BMI | 6.232 | 4.60E-10 | 0.999 | 7.099 | 1.26E-12 | 0.971 | BMI | 0.270 | 5.10E-14 | 1.000 |
| ***DPYSL5*** | BFP, TFP, VAT, WC | VAT | 5.067 | 4.05E-07 | 0.952 | 5.910 | 3.41E-09 | 0.979 | BMI | 0.250 | 2.00E-08 | 0.820 |
| *EIF2AK4* | TFP | TFP | 4.605 | 4.13E-06 | 0.956 | 4.086 | 4.39E-05 | 0.872 | BMI | - | - | - |
| *FAM114A2* | BFP, TFP, VAT | BFP | 5.303 | 1.14E-07 | 0.941 | 4.444 | 8.81E-06 | 0.945 | BMI | - | - | - |
| ***GBA2*** | BFP, TFP, BMI | BFP | 4.967 | 6.80E-07 | 0.988 | 4.710 | 2.48E-06 | 0.987 | BMI | 0.140 | 5.90E-06 | 0.930 |
| ***GPX1*** | BMI, VAT | BMI | 7.769 | 7.93E-15 | 0.992 | 8.035 | 9.32E-16 | 0.992 | BMI | 0.200 | 5.30E-17 | 0.990 |
| ***HINT1*** | BMI, WC | WC | -5.422 | 5.89E-08 | 0.990 | -5.243 | 1.58E-07 | 0.990 | BMI | -0.260 | 9.60E-09 | 0.980 |
| *HSD17B12* | WC, WHR | WC | -7.016 | 2.28E-12 | 0.959 | -5.928 | 3.07E-09 | 0.829 | BMI | - | - | - |
| *JMJD7* | WHR | WHR | 4.679 | 2.89E-06 | 0.997 | 4.085 | 4.41E-05 | 0.892 | BMI | - | - | - |
| *LRP4* | BFP | BFP | -4.282 | 1.85E-05 | 0.912 | -4.316 | 1.59E-05 | 0.950 | BMI | - | - | - |
| *LSM6* | WC | WC | 4.831 | 1.36E-06 | 0.967 | 4.969 | 6.72E-07 | 0.974 | BMI | - | - | - |
| ***LYRM4*** | VAT, WC | WC | 4.940 | 7.80E-07 | 0.981 | 4.184 | 2.86E-05 | 0.953 | BMI | 0.120 | 7.70E-06 | 0.870 |
| *MAP2K2* | BFP, TFP, BMI, VAT, WC | BMI | -9.292 | 1.51E-20 | 0.950 | -8.247 | 1.62E-16 | 0.848 | BMI | - | - | - |
| *MECR* | WHR | WHR | -4.703 | 2.56E-06 | 0.930 | -3.727 | 1.93E-04 | 0.913 | BMI | - | - | - |
| *MRPL9* | BFP, TFP | BFP | 5.430 | 5.63E-08 | 0.838 | 5.180 | 2.22E-07 | 0.898 | BMI | - | - | - |
| *MTERFD2* | BFP, TFP | TFP | -5.790 | 7.05E-09 | 0.984 | -6.148 | 7.82E-10 | 0.985 | BMI | - | - | - |
| ***NDUFAF1*** | BFP, TFP, BMI, VAT | BFP | -6.087 | 1.15E-09 | 0.973 | -5.929 | 3.05E-09 | 0.977 | BMI | -0.110 | 3.40E-07 | 0.980 |
| ***PANK4*** | BFP, BMI, VAT, WC | BMI | 6.843 | 7.77E-12 | 0.994 | 7.489 | 6.92E-14 | 1.000 | BMI | 0.360 | 1.20E-17 | 1.000 |
| *PFKM* | BFP, TFP | TFP | -5.198 | 2.01E-07 | 0.964 | -5.070 | 3.95E-07 | 0.986 | BMI | - | - | - |
| ***PIP4K2A*** | BMI | BMI | -4.767 | 1.87E-06 | 0.916 | -3.249 | 1.16E-03 | 0.873 | BMI | -0.058 | 2.30E-06 | 0.900 |
| *PLCB3* | BFP, TFP, BMI, WC | BMI | -8.144 | 3.83E-16 | 0.980 | -5.595 | 2.21E-08 | 0.864 | BMI | - | - | - |
| ***PSMD9*** | BFP, TFP, BMI, WC | BFP | 5.798 | 6.72E-09 | 0.991 | 6.282 | 3.34E-10 | 0.980 | BMI | 0.270 | 2.20E-06 | 0.980 |
| ***RAB27B*** | BFP, TFP, BMI, VAT, WC | BMI | -7.199 | 6.08E-13 | 0.988 | -7.524 | 5.30E-14 | 0.960 | BMI | -0.150 | 4.50E-17 | 0.990 |
| *SENP8* | BMI | BMI | 5.117 | 3.10E-07 | 0.981 | 6.163 | 7.16E-10 | 0.937 | BMI | - | - | - |
| *SHMT1* | WHR | WHR | -4.882 | 1.05E-06 | 0.993 | -5.179 | 2.23E-07 | 0.980 | BMI | - | - | - |
| *SLC17A6* | TFP | TFP | 4.885 | 1.04E-06 | 0.991 | 4.479 | 7.50E-06 | 0.937 | BMI | - | - | - |
| ***SLC25A12*** | BFP, TFP, BMI, WC | BMI | -6.384 | 1.72E-10 | 0.969 | -5.553 | 2.81E-08 | 0.939 | BMI | -0.440 | 1.60E-11 | 0.930 |
| *SNX32* | VAT, WC, WHR | VAT | 6.707 | 1.99E-11 | 0.998 | 6.919 | 4.56E-12 | 0.997 | BMI | - | - | - |
| *SPRYD4* | BMI | BMI | -5.510 | 3.59E-08 | 0.997 | -5.107 | 3.27E-07 | 0.975 | BMI | - | - | - |
| *SULT1A1* | BMI, WHR | BMI | -13.013 | 1.03E-38 | 0.946 | -14.854 | 6.58E-50 | 0.914 | BMI | - | - | - |
| ***TMEM106B*** | BMI | BMI | -4.464 | 8.03E-06 | 0.834 | -4.021 | 5.81E-05 | 0.895 | BMI | -0.050 | 3.60E-06 | 0.950 |
| ***TYK2*** | BMI | BMI | -4.863 | 1.16E-06 | 0.981 | -3.985 | 6.74E-05 | 0.980 | BMI | -0.110 | 2.20E-06 | 0.990 |
| *UCHL3* | BFP, TFP | TFP | -5.382 | 7.38E-08 | 0.989 | -5.224 | 1.75E-07 | 0.991 | BMI | - | - | - |
| ***ULK3*** | BFP, TFP, BMI, VAT, WC | WC | -5.947 | 2.73E-09 | 0.999 | -5.796 | 6.79E-09 | 0.999 | BMI | -0.150 | 1.40E-09 | 0.990 |
| *VKORC1* | BFP, TFP, BMI, VAT | BMI | -9.588 | 9.00E-22 | 0.899 | -11.537 | 8.61E-31 | 0.882 | BMI | - | - | - |

PPH4:posterior probability of H4 in colocalization test; Related phenotype(s): Associated phenotype(s) at the bonferroni threshold in discovery and replication stage; Lead phenotype: Most significant phenotype in proteome-wide association studies; "-": Not available. The bolded genes represent overlapping genes in the two studies.
