# Supplementary material for: Human Brain Proteome-wide Association Study Provides Insights into the Genetic Components of Protein Abundance in Obesity
Source: Research Square preprint supplement (doi:10.21203/rs.3.rs-3975196/v1), 2024-03-04
Supplement: Supplementary file 4 [file 3f76d527a953d0954bc9544c.docx]

**Supplementary Table 2: Proteome-wide Significant Genes for Trunk Fat Percentage**

| **Gene** | **CHR** | **Position** | **ROSMAP (Discovery)** | | | | | | | | **BANNER (Replication)** | | | | | | | |
| --- | --- | --- | --- | --- | --- | --- | --- | --- | --- | --- | --- | --- | --- | --- | --- | --- | --- | --- |
| **HSQ** | **PWAS.Z** | **PWAS.P** | **COLOC.PP0** | **COLOC.PP1** | **COLOC.PP2** | **COLOC.PP3** | **COLOC.PP4** | **HSQ** | **PWAS.Z** | **PWAS.P** | **COLOC.PP0** | **COLOC.PP1** | **COLOC.PP2** | **COLOC.PP3** | **COLOC.PP4** |
| *CCDC92* | 12 | 124403207~124457378 | 0.064 | -13.184 | 1.08E-39 | 0.000 | 0.000 | 0.000 | 0.035 | 0.965 | 0.450 | -11.600 | 6.32E-31 | 0.000 | 0.000 | 0.000 | 0.248 | 0.752 |
| ***ADCY3*** | 2 | 25042038~25142708 | 0.074 | -11.003 | 3.70E-28 | 0.000 | 0.000 | 0.038 | 0.022 | 0.940 | 0.129 | -13.974 | **2.25E-44** | 0.000 | 0.000 | 0.041 | 0.010 | **0.948** |
| *SULT1A1* | 16 | 28616903~28634946 | 0.361 | -10.715 | 8.70E-27 | 0.000 | 0.000 | 0.000 | 0.999 | 0.001 | - | - | - | - | - | - | - | - |
| *MADD* | 11 | 47290712~47351582 | 0.368 | 8.936 | 4.02E-19 | 0.000 | 0.000 | 0.000 | 1.000 | 0.000 | - | - | - | - | - | - | - | - |
| *AAGAB* | 15 | 67493371~67547533 | 0.052 | 8.319 | 8.90E-17 | 0.000 | 0.000 | 0.002 | 0.031 | 0.967 | - | - | - | - | - | - | - | - |
| *CSDC2* | 22 | 41956767~41973745 | 0.179 | 8.144 | 3.82E-16 | 0.000 | 0.000 | 0.000 | 0.509 | 0.491 | - | - | - | - | - | - | - | - |
| *XRCC6* | 22 | 42017123~42060044 | 0.026 | -7.849 | 4.18E-15 | 0.000 | 0.000 | 0.189 | 0.030 | 0.781 | - | - | - | - | - | - | - | - |
| ***B3GAT3*** | 11 | 62382768~62389647 | 0.083 | 7.314 | 2.60E-13 | 0.000 | 0.000 | 0.000 | 0.019 | 0.981 | 0.176 | 6.494 | **8.36E-11** | 0.000 | 0.000 | 0.007 | 0.017 | **0.976** |
| *DOC2A* | 16 | 30016830~30034591 | 0.062 | 7.281 | 3.30E-13 | 0.000 | 0.000 | 0.000 | 0.305 | 0.695 | - | - | - | - | - | - | - | - |
| *MON1A* | 3 | 49946302~49967606 | 0.020 | -7.259 | 3.90E-13 | 0.000 | 0.000 | 0.456 | 0.041 | 0.503 | - | - | - | - | - | - | - | - |
| ***ADPGK*** | 15 | 73043710~73078187 | 0.103 | 6.979 | 2.97E-12 | 0.000 | 0.000 | 0.007 | 0.172 | 0.821 | 0.120 | 5.285 | **1.25E-07** | 0.000 | 0.000 | 0.118 | 0.017 | **0.865** |
| *ADCY9* | 16 | 4003388~4166186 | 0.076 | -6.950 | 3.66E-12 | 0.000 | 0.000 | 0.116 | 0.271 | 0.613 | - | - | - | - | - | - | - | - |
| *SRSF9* | 12 | 120899471~120907596 | 0.278 | 6.947 | 3.73E-12 | 0.000 | 0.000 | 0.000 | 0.000 | 1.000 | - | - | - | - | - | - | - | - |
| ***VKORC1*** | 16 | 31102163~31107301 | 0.064 | -6.910 | 4.85E-12 | 0.000 | 0.000 | 0.080 | 0.023 | 0.897 | 0.053 | -8.669 | **4.36E-18** | 0.000 | 0.000 | 0.101 | 0.018 | **0.881** |
| ***PLCB3*** | 11 | 64018995~64036622 | 0.048 | -6.870 | 6.41E-12 | 0.000 | 0.000 | 0.014 | 0.014 | 0.972 | 0.067 | -5.994 | **2.05E-09** | 0.000 | 0.000 | 0.082 | 0.038 | **0.880** |
| *SKIV2L* | 6 | 31926857~31937532 | 0.103 | 6.842 | 7.83E-12 | 0.000 | 0.000 | 0.017 | 0.012 | 0.970 | - | - | - | - | - | - | - | - |
| ***MAP2K2*** | 19 | 4090319~4124126 | 0.048 | -6.757 | 1.41E-11 | 0.000 | 0.000 | 0.051 | 0.005 | 0.944 | 0.137 | -6.465 | **1.02E-10** | 0.000 | 0.000 | 0.052 | 0.089 | **0.859** |
| *SLC9A3R2* | 16 | 2075357~2089027 | 0.094 | 6.657 | 2.80E-11 | 0.000 | 0.000 | 0.004 | 0.009 | 0.986 | - | - | - | - | - | - | - | - |
| *SBF2* | 11 | 9800214~10315754 | 0.065 | -6.631 | 3.34E-11 | 0.000 | 0.000 | 0.641 | 0.092 | 0.267 | - | - | - | - | - | - | - | - |
| *AK5* | 1 | 77747736~78025651 | 0.122 | -6.338 | 2.33E-10 | 0.000 | 0.000 | 0.000 | 1.000 | 0.000 | - | - | - | - | - | - | - | - |
| *RUFY1* | 5 | 178977559~179037027 | 0.092 | 6.212 | 5.24E-10 | 0.000 | 0.000 | 0.003 | 0.004 | 0.992 | - | - | - | - | - | - | - | - |
| *NFU1* | 2 | 69622882~69664760 | 0.074 | 6.180 | 6.40E-10 | 0.000 | 0.000 | 0.002 | 0.285 | 0.714 | - | - | - | - | - | - | - | - |
| *BCL2L13* | 22 | 18111621~18213388 | 0.204 | -6.176 | 6.56E-10 | 0.000 | 0.001 | 0.000 | 0.033 | 0.966 | 0.218 | -1.136 | 2.56E-01 | - | - | - | - | - |
| *CADPS2* | 7 | 121958481~122526813 | 0.057 | 6.151 | 7.68E-10 | 0.003 | 0.000 | 0.765 | 0.063 | 0.170 | - | - | - | - | - | - | - | - |
| *GSTP1* | 11 | 67351066~67354131 | 0.123 | 6.066 | 1.31E-09 | 0.000 | 0.000 | 0.000 | 0.087 | 0.913 | 0.408 | 5.077 | 3.83E-07 | 0.000 | 0.000 | 0.000 | 0.364 | 0.636 |
| *AAK1* | 2 | 69688532~69901481 | 0.056 | -6.034 | 1.60E-09 | 0.000 | 0.000 | 0.130 | 0.095 | 0.776 | - | - | - | - | - | - | - | - |
| *SNX19* | 11 | 130745331~130786404 | 0.095 | 6.023 | 1.71E-09 | 0.000 | 0.000 | 0.003 | 0.967 | 0.031 | - | - | - | - | - | - | - | - |
| *UHRF1BP1* | 6 | 34759857~34850915 | 0.171 | -6.001 | 1.97E-09 | 0.000 | 0.000 | 0.002 | 0.086 | 0.913 | - | - | - | - | - | - | - | - |
| *PEPD* | 19 | 33877856~34012700 | 0.338 | 5.908 | 3.46E-09 | 0.000 | 0.000 | 0.000 | 1.000 | 0.000 | - | - | - | - | - | - | - | - |
| *CPNE3* | 8 | 87497059~87573726 | 0.147 | -5.828 | 5.60E-09 | 0.000 | 0.002 | 0.000 | 0.007 | 0.991 | 0.157 | -4.563 | 5.04E-06 | 0.086 | 0.008 | 0.373 | 0.036 | 0.496 |
| ***ASL*** | 7 | 65540785~65558545 | 0.223 | -5.814 | 6.12E-09 | 0.000 | 0.004 | 0.000 | 0.070 | 0.926 | 0.392 | -5.163 | **2.43E-07** | 0.000 | 0.007 | 0.000 | 0.109 | **0.884** |
| *TTC38* | 22 | 46663858~46689905 | 0.268 | -5.812 | 6.16E-09 | 0.000 | 0.000 | 0.000 | 1.000 | 0.000 | - | - | - | - | - | - | - | - |
| ***MTERFD2*** | 2 | 242011584~242041747 | 0.095 | -5.790 | 7.05E-09 | 0.000 | 0.000 | 0.000 | 0.016 | 0.984 | 0.227 | -6.148 | **7.82E-10** | 0.000 | 0.000 | 0.001 | 0.015 | **0.985** |
| *MESDC2* | 15 | 81239667~81282219 | 0.101 | 5.762 | 8.32E-09 | 0.000 | 0.000 | 0.000 | 0.005 | 0.995 | 0.143 | 3.009 | 2.62E-03 | 0.000 | 0.000 | 0.299 | 0.009 | 0.692 |
| ***PSMD9*** | 12 | 122326637~122356203 | 0.177 | 5.760 | 8.40E-09 | 0.000 | 0.000 | 0.000 | 0.008 | 0.992 | 0.193 | 6.230 | **4.63E-10** | 0.000 | 0.000 | 0.000 | 0.021 | **0.979** |
| *CTNND1* | 11 | 57520715~57587018 | 0.056 | -5.751 | 8.86E-09 | 0.000 | 0.000 | 0.003 | 0.011 | 0.986 | 0.124 | -3.573 | 3.53E-04 | 0.003 | 0.000 | 0.433 | 0.025 | 0.538 |
| *LMOD1* | 1 | 201865580~201915715 | 0.049 | -5.713 | 1.11E-08 | 0.000 | 0.000 | 0.085 | 0.016 | 0.899 | 0.306 | -4.658 | 3.19E-06 | 0.000 | 0.000 | 0.310 | 0.164 | 0.526 |
| ***C9orf64*** | 9 | 86553226~86571901 | 0.252 | 5.667 | 1.45E-08 | 0.000 | 0.000 | 0.000 | 0.093 | 0.907 | 0.141 | 4.686 | **2.79E-06** | 0.000 | 0.000 | 0.011 | 0.005 | **0.983** |
| *PIN1* | 19 | 9945933~9960358 | 0.032 | -5.660 | 1.52E-08 | 0.000 | 0.000 | 0.178 | 0.010 | 0.812 | - | - | - | - | - | - | - | - |
| *FTO* | 16 | 53737875~54155853 | 0.131 | 5.559 | 2.71E-08 | 0.000 | 0.000 | 0.574 | 0.401 | 0.024 | - | - | - | - | - | - | - | - |
| ***NDUFAF1*** | 15 | 41679551~41694717 | 0.261 | -5.552 | 2.83E-08 | 0.000 | 0.003 | 0.000 | 0.030 | 0.967 | 0.414 | -5.497 | **3.87E-08** | 0.000 | 0.002 | 0.002 | 0.023 | **0.973** |
| *CRTAC1* | 10 | 99624757~99790585 | 0.153 | -5.545 | 2.93E-08 | 0.000 | 0.000 | 0.003 | 0.939 | 0.059 | - | - | - | - | - | - | - | - |
| *SLC30A9* | 4 | 41992489~42092474 | 0.125 | 5.540 | 3.03E-08 | 0.003 | 0.009 | 0.008 | 0.023 | 0.958 | 0.084 | 2.966 | 3.02E-03 | 0.097 | 0.020 | 0.245 | 0.050 | 0.587 |
| *HIP1R* | 12 | 123319000~123347507 | 0.198 | -5.534 | 3.14E-08 | 0.000 | 0.005 | 0.000 | 0.000 | 0.994 | 0.079 | -5.780 | 7.58E-09 | 0.427 | 0.011 | 0.393 | 0.010 | 0.159 |
| *FAM160B2* | 8 | 21946670~21962409 | 0.047 | -5.504 | 3.72E-08 | 0.000 | 0.000 | 0.064 | 0.013 | 0.923 | - | - | - | - | - | - | - | - |
| *HSD17B12* | 11 | 43577986~43878167 | 0.325 | -5.435 | 5.49E-08 | 0.000 | 0.000 | 0.000 | 1.000 | 0.000 | - | - | - | - | - | - | - | - |
| ***MRPL9*** | 1 | 151732119~151736040 | 0.063 | 5.420 | 5.98E-08 | 0.000 | 0.002 | 0.002 | 0.142 | 0.854 | 0.140 | 5.103 | **3.35E-07** | 0.000 | 0.001 | 0.030 | 0.072 | **0.896** |
| *CNNM2* | 10 | 104678050~104849978 | 0.145 | 5.394 | 6.87E-08 | 0.000 | 0.328 | 0.000 | 0.022 | 0.649 | - | - | - | - | - | - | - | - |
| ***UCHL3*** | 13 | 76123619~76180085 | 0.208 | -5.382 | 7.38E-08 | 0.000 | 0.001 | 0.000 | 0.010 | 0.989 | 0.209 | -5.224 | **1.75E-07** | 0.000 | 0.001 | 0.000 | 0.008 | **0.991** |
| *DIP2B* | 12 | 50898768~51142450 | 0.077 | -5.352 | 8.72E-08 | 0.000 | 0.000 | 0.000 | 0.007 | 0.992 | 0.105 | -3.860 | 1.13E-04 | 0.001 | 0.000 | 0.240 | 0.011 | 0.748 |
| *STAT6* | 12 | 57489191~57525922 | 0.137 | 5.345 | 9.05E-08 | 0.000 | 0.001 | 0.000 | 0.018 | 0.981 | 0.217 | 4.170 | 3.07E-05 | 0.023 | 0.009 | 0.298 | 0.111 | 0.560 |
| *CPLX1* | 4 | 778745~819986 | 0.037 | -5.341 | 9.25E-08 | 0.000 | 0.000 | 0.364 | 0.095 | 0.541 | - | - | - | - | - | - | - | - |
| ***SLC25A12*** | 2 | 172640880~172864766 | 0.104 | -5.324 | 1.01E-07 | 0.000 | 0.000 | 0.000 | 0.120 | 0.880 | 0.126 | -5.171 | **2.33E-07** | 0.000 | 0.000 | 0.022 | 0.023 | **0.954** |
| *GPX1* | 3 | 49394609~49396033 | 0.423 | 5.303 | 1.14E-07 | 0.000 | 0.000 | 0.000 | 1.000 | 0.000 | - | - | - | - | - | - | - | - |
| *RABEP1* | 17 | 5185558~5289129 | 0.107 | 5.272 | 1.35E-07 | 0.000 | 0.002 | 0.000 | 0.282 | 0.716 | - | - | - | - | - | - | - | - |
| ***DPYSL4*** | 10 | 134000404~134019280 | 0.121 | 5.235 | 1.65E-07 | 0.000 | 0.000 | 0.000 | 0.001 | 0.999 | 0.157 | 6.330 | **2.46E-10** | 0.000 | 0.000 | 0.010 | 0.020 | **0.971** |
| *PLCD3* | 17 | 43186335~43210721 | 0.046 | 5.203 | 1.96E-07 | 0.000 | 0.000 | 0.266 | 0.071 | 0.663 | - | - | - | - | - | - | - | - |
| ***PFKM*** | 12 | 48498922~48540187 | 0.228 | -5.198 | 2.01E-07 | 0.000 | 0.000 | 0.000 | 0.036 | 0.964 | 0.291 | -5.070 | **3.95E-07** | 0.000 | 0.000 | 0.000 | 0.014 | **0.986** |
| *ABHD12* | 20 | 25275379~25371619 | 0.396 | 5.168 | 2.37E-07 | 0.000 | 0.000 | 0.000 | 1.000 | 0.000 | - | - | - | - | - | - | - | - |
| *MRPL10* | 17 | 45900638~45908900 | 0.246 | 5.118 | 3.09E-07 | 0.000 | 0.017 | 0.000 | 0.350 | 0.633 | - | - | - | - | - | - | - | - |
| *MKRN2* | 3 | 12598513~12625212 | 0.180 | 5.114 | 3.15E-07 | 0.000 | 0.092 | 0.002 | 0.414 | 0.492 | - | - | - | - | - | - | - | - |
| *GSTM2* | 1 | 110210644~110252171 | 0.476 | 5.081 | 3.75E-07 | 0.000 | 0.306 | 0.000 | 0.644 | 0.049 | - | - | - | - | - | - | - | - |
| *GSTM1* | 1 | 110230436~110251661 | 0.512 | 5.081 | 3.76E-07 | 0.000 | 0.464 | 0.000 | 0.461 | 0.075 | - | - | - | - | - | - | - | - |
| *SMCHD1* | 18 | 2655737~2805015 | 0.053 | -5.059 | 4.22E-07 | 0.038 | 0.002 | 0.723 | 0.037 | 0.200 | - | - | - | - | - | - | - | - |
| ***RAB27B*** | 18 | 52385091~52562747 | 0.162 | -5.042 | 4.61E-07 | 0.000 | 0.001 | 0.000 | 0.012 | 0.987 | 0.105 | -4.936 | **7.97E-07** | 0.002 | 0.001 | 0.028 | 0.013 | **0.956** |
| *NQO1* | 16 | 69740899~69760854 | 0.536 | -5.033 | 4.84E-07 | 0.000 | 0.000 | 0.000 | 1.000 | 0.000 | - | - | - | - | - | - | - | - |
| *TRAF3* | 14 | 103243813~103377837 | 0.087 | 5.032 | 4.85E-07 | 0.000 | 0.000 | 0.000 | 0.002 | 0.998 | 0.227 | 1.926 | 5.42E-02 | - | - | - | - | - |
| *WBP2* | 17 | 73841780~73852588 | 0.062 | -4.977 | 6.45E-07 | 0.000 | 0.000 | 0.086 | 0.403 | 0.510 | - | - | - | - | - | - | - | - |
| *CCDC127* | 5 | 196986~218330 | 0.337 | -4.958 | 7.14E-07 | 0.000 | 0.004 | 0.000 | 0.996 | 0.000 | - | - | - | - | - | - | - | - |
| *COPS7B* | 2 | 232646381~232673963 | 0.028 | 4.951 | 7.38E-07 | 0.109 | 0.015 | 0.261 | 0.034 | 0.581 | - | - | - | - | - | - | - | - |
| *TNC* | 9 | 117782806~117880536 | 0.050 | 4.938 | 7.88E-07 | 0.001 | 0.001 | 0.059 | 0.072 | 0.866 | 0.194 | 2.037 | 4.16E-02 | 0.005 | 0.007 | 0.284 | 0.415 | 0.290 |
| *DHRS7B* | 17 | 21026677~21096578 | 0.065 | -4.936 | 7.98E-07 | 0.000 | 0.006 | 0.000 | 0.005 | 0.989 | 0.071 | -3.167 | 1.54E-03 | 0.161 | 0.007 | 0.174 | 0.007 | 0.651 |
| ***DPYSL5*** | 2 | 27070615~27173219 | 0.190 | 4.922 | 8.58E-07 | 0.000 | 0.000 | 0.000 | 0.050 | 0.950 | 0.168 | 5.783 | **7.33E-09** | 0.000 | 0.000 | 0.006 | 0.018 | **0.976** |
| *ARSB* | 5 | 78073032~78281910 | 0.459 | 4.892 | 1.00E-06 | 0.000 | 0.149 | 0.000 | 0.607 | 0.244 | - | - | - | - | - | - | - | - |
| ***SLC17A6*** | 11 | 22359643~22401049 | 0.066 | 4.885 | 1.04E-06 | 0.000 | 0.001 | 0.001 | 0.007 | 0.991 | 0.127 | 4.479 | **7.50E-06** | 0.003 | 0.001 | 0.051 | 0.008 | **0.937** |
| ***FAM114A2*** | 5 | 153369688~153418496 | 0.102 | 4.871 | 1.11E-06 | 0.000 | 0.000 | 0.000 | 0.066 | 0.934 | 0.179 | 4.139 | **3.49E-05** | 0.000 | 0.000 | 0.000 | 0.061 | **0.938** |
| ***GBA2*** | 9 | 35736863~35749983 | 0.279 | 4.871 | 1.11E-06 | 0.000 | 0.009 | 0.000 | 0.006 | 0.985 | 0.409 | 4.622 | **3.80E-06** | 0.000 | 0.009 | 0.000 | 0.006 | **0.984** |
| *SYTL2* | 11 | 85405267~85522184 | 0.230 | 4.851 | 1.23E-06 | 0.015 | 0.007 | 0.643 | 0.289 | 0.046 | - | - | - | - | - | - | - | - |
| *LIME1* | 20 | 62366815~62370456 | 0.071 | 4.836 | 1.32E-06 | 0.000 | 0.000 | 0.051 | 0.010 | 0.939 | 0.078 | 4.064 | 4.82E-05 | 0.000 | 0.000 | 0.425 | 0.066 | 0.508 |
| *STX4* | 16 | 31044210~31054296 | 0.047 | -4.722 | 2.33E-06 | 0.000 | 0.000 | 0.629 | 0.329 | 0.042 | - | - | - | - | - | - | - | - |
| *RANGAP1* | 22 | 41641615~41682255 | 0.036 | 4.715 | 2.42E-06 | 0.000 | 0.000 | 0.580 | 0.076 | 0.344 | - | - | - | - | - | - | - | - |
| *MCCC1* | 3 | 182733006~182833863 | 0.370 | 4.710 | 2.47E-06 | 0.000 | 0.032 | 0.000 | 0.692 | 0.276 | - | - | - | - | - | - | - | - |
| *CD14* | 5 | 140011313~140013286 | 0.043 | -4.690 | 2.73E-06 | 0.295 | 0.024 | 0.225 | 0.018 | 0.438 | - | - | - | - | - | - | - | - |
| *IDUA* | 4 | 980785~998316 | 0.286 | -4.655 | 3.25E-06 | 0.000 | 0.000 | 0.000 | 0.024 | 0.976 | - | - | - | - | - | - | - | - |
| *DLG1* | 3 | 196769431~197026171 | 0.214 | -4.651 | 3.30E-06 | 0.000 | 0.001 | 0.002 | 0.996 | 0.002 | - | - | - | - | - | - | - | - |
| *PPTC7* | 12 | 110969120~111021125 | 0.044 | -4.642 | 3.45E-06 | 0.000 | 0.001 | 0.002 | 0.010 | 0.987 | - | - | - | - | - | - | - | - |
| *DCUN1D1* | 3 | 182655862~182703741 | 0.037 | 4.621 | 3.83E-06 | 0.006 | 0.008 | 0.129 | 0.165 | 0.693 | - | - | - | - | - | - | - | - |
| *CHORDC1* | 11 | 89934328~89956532 | 0.080 | -4.608 | 4.07E-06 | 0.003 | 0.001 | 0.480 | 0.110 | 0.406 | - | - | - | - | - | - | - | - |
| ***EIF2AK4*** | 15 | 40226347~40327797 | 0.101 | 4.605 | 4.13E-06 | 0.000 | 0.043 | 0.000 | 0.000 | 0.956 | 0.128 | 4.086 | **4.39E-05** | 0.082 | 0.044 | 0.002 | 0.000 | **0.872** |
| *VWA7* | 6 | 31733367~31745108 | 0.683 | 4.568 | 4.92E-06 | 0.000 | 0.000 | 0.042 | 0.685 | 0.273 | - | - | - | - | - | - | - | - |
| *PLEKHG3* | 14 | 65170820~65213610 | 0.087 | 4.560 | 5.13E-06 | 0.907 | 0.019 | 0.052 | 0.001 | 0.020 | - | - | - | - | - | - | - | - |
| *TDRKH* | 1 | 151742583~151763892 | 0.044 | 4.557 | 5.19E-06 | 0.001 | 0.001 | 0.047 | 0.095 | 0.856 | - | - | - | - | - | - | - | - |
| *MGMT* | 10 | 131265448~131566271 | 0.609 | 4.557 | 5.19E-06 | 0.000 | 0.000 | 0.000 | 0.007 | 0.993 | 0.518 | 3.237 | 1.21E-03 | 0.000 | 0.011 | 0.000 | 0.976 | 0.013 |
| *PTPLB* | 3 | 123209667~123304032 | 0.052 | 4.544 | 5.51E-06 | 0.000 | 0.000 | 0.145 | 0.759 | 0.096 | - | - | - | - | - | - | - | - |
| *SERGEF* | 11 | 17809595~18034709 | 0.249 | 4.498 | 6.87E-06 | 0.000 | 0.875 | 0.000 | 0.064 | 0.060 | - | - | - | - | - | - | - | - |
| *TTC19* | 17 | 15902694~15948329 | 0.033 | 4.494 | 7.00E-06 | 0.003 | 0.002 | 0.099 | 0.049 | 0.846 | 0.123 | 3.475 | 5.12E-04 | 0.021 | 0.001 | 0.570 | 0.026 | 0.382 |
| *LEMD2* | 6 | 33738979~33756913 | 0.074 | -4.493 | 7.04E-06 | 0.000 | 0.000 | 0.001 | 0.543 | 0.455 | - | - | - | - | - | - | - | - |
| *HARS2* | 5 | 140071011~140078889 | 0.027 | -4.486 | 7.25E-06 | 0.220 | 0.030 | 0.169 | 0.023 | 0.559 | - | - | - | - | - | - | - | - |
| ***DCAKD*** | 17 | 43100708~43138473 | 0.067 | -4.427 | 9.54E-06 | 0.000 | 0.000 | 0.136 | 0.032 | 0.832 | 0.145 | -5.728 | **1.01E-08** | 0.000 | 0.000 | 0.034 | 0.009 | **0.957** |
| *SAT2* | 17 | 7529552~7531194 | 0.365 | 4.404 | 1.06E-05 | 0.000 | 0.000 | 0.000 | 1.000 | 0.000 | - | - | - | - | - | - | - | - |
| *ARHGAP12* | 10 | 32094365~32217742 | 0.042 | 4.390 | 1.13E-05 | 0.113 | 0.087 | 0.030 | 0.023 | 0.747 | - | - | - | - | - | - | - | - |
| ***ULK3*** | 15 | 75128457~75135687 | 0.347 | -4.391 | 1.13E-05 | 0.000 | 0.008 | 0.000 | 0.001 | 0.991 | 0.472 | -4.153 | **3.28E-05** | 0.000 | 0.009 | 0.000 | 0.001 | **0.990** |
| *KHK* | 2 | 27309615~27323640 | 0.386 | 4.385 | 1.16E-05 | 0.000 | 0.067 | 0.000 | 0.328 | 0.604 | - | - | - | - | - | - | - | - |
| *ATP13A1* | 19 | 19756007~19774502 | 0.158 | -4.384 | 1.16E-05 | 0.000 | 0.000 | 0.000 | 0.000 | 1.000 | - | - | - | - | - | - | - | - |
| *FER* | 5 | 108083523~108532542 | 0.088 | 4.363 | 1.28E-05 | 0.486 | 0.395 | 0.006 | 0.005 | 0.108 | - | - | - | - | - | - | - | - |
| *UBQLN4* | 1 | 156005092~156023585 | 0.040 | 4.355 | 1.33E-05 | 0.153 | 0.061 | 0.332 | 0.131 | 0.323 | - | - | - | - | - | - | - | - |
| *SRR* | 17 | 2206677~2228554 | 0.211 | 4.348 | 1.38E-05 | 0.000 | 0.340 | 0.000 | 0.035 | 0.625 | - | - | - | - | - | - | - | - |
| *CSE1L* | 20 | 47662849~47713489 | 0.123 | 4.341 | 1.42E-05 | 0.000 | 0.000 | 0.000 | 0.006 | 0.994 | 0.162 | 2.804 | 5.05E-03 | 0.000 | 0.001 | 0.038 | 0.411 | 0.550 |
| *ERAP1* | 5 | 96096521~96143803 | 0.571 | -4.298 | 1.72E-05 | 0.000 | 0.161 | 0.000 | 0.796 | 0.042 | - | - | - | - | - | - | - | - |
| *APMAP* | 20 | 24943561~24973615 | 0.038 | 4.292 | 1.77E-05 | 0.000 | 0.000 | 0.342 | 0.442 | 0.216 | - | - | - | - | - | - | - | - |
| *ANO3* | 11 | 26210829~26684835 | 0.063 | -4.291 | 1.78E-05 | 0.887 | 0.107 | 0.003 | 0.000 | 0.002 | - | - | - | - | - | - | - | - |
| *FXN* | 9 | 71650175~71715094 | 0.268 | -4.282 | 1.86E-05 | 0.000 | 0.941 | 0.000 | 0.001 | 0.058 | - | - | - | - | - | - | - | - |
| *ASPHD1* | 16 | 29911696~29931185 | 0.300 | 4.277 | 1.90E-05 | 0.000 | 0.000 | 0.000 | 1.000 | 0.000 | - | - | - | - | - | - | - | - |
| *PSMG1* | 21 | 40546695~40555777 | 0.032 | 4.262 | 2.03E-05 | 0.057 | 0.016 | 0.378 | 0.105 | 0.444 | - | - | - | - | - | - | - | - |
| *SLC16A1* | 1 | 113454469~113499635 | 0.046 | 4.262 | 2.03E-05 | 0.277 | 0.086 | 0.053 | 0.016 | 0.568 | - | - | - | - | - | - | - | - |
| *OLA1* | 2 | 174937175~175113426 | 0.071 | 4.246 | 2.18E-05 | 0.000 | 0.000 | 0.001 | 0.017 | 0.982 | - | - | - | - | - | - | - | - |
| *IGFBP2* | 2 | 217497551~217529159 | 0.079 | 4.234 | 2.29E-05 | 0.043 | 0.026 | 0.009 | 0.004 | 0.917 | - | - | - | - | - | - | - | - |
| *MERTK* | 2 | 112656056~112787138 | 0.031 | -4.225 | 2.39E-05 | 0.151 | 0.067 | 0.041 | 0.018 | 0.723 | - | - | - | - | - | - | - | - |
| *GSTM5* | 1 | 110254864~110318050 | 0.489 | 4.219 | 2.46E-05 | 0.000 | 0.819 | 0.000 | 0.047 | 0.134 | - | - | - | - | - | - | - | - |
| *GDI2* | 10 | 5807186~5884095 | 0.103 | 4.200 | 2.67E-05 | 0.003 | 0.409 | 0.000 | 0.006 | 0.581 | - | - | - | - | - | - | - | - |

HSQ: Heritability of the gene; "-": The brain protein-coding gene is not available in the replication cohort. The bonferroni correction threshold for discovery cohort is P < 0.05/1752 = 2.854 × 10-5. The bonferroni correction threshold for replication cohort is P < 0.05/42 = 1.190 × 10-3. The bolded genes represent the successfully replicated brain protein-coding genes.
