# Supplementary material for: Human Brain Proteome-wide Association Study Provides Insights into the Genetic Components of Protein Abundance in Obesity
Source: Research Square preprint supplement (doi:10.21203/rs.3.rs-3975196/v1), 2024-03-04
Supplement: Supplementary file 5 [file 425dca118271349777928b1c.docx]

**Supplementary Table 5: Proteome-wide Significant Genes for Waist-circumference**

| **Gene** | **CHR** | **Position** | **ROSMAP (Discovery)** | | | | | | | | **BANNER (Replication)** | | | | | | | |
| --- | --- | --- | --- | --- | --- | --- | --- | --- | --- | --- | --- | --- | --- | --- | --- | --- | --- | --- |
| **HSQ** | **PWAS.Z** | **PWAS.P** | **COLOC.PP0** | **COLOC.PP1** | **COLOC.PP2** | **COLOC.PP3** | **COLOC.PP4** | **HSQ** | **PWAS.Z** | **PWAS.P** | **COLOC.PP0** | **COLOC.PP1** | **COLOC.PP2** | **COLOC.PP3** | **COLOC.PP4** |
| *DOC2A* | 16 | 30016830~30034591 | 0.062 | 13.600 | 4.00E-42 | 0.000 | 0.000 | 0.000 | 0.073 | 0.927 | 0.066 | 12.623 | 1.57E-36 | 0.000 | 0.000 | 0.253 | 0.101 | 0.646 |
| *SULT1A1* | 16 | 28616903~28634946 | 0.361 | -10.853 | 1.93E-27 | 0.000 | 0.000 | 0.000 | 0.258 | 0.742 | - | - | - | - | - | - | - | - |
| ***ADCY3*** | 2 | 25042038~25142708 | 0.074 | -9.740 | 2.04E-22 | 0.000 | 0.000 | 0.036 | 0.020 | 0.944 | 0.129 | -11.225 | **3.08E-29** | 0.000 | 0.000 | 0.040 | 0.010 | **0.950** |
| *MON1A* | 3 | 49946302~49967606 | 0.020 | -8.549 | 1.24E-17 | 0.000 | 0.000 | 0.471 | 0.042 | 0.486 | - | - | - | - | - | - | - | - |
| *ASPHD1* | 16 | 29911696~29931185 | 0.300 | 8.529 | 1.47E-17 | 0.000 | 0.000 | 0.000 | 1.000 | 0.000 | - | - | - | - | - | - | - | - |
| *SLC9A3R2* | 16 | 2075357~2089027 | 0.094 | 8.202 | 2.36E-16 | 0.000 | 0.000 | 0.001 | 0.002 | 0.996 | - | - | - | - | - | - | - | - |
| *VKORC1* | 16 | 31102163~31107301 | 0.064 | -8.111 | 5.02E-16 | 0.000 | 0.000 | 0.171 | 0.051 | 0.778 | - | - | - | - | - | - | - | - |
| *AAGAB* | 15 | 67493371~67547533 | 0.052 | 7.212 | 5.50E-13 | 0.000 | 0.000 | 0.002 | 0.032 | 0.965 | - | - | - | - | - | - | - | - |
| ***HSD17B12*** | 11 | 43577986~43878167 | 0.325 | -7.016 | 2.28E-12 | 0.000 | 0.000 | 0.000 | 0.041 | 0.959 | 0.554 | -5.928 | **3.07E-09** | 0.000 | 0.000 | 0.000 | 0.171 | **0.829** |
| ***MAP2K2*** | 19 | 4090319~4124126 | 0.048 | -6.909 | 4.88E-12 | 0.000 | 0.000 | 0.034 | 0.003 | 0.962 | 0.137 | -4.981 | **6.33E-07** | 0.000 | 0.000 | 0.060 | 0.103 | **0.837** |
| *LMOD1* | 1 | 201865580~201915715 | 0.049 | -6.774 | 1.25E-11 | 0.000 | 0.000 | 0.089 | 0.016 | 0.895 | 0.306 | -5.587 | 2.32E-08 | 0.000 | 0.000 | 0.310 | 0.164 | 0.526 |
| *MADD* | 11 | 47290712~47351582 | 0.368 | 6.582 | 4.65E-11 | 0.000 | 0.000 | 0.000 | 1.000 | 0.000 | - | - | - | - | - | - | - | - |
| *CNNM2* | 10 | 104678050~104849978 | 0.145 | 6.568 | 5.09E-11 | 0.000 | 0.000 | 0.000 | 0.500 | 0.500 | - | - | - | - | - | - | - | - |
| *FTO* | 16 | 53737875~54155853 | 0.131 | 6.533 | 6.47E-11 | 0.000 | 0.000 | 0.574 | 0.401 | 0.024 | - | - | - | - | - | - | - | - |
| *ADCY9* | 16 | 4003388~4166186 | 0.076 | -6.490 | 8.58E-11 | 0.000 | 0.000 | 0.116 | 0.272 | 0.612 | - | - | - | - | - | - | - | - |
| *UHRF1BP1* | 6 | 34759857~34850915 | 0.171 | -6.366 | 1.94E-10 | 0.000 | 0.000 | 0.002 | 0.128 | 0.870 | - | - | - | - | - | - | - | - |
| *TRAF3* | 14 | 103243813~103377837 | 0.087 | 6.296 | 3.06E-10 | 0.000 | 0.000 | 0.000 | 0.002 | 0.998 | 0.227 | 2.758 | 5.81E-03 | 0.000 | 0.000 | 0.363 | 0.074 | 0.562 |
| *RUFY1* | 5 | 178977559~179037027 | 0.092 | 6.134 | 8.60E-10 | 0.002 | 0.004 | 0.013 | 0.023 | 0.958 | - | - | - | - | - | - | - | - |
| *CADPS2* | 7 | 121958481~122526813 | 0.057 | 6.113 | 9.79E-10 | 0.000 | 0.000 | 0.777 | 0.064 | 0.160 | - | - | - | - | - | - | - | - |
| ***SNX32*** | 11 | 65601112~65624367 | 0.285 | 5.988 | 2.12E-09 | 0.000 | 0.000 | 0.000 | 0.062 | 0.938 | 0.342 | 6.400 | **1.55E-10** | 0.000 | 0.000 | 0.000 | 0.072 | **0.928** |
| ***ULK3*** | 15 | 75128457~75135687 | 0.347 | -5.947 | 2.73E-09 | 0.000 | 0.000 | 0.000 | 0.001 | 0.999 | 0.472 | -5.796 | **6.79E-09** | 0.000 | 0.000 | 0.000 | 0.001 | **0.999** |
| *BCL2L13* | 22 | 18111621~18213388 | 0.204 | -5.911 | 3.40E-09 | 0.000 | 0.000 | 0.000 | 0.015 | 0.985 | 0.218 | -1.049 | 2.94E-01 | - | - | - | - | - |
| ***ADPGK*** | 15 | 73043710~73078187 | 0.103 | 5.793 | 6.90E-09 | 0.000 | 0.000 | 0.007 | 0.171 | 0.823 | 0.120 | 5.390 | **7.05E-08** | 0.000 | 0.000 | 0.118 | 0.017 | **0.865** |
| ***DPYSL4*** | 10 | 134000404~134019280 | 0.121 | 5.753 | 8.74E-09 | 0.000 | 0.000 | 0.000 | 0.001 | 0.999 | 0.157 | 6.912 | **4.77E-12** | 0.000 | 0.000 | 0.009 | 0.019 | **0.971** |
| *RASGRF1* | 15 | 79252289~79383115 | 0.032 | 5.681 | 1.34E-08 | 0.000 | 0.000 | 0.045 | 0.010 | 0.945 | - | - | - | - | - | - | - | - |
| ***COMT*** | 22 | 19929130~19957498 | 0.421 | -5.612 | 2.00E-08 | 0.000 | 0.000 | 0.000 | 0.001 | 0.999 | 0.606 | -5.480 | **4.25E-08** | 0.000 | 0.000 | 0.000 | 0.001 | **0.999** |
| ***ABCG2*** | 4 | 89011416~89152474 | 0.143 | 5.533 | 3.15E-08 | 0.000 | 0.000 | 0.000 | 0.002 | 0.997 | 0.575 | 5.374 | **7.69E-08** | 0.000 | 0.000 | 0.000 | 0.002 | **0.998** |
| *GSTP1* | 11 | 67351066~67354131 | 0.123 | 5.483 | 4.19E-08 | 0.000 | 0.001 | 0.000 | 0.211 | 0.787 | - | - | - | - | - | - | - | - |
| ***PANK4*** | 1 | 2439972~2458039 | 0.087 | 5.461 | 4.73E-08 | 0.000 | 0.004 | 0.000 | 0.081 | 0.915 | 0.421 | 5.031 | **4.88E-07** | 0.000 | 0.001 | 0.000 | 0.013 | **0.986** |
| *PGP* | 16 | 2261998~2264808 | 0.057 | 5.458 | 4.81E-08 | 0.000 | 0.000 | 0.108 | 0.202 | 0.689 | - | - | - | - | - | - | - | - |
| ***HINT1*** | 5 | 130494720~130507428 | 0.064 | -5.422 | 5.89E-08 | 0.000 | 0.000 | 0.000 | 0.010 | 0.990 | 0.160 | -5.243 | **1.58E-07** | 0.000 | 0.000 | 0.000 | 0.010 | **0.990** |
| *AK5* | 1 | 77747736~78025651 | 0.122 | -5.384 | 7.30E-08 | 0.000 | 0.000 | 0.000 | 1.000 | 0.000 | - | - | - | - | - | - | - | - |
| *TYW5* | 2 | 200794698~200820459 | 0.025 | 5.339 | 9.34E-08 | 0.003 | 0.001 | 0.100 | 0.022 | 0.874 | - | - | - | - | - | - | - | - |
| *CRTAC1* | 10 | 99624757~99790585 | 0.153 | -5.196 | 2.04E-07 | 0.000 | 0.000 | 0.003 | 0.942 | 0.055 | - | - | - | - | - | - | - | - |
| *TUBA4A* | 2 | 220114433~220142892 | 0.024 | 5.154 | 2.54E-07 | 0.093 | 0.010 | 0.468 | 0.051 | 0.378 | - | - | - | - | - | - | - | - |
| *ACOT13* | 6 | 24667263~24705293 | 0.052 | -5.131 | 2.88E-07 | 0.192 | 0.020 | 0.501 | 0.053 | 0.234 | - | - | - | - | - | - | - | - |
| *CHORDC1* | 11 | 89934328~89956532 | 0.080 | -5.126 | 2.96E-07 | 0.000 | 0.000 | 0.029 | 0.006 | 0.965 | - | - | - | - | - | - | - | - |
| ***CPNE1*** | 20 | 34213953~34252878 | 0.421 | -5.086 | 3.66E-07 | 0.000 | 0.006 | 0.000 | 0.146 | 0.848 | 0.691 | -5.392 | **6.97E-08** | 0.000 | 0.006 | 0.000 | 0.133 | **0.861** |
| *NSF* | 17 | 44668035~44834830 | 0.198 | 5.044 | 4.56E-07 | 0.253 | 0.663 | 0.005 | 0.012 | 0.067 | - | - | - | - | - | - | - | - |
| ***PLCB3*** | 11 | 64018995~64036622 | 0.048 | -5.035 | 4.78E-07 | 0.000 | 0.000 | 0.014 | 0.014 | 0.972 | 0.067 | -4.465 | **8.02E-06** | 0.001 | 0.000 | 0.083 | 0.038 | **0.879** |
| *MPPED2* | 11 | 30406040~30608419 | 0.091 | -5.029 | 4.93E-07 | 0.000 | 0.000 | 0.258 | 0.051 | 0.691 | - | - | - | - | - | - | - | - |
| *PCYT1A* | 3 | 195941093~196014828 | 0.087 | 4.984 | 6.22E-07 | 0.000 | 0.006 | 0.034 | 0.658 | 0.301 | - | - | - | - | - | - | - | - |
| *STX4* | 16 | 31044210~31054296 | 0.047 | -4.961 | 7.01E-07 | 0.000 | 0.000 | 0.630 | 0.330 | 0.040 | - | - | - | - | - | - | - | - |
| ***LYRM4*** | 6 | 5102827~5261172 | 0.336 | 4.940 | 7.80E-07 | 0.000 | 0.016 | 0.000 | 0.003 | 0.981 | 0.275 | 4.184 | **2.86E-05** | 0.004 | 0.035 | 0.001 | 0.008 | **0.953** |
| *LACE1* | 6 | 108616098~108847999 | 0.087 | 4.917 | 8.79E-07 | 0.000 | 0.000 | 0.688 | 0.072 | 0.240 | - | - | - | - | - | - | - | - |
| ***PSMD9*** | 12 | 122326637~122356203 | 0.177 | 4.893 | 9.91E-07 | 0.000 | 0.000 | 0.000 | 0.009 | 0.991 | 0.193 | 5.997 | **2.01E-09** | 0.000 | 0.000 | 0.000 | 0.013 | **0.987** |
| *PDE2A* | 11 | 72287185~72385635 | 0.067 | -4.876 | 1.08E-06 | 0.010 | 0.001 | 0.504 | 0.049 | 0.436 | - | - | - | - | - | - | - | - |
| *RABEP1* | 17 | 5185558~5289129 | 0.107 | 4.863 | 1.15E-06 | 0.000 | 0.015 | 0.000 | 0.491 | 0.494 | - | - | - | - | - | - | - | - |
| *KIF21B* | 1 | 200938520~200992828 | 0.258 | 4.858 | 1.18E-06 | 0.000 | 0.084 | 0.000 | 0.003 | 0.913 | 0.219 | 4.830 | 1.37E-06 | 0.115 | 0.099 | 0.005 | 0.003 | 0.778 |
| ***SLC25A12*** | 2 | 172640880~172864766 | 0.104 | -4.859 | 1.18E-06 | 0.000 | 0.003 | 0.000 | 0.057 | 0.940 | 0.126 | -3.999 | **6.37E-05** | 0.003 | 0.003 | 0.032 | 0.034 | **0.929** |
| *SKIV2L* | 6 | 31926857~31937532 | 0.103 | 4.855 | 1.20E-06 | 0.000 | 0.000 | 0.043 | 0.032 | 0.925 | - | - | - | - | - | - | - | - |
| ***LSM6*** | 4 | 147096837~147121152 | 0.051 | 4.831 | 1.36E-06 | 0.000 | 0.008 | 0.000 | 0.025 | 0.967 | 0.100 | 4.969 | **6.72E-07** | 0.000 | 0.006 | 0.001 | 0.019 | **0.974** |
| *GNB1* | 1 | 1716729~1822495 | 0.035 | -4.824 | 1.41E-06 | 0.000 | 0.000 | 0.514 | 0.051 | 0.435 | - | - | - | - | - | - | - | - |
| *APMAP* | 20 | 24943561~24973615 | 0.038 | 4.757 | 1.97E-06 | 0.001 | 0.001 | 0.319 | 0.412 | 0.268 | - | - | - | - | - | - | - | - |
| *MPI* | 15 | 75182346~75191798 | 0.175 | 4.718 | 2.38E-06 | 0.000 | 0.003 | 0.000 | 0.672 | 0.326 | - | - | - | - | - | - | - | - |
| *GRID1* | 10 | 87359312~88126250 | 0.208 | -4.705 | 2.54E-06 | 0.000 | 0.001 | 0.000 | 0.999 | 0.000 | - | - | - | - | - | - | - | - |
| *SRSF9* | 12 | 120899471~120907596 | 0.278 | 4.685 | 2.80E-06 | 0.000 | 0.000 | 0.000 | 0.000 | 1.000 | - | - | - | - | - | - | - | - |
| *PHF3* | 6 | 64345725~64489229 | 0.052 | 4.670 | 3.02E-06 | 0.746 | 0.029 | 0.027 | 0.001 | 0.197 | - | - | - | - | - | - | - | - |
| *RWDD1* | 6 | 116892530~116918838 | 0.065 | -4.652 | 3.29E-06 | 0.000 | 0.041 | 0.000 | 0.022 | 0.937 | - | - | - | - | - | - | - | - |
| *FARS2* | 6 | 5261277~5771813 | 0.147 | 4.649 | 3.33E-06 | 0.009 | 0.037 | 0.002 | 0.009 | 0.942 | 0.189 | 3.579 | 3.45E-04 | 0.332 | 0.099 | 0.087 | 0.025 | 0.458 |
| *ERO1L* | 14 | 53106634~53162618 | 0.033 | -4.625 | 3.75E-06 | 0.480 | 0.067 | 0.041 | 0.005 | 0.406 | - | - | - | - | - | - | - | - |
| ***DPYSL5*** | 2 | 27070615~27173219 | 0.190 | 4.537 | 5.71E-06 | 0.000 | 0.002 | 0.000 | 0.070 | 0.928 | 0.168 | 5.687 | **1.29E-08** | 0.000 | 0.000 | 0.006 | 0.017 | **0.977** |
| ***RAB27B*** | 18 | 52385091~52562747 | 0.162 | -4.536 | 5.72E-06 | 0.000 | 0.001 | 0.000 | 0.012 | 0.987 | 0.105 | -4.776 | **1.79E-06** | 0.002 | 0.001 | 0.028 | 0.013 | **0.957** |
| *SCYL1* | 11 | 65292548~65306175 | 0.043 | 4.530 | 5.90E-06 | 0.000 | 0.000 | 0.126 | 0.014 | 0.860 | - | - | - | - | - | - | - | - |
| *PLEKHA1* | 10 | 124134212~124191867 | 0.042 | -4.522 | 6.11E-06 | 0.036 | 0.025 | 0.011 | 0.007 | 0.921 | 0.273 | 2.358 | 1.84E-02 | 0.181 | 0.028 | 0.055 | 0.008 | 0.728 |
| *CCDC127* | 5 | 196986~218330 | 0.337 | -4.489 | 7.16E-06 | 0.000 | 0.000 | 0.000 | 1.000 | 0.000 | - | - | - | - | - | - | - | - |
| *RPAP1* | 15 | 41809374~41836467 | 0.083 | -4.476 | 7.61E-06 | 0.070 | 0.044 | 0.069 | 0.042 | 0.775 | - | - | - | - | - | - | - | - |
| *PPCDC* | 15 | 75315896~75409803 | 0.071 | -4.467 | 7.92E-06 | 0.000 | 0.000 | 0.017 | 0.013 | 0.970 | - | - | - | - | - | - | - | - |
| *MRAS* | 3 | 138066539~138124375 | 0.104 | -4.450 | 8.59E-06 | 0.000 | 0.095 | 0.000 | 0.007 | 0.898 | - | - | - | - | - | - | - | - |
| *SDHA* | 5 | 218356~256815 | 0.107 | -4.447 | 8.72E-06 | 0.000 | 0.000 | 0.000 | 0.041 | 0.959 | - | - | - | - | - | - | - | - |
| *SACM1L* | 3 | 45730548~45786916 | 0.061 | 4.410 | 1.04E-05 | 0.842 | 0.044 | 0.040 | 0.002 | 0.071 | - | - | - | - | - | - | - | - |
| *ELP3* | 8 | 27947190~28048673 | 0.033 | 4.391 | 1.13E-05 | 0.262 | 0.025 | 0.087 | 0.008 | 0.618 | - | - | - | - | - | - | - | - |
| *ASL* | 7 | 65540785~65558545 | 0.223 | -4.382 | 1.17E-05 | 0.000 | 0.510 | 0.000 | 0.030 | 0.460 | - | - | - | - | - | - | - | - |
| *SV2C* | 5 | 75378997~75649764 | 0.093 | -4.382 | 1.17E-05 | 0.000 | 0.219 | 0.000 | 0.008 | 0.773 | - | - | - | - | - | - | - | - |
| *SRR* | 17 | 2206677~2228554 | 0.211 | 4.377 | 1.20E-05 | 0.000 | 0.117 | 0.000 | 0.824 | 0.059 | - | - | - | - | - | - | - | - |
| *TYK2* | 19 | 10461209~10491352 | 0.429 | -4.378 | 1.20E-05 | 0.000 | 0.454 | 0.000 | 0.045 | 0.501 | - | - | - | - | - | - | - | - |
| *CDC42BPB* | 14 | 103398716~103523799 | 0.065 | 4.372 | 1.23E-05 | 0.000 | 0.000 | 0.208 | 0.530 | 0.262 | - | - | - | - | - | - | - | - |
| *CTNNAL1* | 9 | 111704851~111775809 | 0.060 | 4.369 | 1.25E-05 | 0.069 | 0.040 | 0.209 | 0.119 | 0.564 | - | - | - | - | - | - | - | - |
| *SYTL2* | 11 | 85405267~85522184 | 0.230 | 4.363 | 1.28E-05 | 0.004 | 0.002 | 0.659 | 0.296 | 0.040 | - | - | - | - | - | - | - | - |
| *OLA1* | 2 | 174937175~175113426 | 0.071 | 4.353 | 1.34E-05 | 0.000 | 0.000 | 0.000 | 0.012 | 0.987 | - | - | - | - | - | - | - | - |
| *PTPLB* | 3 | 123209667~123304032 | 0.052 | 4.321 | 1.55E-05 | 0.000 | 0.000 | 0.047 | 0.246 | 0.706 | - | - | - | - | - | - | - | - |
| *CPNE3* | 8 | 87497059~87573726 | 0.147 | -4.316 | 1.59E-05 | 0.000 | 0.150 | 0.000 | 0.016 | 0.834 | 0.157 | -3.477 | 5.07E-04 | 0.780 | 0.076 | 0.071 | 0.007 | 0.066 |
| *NUDCD3* | 7 | 44418720~44530479 | 0.093 | 4.314 | 1.61E-05 | 0.000 | 0.106 | 0.000 | 0.149 | 0.745 | - | - | - | - | - | - | - | - |
| *TRIM65* | 17 | 73876416~73893084 | 0.193 | 4.267 | 1.98E-05 | 0.000 | 0.019 | 0.000 | 0.073 | 0.908 | - | - | - | - | - | - | - | - |
| *PLEKHG3* | 14 | 65170820~65213610 | 0.087 | 4.256 | 2.08E-05 | 0.963 | 0.020 | 0.015 | 0.000 | 0.001 | - | - | - | - | - | - | - | - |
| *IGFBP2* | 2 | 217497551~217529159 | 0.079 | 4.247 | 2.17E-05 | 0.107 | 0.065 | 0.004 | 0.002 | 0.822 | - | - | - | - | - | - | - | - |
| *FAM114A2* | 5 | 153369688~153418496 | 0.102 | 4.243 | 2.21E-05 | 0.000 | 0.000 | 0.000 | 0.985 | 0.015 | - | - | - | - | - | - | - | - |
| *LYZ* | 12 | 69742121~69748014 | 0.034 | 4.236 | 2.27E-05 | 0.026 | 0.008 | 0.321 | 0.101 | 0.543 | - | - | - | - | - | - | - | - |
| *AAK1* | 2 | 69688532~69901481 | 0.056 | -4.230 | 2.33E-05 | 0.002 | 0.002 | 0.071 | 0.051 | 0.874 | 0.086 | -1.504 | 1.33E-01 | - | - | - | - | - |
| *LUZP1* | 1 | 23410516~23504301 | 0.088 | 4.220 | 2.44E-05 | 0.000 | 0.000 | 0.008 | 0.026 | 0.966 | - | - | - | - | - | - | - | - |

HSQ: Heritability of the gene; "-": The brain protein-coding gene is not available in the replication cohort. The bonferroni correction threshold for discovery cohort is P < 0.05/1752 = 2.854 × 10-5. The bonferroni correction threshold for replication cohort is P < 0.05/28 = 1.786 × 10-3. The bolded genes represent the successfully replicated brain protein-coding genes.
