# Supplementary material for: Human Brain Proteome-wide Association Study Provides Insights into the Genetic Components of Protein Abundance in Obesity
Source: Research Square preprint supplement (doi:10.21203/rs.3.rs-3975196/v1), 2024-03-04
Supplement: Supplementary file 6 [file 77962c56c8d146b1d01e4c9b.docx]

**Supplementary Table 9b: Inconsistent Results Before and After Filtering for Schizophrenia-related SNPs**

| **Gene** | **Phenotype** | **After filter** | **TWAS.Z** | **TWAS.P** | **COLOC.PP0** | **COLOC.PP1** | **COLOC.PP2** | **COLOC.PP3** | **COLOC.PP4** |
| --- | --- | --- | --- | --- | --- | --- | --- | --- | --- |
| *CCDC92* | BFP | NO | **-7.705** | 1.30E-14 | 0.000 | 0.000 | 0.023 | 0.120 | **0.856** |
| *CCDC92* | BFP | YES | **-7.706** | 1.30E-14 | 0.000 | 0.000 | 0.023 | 0.118 | **0.859** |
| *CCDC92* | TFP | NO | -8.154 | 3.53E-16 | 0.000 | 0.000 | 0.029 | 0.151 | **0.819** |
| *CCDC92* | TFP | YES | -8.154 | 3.52E-16 | 0.000 | 0.000 | 0.027 | 0.139 | **0.833** |
| *CCDC92* | WHR | NO | 9.890 | 4.76E-23 | 0.000 | 0.000 | 0.020 | 0.101 | **0.880** |
| *CCDC92* | WHR | YES | 9.890 | 4.76E-23 | 0.000 | 0.000 | 0.024 | 0.122 | **0.854** |
