# Supplementary material for: Human Brain Proteome-wide Association Study Provides Insights into the Genetic Components of Protein Abundance in Obesity
Source: Research Square preprint supplement (doi:10.21203/rs.3.rs-3975196/v1), 2024-03-04
Supplement: Supplementary file 7 [file 9948a4ad0522a77e6976b48a.docx]

**Supplementary Table 7a: Druggability of Potential Protein Target Genes**

| **GWAS Phenotype(s)** | **Gene** | **Full name** | **UniProt ACC** | **UniProt ID** | **Target ID** | **Target type** | **Target name** | **Target-related disease(s)** | **Druggability tier (Finan et al. 2017)** | **Small mol druggable** | **Bio druggable** | **ADME gene** |
| --- | --- | --- | --- | --- | --- | --- | --- | --- | --- | --- | --- | --- |
| BMI, WC | *ABCG2* | ATP Binding Cassette Subfamily G Member 2 | Q9UNQ0 | ABCG2_HUMAN | T56556 | Successful target | ATP-binding cassette transporter G2 (ABCG2) | Irritable bowel syndrome [ICD-11: DD91]; Rheumatoid arthritis [ICD-11: FA20] | Tier 1 | Y | Y | Y |
| BMI | *ACTR1B* | Actin Related Protein 1B | P42025 | ACTY_HUMAN |  |  |  |  |  |  |  |  |
| BFP, TFP, BMI, VAT, WC | *ADCY3* | Adenylate Cyclase 3 | O60266 | ADCY3_HUMAN |  |  |  |  |  |  |  |  |
| BFP, TFP, BMI, VAT, WC | *ADPGK* | ADP Dependent Glucokinase | Q9BRR6 | ADPGK_HUMAN |  |  |  |  |  |  |  |  |
| WHR | *ANXA5* | Annexin A5 | P08758 | ANXA5_HUMAN | T72195 | Clinical trial target | Annexin A5 (ANXA5) | Injury [ICD-11: NA00-ND5Z] |  |  |  |  |
| BMI | *ARL3* | ADP Ribosylation Factor Like GTPase 3 | P36405 | ARL3_HUMAN |  |  |  |  |  |  |  |  |
| BFP, TFP | *ASL* | Argininosuccinate Lyase | P04424 | ARLY_HUMAN |  |  |  |  |  |  |  |  |
| BFP, TFP, WHR | *B3GAT3* | Beta-1,3-Glucuronyltransferase 3 | O94766 | B3GA3_HUMAN |  |  |  |  |  |  |  |  |
| BMI | *C3orf18* | Chromosome 3 Open Reading Frame 18 | Q9UK00 | CC018_HUMAN |  |  |  |  |  |  |  |  |
| BFP, TFP | *C9orf64* | Q-Nucleotide N-Glycosylase 1 | Q5T6V5 | QNG1_HUMAN |  |  |  |  |  |  |  |  |
| WHR | *CAND2* | Cullin Associated And Neddylation Dissociated 2 | O75155 | CAND2_HUMAN |  |  |  |  |  |  |  |  |
| BFP, WHR | *CCDC92* | Coiled-Coil Domain Containing 92 | Q53HC0 | CCD92_HUMAN |  |  |  |  |  |  |  |  |
| BMI | *CNNM2* | Cyclin And CBS Domain Divalent Metal Cation Transport Mediator 2 | Q9H8M5 | CNNM2_HUMAN |  |  |  |  |  |  |  |  |
| BMI, WC | *COMT* | Catechol-O-Methyltransferase | P21964 | COMT_HUMAN | T76904 | Successful target | Catechol-O-methyl-transferase (COMT) | Parkinsonism [ICD-11: 8A00] | Tier 1 | Y | N | N |
| WC | *CPNE1* | Copine 1 | Q99829 | CPNE1_HUMAN |  |  |  |  |  |  |  |  |
| WHR | *DAGLB* | Diacylglycerol Lipase Beta | Q8NCG7 | DGLB_HUMAN | T15509 | Literature-reported target | Diacylglycerol lipase beta (DAGLB) |  | Tier 1 | Y | N | N |
| TFP | *DCAKD* | Dephospho-CoA Kinase Domain Containing | Q8WVC6 | DCAKD_HUMAN |  |  |  |  |  |  |  |  |
| BFP, TFP, BMI, VAT, WC | *DPYSL4* | Dihydropyrimidinase Like 4 | O14531 | DPYL4_HUMAN |  |  |  |  |  |  |  |  |
| BFP, TFP,VAT, WC | *DPYSL5* | Dihydropyrimidinase Like 5 | Q9BPU6 | DPYL5_HUMAN |  |  |  |  |  |  |  |  |
| TFP | *EIF2AK4* | Eukaryotic Translation Initiation Factor 2 Alpha Kinase 4 | Q9P2K8 | E2AK4_HUMAN | T66396 | Literature-reported target | Eukaryotic translation initiation factor 2-alpha kinase 4 (EIF2AK4) |  | Tier 1 | Y | N | N |
| BFP, TFP, VAT | *FAM114A2* | Family With Sequence Similarity 114 Member A2 | Q9NRY5 | F1142_HUMAN |  |  |  |  |  |  |  |  |
| BFP, TFP, BMI | *GBA2* | Glucosylceramidase Beta 2 | Q9HCG7 | GBA2_HUMAN |  |  |  |  | Tier 2 | Y | N | N |
| BMI, VAT | *GPX1* | Glutathione Peroxidase 1 | P07203 | GPX1_HUMAN | T70654 | Literature-reported target | Glutathione peroxidase (GPX1) |  | Tier 1 | N | N | Y |
| BMI, WC | *HINT1* | Histidine Triad Nucleotide Binding Protein 1 | P49773 | HINT1_HUMAN |  |  |  |  |  |  |  |  |
| WC, WHR | *HSD17B12* | hydroxysteroid (17-beta) dehydrogenase 12 [Source:HGNC Symbol;Acc:18646] | Q53GQ0 | DHB12_HUMAN |  |  |  |  |  |  |  |  |
| WHR | *JMJD7* | Jumonji Domain Containing 7 | P0C870 | JMJD7_HUMAN |  |  |  |  |  |  |  |  |
| BFP | *LRP4* | LDL Receptor Related Protein 4 | O75096 | LRP4_HUMAN |  |  |  |  |  |  |  |  |
| WC | *LSM6* | LSM6 homolog, U6 small nuclear RNA associated (S. cerevisiae) [Source:HGNC Symbol;Acc:17017] | P62312 | LSM6_HUMAN |  |  |  |  |  |  |  |  |
| VAT, WC | *LYRM4* | LYR Motif Containing 4 | Q9HD34 | LYRM4_HUMAN |  |  |  |  |  |  |  |  |
| BFP, TFP, BMI, VAT, WC | *MAP2K2* | Mitogen-Activated Protein Kinase Kinase 2 | P36507 | MP2K2_HUMAN | T89055 | Clinical trial target | ERK activator kinase 2 (MEK2) | Melanoma [ICD-11: 2C30]; Thyroid cancer [ICD-11: 2D10] | Tier 1 | Y | N | N |
| WHR | *MECR* | Mitochondrial Trans-2-Enoyl-CoA Reductase | Q9BV79 | MECR_HUMAN |  |  |  |  |  |  |  |  |
| BFP, TFP | *MRPL9* | Mitochondrial Ribosomal Protein L9 | Q9BYD2 | RM09_HUMAN |  |  |  |  |  |  |  |  |
| BFP, TFP | *MTERFD2* | MTERF Domain-Containing Protein 2 | Q7Z6M4 | MTEF4_HUMAN |  |  |  |  |  |  |  |  |
| BFP, TFP, BMI, VAT | *NDUFAF1* | Ubiquinone Oxidoreductase Complex Assembly Factor 1 | Q9Y375 | CIA30_HUMAN |  |  |  |  |  |  |  |  |
| BFP, BMI, VAT, WC | *PANK4* | Pantothenate Kinase 4 | Q9NVE7 | PANK4_HUMAN |  |  |  |  |  |  |  |  |
| BFP, TFP | *PFKM* | Phosphofructokinase, Muscle | P08237 | PFKAM_HUMAN |  |  |  |  |  |  |  |  |
| BMI | *PIP4K2A* | Phosphatidylinositol-5-Phosphate 4-Kinase Type 2 Alpha | P48426 | PI42A_HUMAN |  |  |  |  |  |  |  |  |
| BFP, TFP, BMI, WC | *PLCB3* | Phospholipase C Beta 3 | Q01970 | PLCB3_HUMAN |  |  |  |  |  |  |  |  |
| BFP, TFP, BMI, WC | *PSMD9* | Proteasome 26S Subunit, Non-ATPase 9 | O00233 | PSMD9_HUMAN |  |  |  |  |  |  |  |  |
| BFP, TFP, BMI, VAT, WC | *RAB27B* | RAB27B, Member RAS Oncogene Family | O00194 | RB27B_HUMAN |  |  |  |  |  |  |  |  |
| BMI | *SENP8* | SUMO Peptidase Family Member, NEDD8 Specific | Q96LD8 | SENP8_HUMAN | T13928 | Literature-reported target | Deneddylase-1 (SENP8) |  | Tier 2 | Y | N | N |
| Waist-ratio hip | *SHMT1* | Serine Hydroxymethyltransferase 1 | P34896 | GLYC_HUMAN |  |  |  |  |  |  |  |  |
| TFP | *SLC17A6* | Solute Carrier Family 17 Member 6 | Q9P2U8 | VGLU2_HUMAN |  |  |  |  |  |  |  |  |
| BFP, TFP, BMI | *SLC25A12* | Solute Carrier Family 25 Member 12 | O75746 | S2512_HUMAN |  |  |  |  |  |  |  |  |
| VAT, WC, WHR | *SNX32* | Sorting Nexin 32 | Q86XE0 | SNX32_HUMAN |  |  |  |  |  |  |  |  |
| BMI | *SPRYD4* | SPRY Domain Containing 4 | Q8WW59 | SPRY4_HUMAN |  |  |  |  |  |  |  |  |
| BMI, WHR | *SULT1A1* | Sulfotransferase Family 1A Member 1 | P50225 | ST1A1_HUMAN |  |  |  |  | Tier 1 | N | N | Y |
| BMI | *TMEM106B* | Transmembrane Protein 106B | Q9NUM4 | T106B_HUMAN |  |  |  |  |  |  |  |  |
| BMI | *TYK2* | Tyrosine Kinase 2 | P29597 | TYK2_HUMAN | T78932 | Successful target | TYK2 tyrosine kinase (TYK2) | Psoriasis [ICD-11: EA90] |  |  |  |  |
| BFP, TFP | *UCHL3* | Ubiquitin C-Terminal Hydrolase L3 | P15374 | UCHL3_HUMAN | T77181 | Literature-reported target | Ubiquitin thioesterase L3 (UCHL3) |  | Tier 2 | Y | N | N |
| BFP, TFP, BMI, VAT, WC | *ULK3* | Unc-51 Like Kinase 3 | Q6PHR2 | ULK3_HUMAN | T16188 | Literature-reported target | Unc-51 like kinase 3 (ULK3) |  | Tier 1 | Y | N | N |
| BFP, TFP, BMI, VAT | *VKORC1* | Vitamin K Epoxide Reductase Complex Subunit 1 | Q9BQB6 | VKOR1_HUMAN | T11843 | Successful target | Vitamin K epoxide reductase complex 1 (VKORC1) | Bleeding disorder [ICD-11: GA20-GA21]; Coagulation defect [ICD-11: 3B10]; Pulmonary thromboembolism [ICD-11: BB00]; Supraventricular tachyarrhythmia [ICD-11: BC81]; Thrombosis [ICD-11: DB61-GB90] | Tier 1 | Y | N | N |

There are four levels of therapeutic target types. (Degree of credibility. Successful > clinical trial > patent-recorded > literature-reported) There are three levels of druggability tier. Tier 1 incorporated the targets of approved drugs and drugs in clinical development. Tier 2 incorporated proteins closely related to drug targets or with associated drug-like compounds. Tier 3 incorporated extracellular proteins and members of key drug target families (3A: in proximity (±50 kbp) to a GWAS SNP and had an extracellular location; 3B: the remainder of Tier 3).
