# Supplementary material for: Human Brain Proteome-wide Association Study Provides Insights into the Genetic Components of Protein Abundance in Obesity
Source: Research Square preprint supplement (doi:10.21203/rs.3.rs-3975196/v1), 2024-03-04
Supplement: Supplementary file 8 [file 9b5479e9ba37a2ff838f9605.docx]

**Supplementary Table 8: Effects of Proteome-wide Significant Genes at the Transcriptional Level in Human Brain**

| **Phenotype** | **Gene** | **CHR** | **POSITION** | **HSQ** | **TWAS.Z** | **TWAS.P** | **COLOC.PP4** |
| --- | --- | --- | --- | --- | --- | --- | --- |
| BFP | **ADCY3** | 2 | 25042038~25142055 | 0.156 | -17.400 | **8.27E-68** | **0.995** |
| **CCDC92** | 12 | 124420954~124457163 | 0.086 | -7.705 | **1.30E-14** | **0.856** |
| VKORC1 | 16 | 31102174~31106276 | 0.029 | -7.148 | 8.81E-13 | 0.359 |
| FAM114A2 | 5 | 153371268~153418497 | 0.279 | 6.064 | 1.33E-09 | 0.175 |
| **DPYSL4** | 10 | 134000413~134019280 | 0.088 | 6.006 | **1.90E-09** | **0.995** |
| ASL | 7 | 65540775~65558329 | 0.180 | -5.232 | 1.68E-07 | 0.265 |
| DPYSL5 | 2 | 27070968~27173219 | 0.240 | 5.179 | 2.23E-07 | 0.000 |
| **NDUFAF1** | 15 | 41679546~41694658 | 0.138 | -5.004 | **5.61E-07** | **0.930** |
| PLCB3 | 11 | 64018994~64036924 | 0.095 | -4.292 | 1.77E-05 | 0.286 |
| UCHL3 | 13 | 76123615~76180156 | 0.273 | -3.519 | 4.34E-04 | 0.040 |
| ADPGK | 15 | 73043707~73076126 | 0.039 | -2.611 | 9.03E-03 | 0.029 |
| MTERFD2 | 2 | 242034544~242041747 | 0.424 | -1.266 | 2.05E-01 | - |
| LRP4 | 11 | 46878267~46940173 | 0.045 | -0.460 | 6.46E-01 | - |
| TFP | **ADCY3** | 2 | 25042038~25142055 | 0.156 | -15.444 | **8.27E-54** | **0.994** |
| **CCDC92** | 12 | 124420954~124457163 | 0.086 | -8.154 | **3.53E-16** | **0.819** |
| VKORC1 | 16 | 31102174~31106276 | 0.029 | -6.108 | 1.01E-09 | 0.364 |
| FAM114A2 | 5 | 153371268~153418497 | 0.279 | 5.636 | 1.74E-08 | 0.184 |
| DPYSL5 | 2 | 27070968~27173219 | 0.240 | 5.622 | 1.88E-08 | 0.004 |
| ASL | 7 | 65540775~65558329 | 0.180 | -5.588 | 2.29E-08 | 0.281 |
| DPYSL4 | 10 | 134000413~134019280 | 0.088 | 5.368 | **7.96E-08** | **0.994** |
| SNX32 | 11 | 65601409~65621172 | 0.458 | 4.904 | 9.39E-07 | 0.000 |
| **NDUFAF1** | 15 | 41679546~41694658 | 0.138 | -4.660 | **3.16E-06** | **0.922** |
| PLCB3 | 11 | 64018994~64036924 | 0.095 | -4.014 | 5.97E-05 | 0.284 |
| UCHL3 | 13 | 76123615~76180156 | 0.273 | -3.899 | 9.66E-05 | 0.561 |
| ADPGK | 15 | 73043707~73076126 | 0.039 | -2.870 | 4.15E-03 | 0.031 |
| MTERFD2 | 2 | 242034544~242041747 | 0.424 | -1.355 | 1.76E-01 | - |
| LRP4 | 11 | 46878267~46940173 | 0.045 | -0.387 | 6.98E-01 | - |
| BMI | **ADCY3** | 2 | 25042038~25142055 | 0.156 | -20.600 | **4.82E-94** | **0.997** |
| SULT1A1 | 16 | 28616907~28634907 | 0.090 | -15.624 | 5.00E-55 | 0.008 |
| VKORC1 | 16 | 31102174~31106276 | 0.029 | -8.995 | 2.36E-19 | 0.343 |
| **DPYSL4** | 10 | 134000413~134019280 | 0.088 | 6.593 | **4.30E-11** | **0.995** |
| C3orf18 | 3 | 50595455~50608458 | 0.034 | -5.916 | 3.29E-09 | 0.016 |
| **PIP4K2A** | 10 | 22823765~23003503 | 0.197 | -5.330 | **9.81E-08** | **0.998** |
| PLCB3 | 11 | 64018994~64036924 | 0.095 | -4.680 | 2.87E-06 | 0.072 |
| ARL3 | 10 | 104433483~104474190 | 0.032 | -4.262 | 2.03E-05 | 0.004 |
| GPX1 | 3 | 49394608~49395791 | 0.120 | 3.833 | 1.27E-04 | 0.000 |
| NDUFAF1 | 15 | 41679546~41694658 | 0.138 | -3.058 | 2.23E-03 | 0.102 |
| ADPGK | 15 | 73043707~73076126 | 0.039 | -0.086 | 9.31E-01 | - |
| VAT | **ADCY3** | 2 | 25042038~25142055 | 0.156 | -12.128 | **7.52E-34** | **0.996** |
| SNX32 | 11 | 65601409~65621172 | 0.458 | 6.930 | 4.21E-12 | 0.395 |
| VKORC1 | 16 | 31102174~31106276 | 0.029 | -5.967 | 2.42E-09 | 0.362 |
| FAM114A2 | 5 | 153371268~153418497 | 0.279 | 5.447 | 5.12E-08 | 0.087 |
| **DPYSL4** | 10 | 134000413~134019280 | 0.088 | 5.269 | **1.37E-07** | **0.993** |
| DPYSL5 | 2 | 27070968~27173219 | 0.240 | 5.247 | 1.55E-07 | 0.000 |
| NDUFAF1 | 15 | 41679546~41694658 | 0.138 | -3.841 | 1.22E-04 | 0.639 |
| LYRM4 | 6 | 5108652~5261172 | 0.187 | 3.217 | 1.30E-03 | 0.010 |
| ADPGK | 15 | 73043707~73076126 | 0.039 | -1.660 | 9.70E-02 | - |
| GPX1 | 3 | 49394608~49395791 | 0.120 | 0.978 | 3.28E-01 | - |
| WC | **ADCY3** | 2 | 25042038~25142055 | 0.156 | -14.159 | **1.65E-45** | **0.996** |
| **HSD17B12** | 11 | 43702142~43878169 | 0.443 | -8.651 | **5.10E-18** | **0.977** |
| **DPYSL4** | 10 | 134000413~134019280 | 0.088 | 6.507 | **7.69E-11** | **0.995** |
| SNX32 | 11 | 65601409~65621172 | 0.458 | 6.217 | 5.07E-10 | 0.002 |
| DPYSL5 | 2 | 27070968~27173219 | 0.240 | 5.365 | 8.10E-08 | 0.000 |
| **LSM6** | 4 | 147096834~147111213 | 0.094 | 4.964 | **6.92E-07** | **0.979** |
| CPNE1 | 20 | 34220232~34262539 | 0.242 | -4.864 | 1.15E-06 | 0.733 |
| PLCB3 | 11 | 64018994~64036924 | 0.095 | -3.717 | 2.02E-04 | 0.273 |
| LYRM4 | 6 | 5108652~5261172 | 0.187 | 3.484 | 4.94E-04 | 0.060 |
| ADPGK | 15 | 73043707~73076126 | 0.039 | -1.015 | 3.10E-01 | - |
| WHR | **CCDC92** | 12 | 124420954~124457163 | 0.086 | 9.890 | **4.76E-23** | **0.880** |
| SULT1A1 | 16 | 28616907~28634907 | 0.090 | -8.814 | 1.21E-18 | 0.034 |
| JMJD7 | 15 | 42120282~42132428 | 0.095 | 6.180 | 6.42E-10 | 0.632 |
| SNX32 | 11 | 65601409~65621172 | 0.458 | 5.899 | 3.67E-09 | 0.000 |
| **HSD17B12** | 11 | 43702142~43878169 | 0.443 | -5.766 | **8.11E-09** | **0.921** |
| **DAGLB** | 7 | 6448746~6523849 | 0.093 | -5.368 | **7.95E-08** | **0.961** |
| SHMT1 | 17 | 18231186~18266856 | 0.216 | -3.946 | 7.95E-05 | 0.000 |
| **ANXA5** | 4 | 122589151~122618147 | 0.475 | 3.345 | **8.22E-04** | **0.961** |

The bonferroni correction threshold for transcriptome analysis is P < 0.05/number of genes analyzed per phenotype. BFP bonferroni correction threshold is 0.05/13; TFP bonferroni correction threshold is 0.05/14; BMI bonferroni correction threshold is 0.05/11; VAT bonferroni correction threshold is 0.05/10; WC bonferroni correction threshold is 0.05/10; WHR bonferroni correction threshold is 0.05/8. "-": Not available. The bolded genes represent the successfully replicated brain protein-coding genes at the human brain transcriptional level.
