# Supplementary material for: Human Brain Proteome-wide Association Study Provides Insights into the Genetic Components of Protein Abundance in Obesity
Source: Research Square preprint supplement (doi:10.21203/rs.3.rs-3975196/v1), 2024-03-04
Supplement: Supplementary file 9 [file a7f1fc6627eb1cd5736ad414.docx]

**Supplementary Table 9a: Inconsistent Results Before and After Filtering for AD-related SNPs**

| **Gene** | **Phenotype** | **After filter** | **ROSMAP** | | | | | | | **BANNER** | | | | | | |
| --- | --- | --- | --- | --- | --- | --- | --- | --- | --- | --- | --- | --- | --- | --- | --- | --- |
| **PWAS.Z** | **PWAS.P** | **COLOC.PP0** | **COLOC.PP1** | **COLOC.PP2** | **COLOC.PP3** | **COLOC.PP4** | **PWAS.Z** | **PWAS.P** | **COLOC.PP0** | **COLOC.PP1** | **COLOC.PP2** | **COLOC.PP3** | **COLOC.PP4** |
| *TMEM106B* | BMI | NO | **-4.441** | **8.97E-06** | 0.000 | 0.177 | 0.000 | 0.013 | **0.810** | -4.021 | 5.81E-05 | 0.000 | 0.103 | 0.000 | 0.007 | **0.890** |
| *TMEM106B* | BMI | YES | **-4.464** | **8.03E-06** | 0.000 | 0.154 | 0.000 | 0.012 | **0.834** | -4.021 | 5.81E-05 | 0.000 | 0.097 | 0.000 | 0.007 | **0.895** |
