# Supplementary material for: Human Brain Proteome-wide Association Study Provides Insights into the Genetic Components of Protein Abundance in Obesity
Source: Research Square preprint supplement (doi:10.21203/rs.3.rs-3975196/v1), 2024-03-04
Supplement: Supplementary file 10 [file af31126a8717bafa545e7555.docx]

**Supplementary Table 1: Proteome-wide Significant Genes for Body Fat Percentage**

| **Gene** | **CHR** | **Position** | **ROSMAP (Discovery)** | | | | | | | | **BANNER (Replication)** | | | | | | | |
| --- | --- | --- | --- | --- | --- | --- | --- | --- | --- | --- | --- | --- | --- | --- | --- | --- | --- | --- |
| **HSQ** | **PWAS.Z** | **PWAS.P** | **COLOC.PP0** | **COLOC.PP1** | **COLOC.PP2** | **COLOC.PP3** | **COLOC.PP4** | **HSQ** | **PWAS.Z** | **PWAS.P** | **COLOC.PP0** | **COLOC.PP1** | **COLOC.PP2** | **COLOC.PP3** | **COLOC.PP4** |
| ***ADCY3*** | 2 | 25042038~25142708 | 0.074 | -12.995 | 1.31E-38 | 0.000 | 0.000 | 0.036 | 0.021 | 0.943 | 0.129 | -16.065 | **4.48E-58** | 0.000 | 0.000 | 0.040 | 0.010 | **0.950** |
| ***CCDC92*** | 12 | 124403207~124457378 | 0.064 | -12.448 | 1.43E-35 | 0.000 | 0.000 | 0.000 | 0.030 | 0.970 | 0.450 | -10.900 | **1.15E-27** | 0.000 | 0.000 | 0.000 | 0.176 | **0.824** |
| *SULT1A1* | 16 | 28616903~28634946 | 0.361 | -10.590 | 3.30E-26 | 0.000 | 0.000 | 0.000 | 0.993 | 0.007 | - | - | - | - | - | - | - | - |
| *MON1A* | 3 | 49946302~49967606 | 0.020 | -8.447 | 3.00E-17 | 0.000 | 0.000 | 0.458 | 0.041 | 0.501 | - | - | - | - | - | - | - | - |
| *MADD* | 11 | 47290712~47351582 | 0.368 | 8.364 | 6.07E-17 | 0.000 | 0.000 | 0.000 | 1.000 | 0.000 | - | - | - | - | - | - | - | - |
| *SKIV2L* | 6 | 31926857~31937532 | 0.103 | 7.775 | 7.54E-15 | 0.000 | 0.000 | 0.016 | 0.011 | 0.973 | - | - | - | - | - | - | - | - |
| ***MAP2K2*** | 19 | 4090319~4124126 | 0.048 | -7.722 | 1.14E-14 | 0.000 | 0.000 | 0.059 | 0.006 | 0.935 | 0.137 | -7.290 | **3.11E-13** | 0.000 | 0.000 | 0.054 | 0.092 | **0.854** |
| ***VKORC1*** | 16 | 31102163~31107301 | 0.064 | -7.611 | 2.72E-14 | 0.000 | 0.000 | 0.093 | 0.027 | 0.879 | 0.053 | -9.448 | **3.46E-21** | 0.000 | 0.000 | 0.105 | 0.019 | **0.876** |
| *DOC2A* | 16 | 30016830~30034591 | 0.062 | 7.590 | 3.20E-14 | 0.000 | 0.000 | 0.000 | 0.306 | 0.694 | - | - | - | - | - | - | - | - |
| *AAGAB* | 15 | 67493371~67547533 | 0.052 | 7.584 | 3.34E-14 | 0.000 | 0.000 | 0.002 | 0.032 | 0.965 | - | - | - | - | - | - | - | - |
| *CSDC2* | 22 | 41956767~41973745 | 0.179 | 7.582 | 3.41E-14 | 0.000 | 0.000 | 0.000 | 0.498 | 0.502 | - | - | - | - | - | - | - | - |
| ***ADPGK*** | 15 | 73043710~73078187 | 0.103 | 7.407 | 1.29E-13 | 0.000 | 0.000 | 0.007 | 0.172 | 0.821 | 0.120 | 5.423 | **5.85E-08** | 0.000 | 0.000 | 0.118 | 0.017 | **0.865** |
| ***PLCB3*** | 11 | 64018995~64036622 | 0.048 | -7.290 | 3.09E-13 | 0.000 | 0.000 | 0.014 | 0.014 | 0.972 | 0.067 | -6.092 | **1.12E-09** | 0.000 | 0.000 | 0.082 | 0.038 | **0.880** |
| *XRCC6* | 22 | 42017123~42060044 | 0.026 | -7.148 | 8.82E-13 | 0.000 | 0.000 | 0.215 | 0.034 | 0.751 | - | - | - | - | - | - | - | - |
| *SLC9A3R2* | 16 | 2075357~2089027 | 0.094 | 6.658 | 2.77E-11 | 0.000 | 0.000 | 0.007 | 0.016 | 0.977 | - | - | - | - | - | - | - | - |
| *BCL2L13* | 22 | 18111621~18213388 | 0.204 | -6.605 | 3.96E-11 | 0.000 | 0.000 | 0.000 | 0.045 | 0.955 | 0.218 | -1.029 | 3.03E-01 | - | - | - | - | - |
| ***B3GAT3*** | 11 | 62382768~62389647 | 0.083 | 6.572 | 4.98E-11 | 0.000 | 0.000 | 0.000 | 0.012 | 0.987 | 0.176 | 5.756 | **8.63E-09** | 0.000 | 0.000 | 0.005 | 0.012 | **0.983** |
| *ADCY9* | 16 | 4003388~4166186 | 0.076 | -6.441 | 1.19E-10 | 0.000 | 0.000 | 0.116 | 0.271 | 0.613 | - | - | - | - | - | - | - | - |
| *CPNE3* | 8 | 87497059~87573726 | 0.147 | -6.425 | 1.32E-10 | 0.000 | 0.000 | 0.000 | 0.004 | 0.996 | 0.157 | -4.771 | 1.84E-06 | 0.006 | 0.001 | 0.601 | 0.059 | 0.335 |
| *SBF2* | 11 | 9800214~10315754 | 0.065 | -6.423 | 1.33E-10 | 0.000 | 0.000 | 0.589 | 0.085 | 0.326 | - | - | - | - | - | - | - | - |
| *GPX1* | 3 | 49394609~49396033 | 0.423 | 6.372 | 1.86E-10 | 0.000 | 0.000 | 0.000 | 1.000 | 0.000 | - | - | - | - | - | - | - | - |
| *CADPS2* | 7 | 121958481~122526813 | 0.057 | 6.323 | 2.57E-10 | 0.004 | 0.000 | 0.757 | 0.062 | 0.177 | - | - | - | - | - | - | - | - |
| *RUFY1* | 5 | 178977559~179037027 | 0.092 | 6.322 | 2.58E-10 | 0.000 | 0.000 | 0.003 | 0.005 | 0.992 | - | - | - | - | - | - | - | - |
| *SRSF9* | 12 | 120899471~120907596 | 0.278 | 6.282 | 3.34E-10 | 0.000 | 0.000 | 0.000 | 0.000 | 1.000 | - | - | - | - | - | - | - | - |
| *HIP1R* | 12 | 123319000~123347507 | 0.198 | -6.171 | 6.78E-10 | 0.000 | 0.000 | 0.000 | 0.000 | 1.000 | 0.079 | -6.498 | 8.13E-11 | 0.008 | 0.000 | 0.703 | 0.018 | 0.272 |
| *LMOD1* | 1 | 201865580~201915715 | 0.049 | -6.170 | 6.84E-10 | 0.000 | 0.000 | 0.085 | 0.016 | 0.899 | 0.306 | -5.191 | 2.10E-07 | 0.000 | 0.000 | 0.310 | 0.164 | 0.526 |
| *CRTAC1* | 10 | 99624757~99790585 | 0.153 | -6.159 | 7.33E-10 | 0.000 | 0.000 | 0.003 | 0.939 | 0.059 | - | - | - | - | - | - | - | - |
| *AK5* | 1 | 77747736~78025651 | 0.122 | -6.123 | 9.21E-10 | 0.000 | 0.000 | 0.000 | 1.000 | 0.000 | - | - | - | - | - | - | - | - |
| *SNX19* | 11 | 130745331~130786404 | 0.095 | 6.116 | 9.60E-10 | 0.000 | 0.000 | 0.003 | 0.959 | 0.038 | - | - | - | - | - | - | - | - |
| ***NDUFAF1*** | 15 | 41679551~41694717 | 0.261 | -6.087 | 1.15E-09 | 0.000 | 0.000 | 0.000 | 0.027 | 0.973 | 0.414 | -5.929 | **3.05E-09** | 0.000 | 0.000 | 0.002 | 0.021 | **0.977** |
| *HSD17B12* | 11 | 43577986~43878167 | 0.325 | -6.026 | 1.68E-09 | 0.000 | 0.000 | 0.000 | 1.000 | 0.000 | - | - | - | - | - | - | - | - |
| *FTO* | 16 | 53737875~54155853 | 0.131 | 5.950 | 2.68E-09 | 0.000 | 0.000 | 0.574 | 0.401 | 0.024 | - | - | - | - | - | - | - | - |
| *TRAF3* | 14 | 103243813~103377837 | 0.087 | 5.868 | 4.42E-09 | 0.000 | 0.000 | 0.000 | 0.002 | 0.998 | 0.227 | 2.380 | 1.73E-02 | 0.000 | 0.000 | 0.348 | 0.071 | 0.582 |
| ***PSMD9*** | 12 | 122326637~122356203 | 0.177 | 5.798 | 6.72E-09 | 0.000 | 0.000 | 0.000 | 0.009 | 0.991 | 0.193 | 6.282 | **3.34E-10** | 0.000 | 0.000 | 0.000 | 0.019 | **0.980** |
| *TTC38* | 22 | 46663858~46689905 | 0.268 | -5.729 | 1.01E-08 | 0.000 | 0.000 | 0.000 | 1.000 | 0.000 | - | - | - | - | - | - | - | - |
| *NFU1* | 2 | 69622882~69664760 | 0.074 | 5.694 | 1.24E-08 | 0.000 | 0.000 | 0.002 | 0.286 | 0.713 | - | - | - | - | - | - | - | - |
| *STAT6* | 12 | 57489191~57525922 | 0.137 | 5.633 | 1.77E-08 | 0.000 | 0.000 | 0.000 | 0.031 | 0.969 | 0.217 | 4.010 | 6.06E-05 | 0.001 | 0.000 | 0.542 | 0.202 | 0.255 |
| ***DPYSL4*** | 10 | 134000404~134019280 | 0.121 | 5.543 | 2.97E-08 | 0.000 | 0.000 | 0.000 | 0.001 | 0.999 | 0.157 | 6.917 | **4.62E-12** | 0.000 | 0.000 | 0.009 | 0.019 | **0.972** |
| *CTNND1* | 11 | 57520715~57587018 | 0.056 | -5.536 | 3.09E-08 | 0.000 | 0.000 | 0.003 | 0.011 | 0.986 | 0.124 | -3.486 | 4.91E-04 | 0.013 | 0.001 | 0.434 | 0.025 | 0.527 |
| *FAM160B2* | 8 | 21946670~21962409 | 0.047 | -5.496 | 3.89E-08 | 0.000 | 0.000 | 0.068 | 0.014 | 0.918 | - | - | - | - | - | - | - | - |
| *GSTP1* | 11 | 67351066~67354131 | 0.123 | 5.489 | 4.04E-08 | 0.000 | 0.001 | 0.000 | 0.186 | 0.813 | 0.408 | 4.631 | 3.64E-06 | 0.000 | 0.002 | 0.000 | 0.551 | 0.447 |
| ***RAB27B*** | 18 | 52385091~52562747 | 0.162 | -5.451 | 5.00E-08 | 0.000 | 0.000 | 0.000 | 0.012 | 0.988 | 0.105 | -5.204 | **1.96E-07** | 0.000 | 0.000 | 0.028 | 0.013 | **0.959** |
| ***MRPL9*** | 1 | 151732119~151736040 | 0.063 | 5.430 | 5.63E-08 | 0.000 | 0.001 | 0.002 | 0.159 | 0.838 | 0.140 | 5.180 | **2.22E-07** | 0.000 | 0.000 | 0.030 | 0.071 | **0.898** |
| *UHRF1BP1* | 6 | 34759857~34850915 | 0.171 | -5.415 | 6.12E-08 | 0.000 | 0.000 | 0.002 | 0.091 | 0.907 | - | - | - | - | - | - | - | - |
| ***ASL*** | 7 | 65540785~65558545 | 0.223 | -5.406 | 6.46E-08 | 0.000 | 0.018 | 0.000 | 0.067 | 0.915 | 0.392 | -4.793 | **1.64E-06** | 0.000 | 0.032 | 0.000 | 0.103 | **0.865** |
| *DHRS7B* | 17 | 21026677~21096578 | 0.065 | -5.395 | 6.84E-08 | 0.000 | 0.001 | 0.000 | 0.007 | 0.992 | 0.071 | -3.551 | 3.84E-04 | 0.016 | 0.001 | 0.249 | 0.011 | 0.723 |
| *CPLX1* | 4 | 778745~819986 | 0.037 | -5.363 | 8.17E-08 | 0.000 | 0.000 | 0.372 | 0.097 | 0.530 | - | - | - | - | - | - | - | - |
| *AAK1* | 2 | 69688532~69901481 | 0.056 | -5.329 | 9.87E-08 | 0.000 | 0.000 | 0.129 | 0.094 | 0.777 | - | - | - | - | - | - | - | - |
| ***FAM114A2*** | 5 | 153369688~153418496 | 0.102 | 5.303 | 1.14E-07 | 0.000 | 0.000 | 0.000 | 0.059 | 0.941 | 0.179 | 4.444 | **8.81E-06** | 0.000 | 0.000 | 0.000 | 0.055 | **0.945** |
| *COPS7B* | 2 | 232646381~232673963 | 0.028 | 5.296 | 1.18E-07 | 0.017 | 0.002 | 0.299 | 0.039 | 0.643 | - | - | - | - | - | - | - | - |
| *ABHD12* | 20 | 25275379~25371619 | 0.396 | 5.266 | 1.39E-07 | 0.000 | 0.000 | 0.000 | 1.000 | 0.000 | - | - | - | - | - | - | - | - |
| *SLC30A9* | 4 | 41992489~42092474 | 0.125 | 5.256 | 1.48E-07 | 0.007 | 0.022 | 0.007 | 0.023 | 0.942 | 0.084 | 2.623 | 8.72E-03 | 0.243 | 0.050 | 0.241 | 0.050 | 0.416 |
| *TNC* | 9 | 117782806~117880536 | 0.050 | 5.236 | 1.64E-07 | 0.000 | 0.000 | 0.067 | 0.083 | 0.850 | 0.194 | 1.897 | 5.78E-02 | - | - | - | - | - |
| *MESDC2* | 15 | 81239667~81282219 | 0.101 | 5.233 | 1.67E-07 | 0.000 | 0.000 | 0.000 | 0.005 | 0.995 | 0.143 | 2.177 | 2.95E-02 | 0.013 | 0.000 | 0.297 | 0.009 | 0.681 |
| ***SLC25A12*** | 2 | 172640880~172864766 | 0.104 | -5.218 | 1.81E-07 | 0.000 | 0.000 | 0.000 | 0.139 | 0.860 | 0.126 | -4.983 | **6.26E-07** | 0.000 | 0.000 | 0.022 | 0.023 | **0.955** |
| *RABEP1* | 17 | 5185558~5289129 | 0.107 | 5.212 | 1.87E-07 | 0.000 | 0.001 | 0.000 | 0.685 | 0.314 | - | - | - | - | - | - | - | - |
| *CSE1L* | 20 | 47662849~47713489 | 0.123 | 5.197 | 2.02E-07 | 0.000 | 0.000 | 0.000 | 0.006 | 0.994 | 0.162 | 3.447 | 5.66E-04 | 0.000 | 0.000 | 0.037 | 0.410 | 0.552 |
| *MKRN2* | 3 | 12598513~12625212 | 0.180 | 5.152 | 2.58E-07 | 0.000 | 0.093 | 0.000 | 0.068 | 0.838 | 0.108 | 4.248 | 2.15E-05 | 0.475 | 0.017 | 0.351 | 0.012 | 0.145 |
| *NQO1* | 16 | 69740899~69760854 | 0.536 | -5.113 | 3.17E-07 | 0.000 | 0.000 | 0.000 | 1.000 | 0.000 | - | - | - | - | - | - | - | - |
| *PEPD* | 19 | 33877856~34012700 | 0.338 | 5.098 | 3.44E-07 | 0.000 | 0.000 | 0.000 | 1.000 | 0.000 | - | - | - | - | - | - | - | - |
| *CNNM2* | 10 | 104678050~104849978 | 0.145 | 5.095 | 3.48E-07 | 0.000 | 0.763 | 0.000 | 0.034 | 0.203 | - | - | - | - | - | - | - | - |
| *CHORDC1* | 11 | 89934328~89956532 | 0.080 | -5.050 | 4.43E-07 | 0.003 | 0.001 | 0.340 | 0.078 | 0.579 | - | - | - | - | - | - | - | - |
| *CCDC127* | 5 | 196986~218330 | 0.337 | -5.049 | 4.44E-07 | 0.000 | 0.017 | 0.000 | 0.979 | 0.004 | - | - | - | - | - | - | - | - |
| *SYTL2* | 11 | 85405267~85522184 | 0.230 | 4.990 | 6.03E-07 | 0.010 | 0.005 | 0.643 | 0.289 | 0.054 | - | - | - | - | - | - | - | - |
| *PPTC7* | 12 | 110969120~111021125 | 0.044 | -4.982 | 6.29E-07 | 0.000 | 0.000 | 0.002 | 0.010 | 0.988 | - | - | - | - | - | - | - | - |
| ***GBA2*** | 9 | 35736863~35749983 | 0.279 | 4.967 | 6.80E-07 | 0.000 | 0.007 | 0.000 | 0.006 | 0.988 | 0.409 | 4.710 | **2.48E-06** | 0.000 | 0.007 | 0.000 | 0.006 | **0.987** |
| *SERGEF* | 11 | 17809595~18034709 | 0.249 | 4.959 | 7.09E-07 | 0.000 | 0.636 | 0.000 | 0.183 | 0.181 | - | - | - | - | - | - | - | - |
| *ERAP1* | 5 | 96096521~96143803 | 0.571 | -4.947 | 7.55E-07 | 0.000 | 0.022 | 0.000 | 0.899 | 0.079 | - | - | - | - | - | - | - | - |
| ***UCHL3*** | 13 | 76123619~76180085 | 0.208 | -4.941 | 7.79E-07 | 0.000 | 0.018 | 0.000 | 0.014 | 0.968 | 0.209 | -4.728 | **2.27E-06** | 0.000 | 0.015 | 0.000 | 0.011 | **0.973** |
| ***MTERFD2*** | 2 | 242011584~242041747 | 0.095 | -4.929 | 8.26E-07 | 0.000 | 0.001 | 0.000 | 0.027 | 0.972 | 0.227 | -5.407 | **6.40E-08** | 0.000 | 0.001 | 0.001 | 0.025 | **0.973** |
| *SNX32* | 11 | 65601112~65624367 | 0.285 | 4.924 | 8.47E-07 | 0.000 | 0.003 | 0.000 | 0.156 | 0.841 | 0.342 | 5.973 | 2.33E-09 | 0.000 | 0.003 | 0.000 | 0.200 | 0.797 |
| *PLCD3* | 17 | 43186335~43210721 | 0.046 | 4.923 | 8.54E-07 | 0.000 | 0.000 | 0.294 | 0.079 | 0.627 | - | - | - | - | - | - | - | - |
| ***ULK3*** | 15 | 75128457~75135687 | 0.347 | -4.922 | 8.58E-07 | 0.000 | 0.000 | 0.000 | 0.001 | 0.998 | 0.472 | -4.682 | **2.84E-06** | 0.000 | 0.000 | 0.000 | 0.001 | **0.998** |
| *PIN1* | 19 | 9945933~9960358 | 0.032 | -4.918 | 8.74E-07 | 0.003 | 0.000 | 0.213 | 0.013 | 0.771 | - | - | - | - | - | - | - | - |
| *VWA7* | 6 | 31733367~31745108 | 0.683 | 4.885 | 1.03E-06 | 0.000 | 0.000 | 0.042 | 0.685 | 0.273 | - | - | - | - | - | - | - | - |
| *DLG1* | 3 | 196769431~197026171 | 0.214 | -4.873 | 1.10E-06 | 0.000 | 0.001 | 0.002 | 0.996 | 0.002 | - | - | - | - | - | - | - | - |
| *MRPL10* | 17 | 45900638~45908900 | 0.246 | 4.865 | 1.14E-06 | 0.000 | 0.041 | 0.000 | 0.236 | 0.723 | - | - | - | - | - | - | - | - |
| *WBP2* | 17 | 73841780~73852588 | 0.062 | -4.841 | 1.29E-06 | 0.000 | 0.000 | 0.101 | 0.474 | 0.424 | - | - | - | - | - | - | - | - |
| *PLEKHG3* | 14 | 65170820~65213610 | 0.087 | 4.809 | 1.52E-06 | 0.881 | 0.019 | 0.069 | 0.001 | 0.030 | - | - | - | - | - | - | - | - |
| *PTPLB* | 3 | 123209667~123304032 | 0.052 | 4.805 | 1.55E-06 | 0.000 | 0.000 | 0.145 | 0.757 | 0.098 | - | - | - | - | - | - | - | - |
| *MCCC1* | 3 | 182733006~182833863 | 0.370 | 4.757 | 1.97E-06 | 0.000 | 0.026 | 0.000 | 0.503 | 0.471 | - | - | - | - | - | - | - | - |
| *APMAP* | 20 | 24943561~24973615 | 0.038 | 4.748 | 2.05E-06 | 0.000 | 0.000 | 0.342 | 0.442 | 0.216 | - | - | - | - | - | - | - | - |
| *GSTM2* | 1 | 110210644~110252171 | 0.476 | 4.718 | 2.38E-06 | 0.000 | 0.088 | 0.000 | 0.908 | 0.004 | - | - | - | - | - | - | - | - |
| *STX4* | 16 | 31044210~31054296 | 0.047 | -4.714 | 2.43E-06 | 0.000 | 0.000 | 0.629 | 0.329 | 0.042 | - | - | - | - | - | - | - | - |
| *DCUN1D1* | 3 | 182655862~182703741 | 0.037 | 4.712 | 2.45E-06 | 0.004 | 0.005 | 0.073 | 0.094 | 0.824 | - | - | - | - | - | - | - | - |
| *PSMG1* | 21 | 40546695~40555777 | 0.032 | 4.624 | 3.76E-06 | 0.011 | 0.003 | 0.226 | 0.063 | 0.697 | - | - | - | - | - | - | - | - |
| ***DPYSL5*** | 2 | 27070615~27173219 | 0.190 | 4.613 | 3.97E-06 | 0.000 | 0.000 | 0.000 | 0.054 | 0.946 | 0.168 | 5.464 | **4.66E-08** | 0.000 | 0.000 | 0.006 | 0.018 | **0.977** |
| *ASPHD1* | 16 | 29911696~29931185 | 0.300 | 4.607 | 4.09E-06 | 0.000 | 0.000 | 0.000 | 1.000 | 0.000 | - | - | - | - | - | - | - | - |
| ***C9orf64*** | 9 | 86553226~86571901 | 0.252 | 4.607 | 4.09E-06 | 0.000 | 0.003 | 0.000 | 0.039 | 0.958 | 0.141 | 4.109 | **3.98E-05** | 0.001 | 0.000 | 0.012 | 0.005 | **0.982** |
| *LEMD2* | 6 | 33738979~33756913 | 0.074 | -4.593 | 4.38E-06 | 0.000 | 0.000 | 0.001 | 0.489 | 0.510 | - | - | - | - | - | - | - | - |
| *MERTK* | 2 | 112656056~112787138 | 0.031 | -4.582 | 4.60E-06 | 0.027 | 0.012 | 0.050 | 0.021 | 0.889 | 0.119 | -3.246 | 1.17E-03 | 0.020 | 0.292 | 0.036 | 0.531 | 0.121 |
| *LIME1* | 20 | 62366815~62370456 | 0.071 | 4.577 | 4.73E-06 | 0.000 | 0.000 | 0.050 | 0.010 | 0.940 | 0.078 | 4.519 | 6.23E-06 | 0.000 | 0.000 | 0.423 | 0.066 | 0.511 |
| *TDRKH* | 1 | 151742583~151763892 | 0.044 | 4.571 | 4.86E-06 | 0.000 | 0.001 | 0.052 | 0.106 | 0.842 | - | - | - | - | - | - | - | - |
| *SMCHD1* | 18 | 2655737~2805015 | 0.053 | -4.569 | 4.91E-06 | 0.152 | 0.008 | 0.628 | 0.032 | 0.181 | - | - | - | - | - | - | - | - |
| *IGFBP2* | 2 | 217497551~217529159 | 0.079 | 4.560 | 5.13E-06 | 0.012 | 0.007 | 0.005 | 0.002 | 0.975 | - | - | - | - | - | - | - | - |
| *RANGAP1* | 22 | 41641615~41682255 | 0.036 | 4.550 | 5.37E-06 | 0.000 | 0.000 | 0.559 | 0.073 | 0.367 | - | - | - | - | - | - | - | - |
| *CDC42BPB* | 14 | 103398716~103523799 | 0.065 | 4.548 | 5.42E-06 | 0.000 | 0.000 | 0.028 | 0.070 | 0.903 | - | - | - | - | - | - | - | - |
| *SRR* | 17 | 2206677~2228554 | 0.211 | 4.545 | 5.49E-06 | 0.000 | 0.202 | 0.000 | 0.035 | 0.763 | - | - | - | - | - | - | - | - |
| ***PFKM*** | 12 | 48498922~48540187 | 0.228 | -4.530 | 5.89E-06 | 0.000 | 0.014 | 0.000 | 0.036 | 0.951 | 0.291 | -4.617 | **3.88E-06** | 0.000 | 0.006 | 0.000 | 0.014 | **0.980** |
| *DIP2B* | 12 | 50898768~51142450 | 0.077 | -4.528 | 5.96E-06 | 0.000 | 0.006 | 0.000 | 0.008 | 0.986 | 0.105 | -3.187 | 1.44E-03 | 0.076 | 0.004 | 0.215 | 0.010 | 0.695 |
| *FXN* | 9 | 71650175~71715094 | 0.268 | -4.452 | 8.52E-06 | 0.000 | 0.941 | 0.000 | 0.001 | 0.057 | - | - | - | - | - | - | - | - |
| *ARHGAP12* | 10 | 32094365~32217742 | 0.042 | 4.444 | 8.85E-06 | 0.072 | 0.056 | 0.022 | 0.016 | 0.834 | - | - | - | - | - | - | - | - |
| *IDUA* | 4 | 980785~998316 | 0.286 | -4.443 | 8.89E-06 | 0.000 | 0.000 | 0.000 | 0.031 | 0.969 | - | - | - | - | - | - | - | - |
| *TTC19* | 17 | 15902694~15948329 | 0.033 | 4.437 | 9.13E-06 | 0.006 | 0.003 | 0.093 | 0.046 | 0.853 | 0.123 | 3.305 | 9.50E-04 | 0.037 | 0.002 | 0.564 | 0.025 | 0.372 |
| *TUBA4A* | 2 | 220114433~220142892 | 0.024 | 4.434 | 9.24E-06 | 0.550 | 0.060 | 0.293 | 0.032 | 0.064 | - | - | - | - | - | - | - | - |
| *ARSB* | 5 | 78073032~78281910 | 0.459 | 4.430 | 9.41E-06 | 0.000 | 0.218 | 0.000 | 0.597 | 0.185 | - | - | - | - | - | - | - | - |
| *MGMT* | 10 | 131265448~131566271 | 0.609 | 4.430 | 9.43E-06 | 0.000 | 0.001 | 0.000 | 0.005 | 0.995 | 0.518 | 3.277 | 1.05E-03 | 0.000 | 0.129 | 0.000 | 0.854 | 0.017 |
| *LYZ* | 12 | 69742121~69748014 | 0.034 | 4.429 | 9.49E-06 | 0.152 | 0.048 | 0.182 | 0.057 | 0.560 | - | - | - | - | - | - | - | - |
| *NFXL1* | 4 | 47849257~47916653 | 0.099 | -4.396 | 1.10E-05 | 0.000 | 0.357 | 0.000 | 0.023 | 0.620 | - | - | - | - | - | - | - | - |
| *HARS2* | 5 | 140071011~140078889 | 0.027 | -4.386 | 1.16E-05 | 0.314 | 0.043 | 0.128 | 0.017 | 0.498 | - | - | - | - | - | - | - | - |
| *CD14* | 5 | 140011313~140013286 | 0.043 | -4.376 | 1.21E-05 | 0.565 | 0.045 | 0.221 | 0.018 | 0.151 | - | - | - | - | - | - | - | - |
| *ACOT13* | 6 | 24667263~24705293 | 0.052 | -4.366 | 1.27E-05 | 0.766 | 0.081 | 0.054 | 0.006 | 0.093 | - | - | - | - | - | - | - | - |
| *H1F0* | 22 | 38201114~38203442 | 0.032 | 4.357 | 1.32E-05 | 0.002 | 0.000 | 0.474 | 0.014 | 0.509 | - | - | - | - | - | - | - | - |
| *OLA1* | 2 | 174937175~175113426 | 0.071 | 4.345 | 1.39E-05 | 0.000 | 0.000 | 0.001 | 0.014 | 0.985 | - | - | - | - | - | - | - | - |
| *CTSF* | 11 | 66330934~66336312 | 0.039 | -4.327 | 1.51E-05 | 0.921 | 0.071 | 0.002 | 0.000 | 0.005 | - | - | - | - | - | - | - | - |
| *ANO3* | 11 | 26210829~26684835 | 0.063 | -4.313 | 1.61E-05 | 0.886 | 0.107 | 0.005 | 0.001 | 0.002 | - | - | - | - | - | - | - | - |
| *LYRM4* | 6 | 5102827~5261172 | 0.336 | 4.303 | 1.69E-05 | 0.000 | 0.219 | 0.000 | 0.005 | 0.776 | - | - | - | - | - | - | - | - |
| *GSTM1* | 1 | 110230436~110251661 | 0.512 | 4.288 | 1.80E-05 | 0.000 | 0.179 | 0.000 | 0.812 | 0.008 | - | - | - | - | - | - | - | - |
| *SACM1L* | 3 | 45730548~45786916 | 0.061 | 4.288 | 1.80E-05 | 0.610 | 0.032 | 0.111 | 0.006 | 0.241 | - | - | - | - | - | - | - | - |
| *ACE* | 17 | 61554422~61599205 | 0.098 | 4.283 | 1.84E-05 | 0.000 | 0.003 | 0.002 | 0.973 | 0.022 | - | - | - | - | - | - | - | - |
| *RASGRF1* | 15 | 79252289~79383115 | 0.032 | 4.283 | 1.84E-05 | 0.091 | 0.022 | 0.054 | 0.012 | 0.821 | - | - | - | - | - | - | - | - |
| ***LRP4*** | 11 | 46878419~46940193 | 0.071 | -4.282 | 1.85E-05 | 0.003 | 0.002 | 0.053 | 0.031 | 0.912 | 0.085 | -4.316 | **1.59E-05** | 0.001 | 0.001 | 0.029 | 0.018 | **0.950** |
| *GRID1* | 10 | 87359312~88126250 | 0.208 | -4.257 | 2.08E-05 | 0.000 | 0.001 | 0.000 | 0.999 | 0.000 | - | - | - | - | - | - | - | - |
| ***PANK4*** | 1 | 2439972~2458039 | 0.087 | 4.239 | 2.25E-05 | 0.000 | 0.027 | 0.000 | 0.100 | 0.872 | 0.421 | 4.267 | **1.98E-05** | 0.000 | 0.005 | 0.000 | 0.017 | **0.978** |
| *ABCG2* | 4 | 89011416~89152474 | 0.143 | 4.196 | 2.71E-05 | 0.000 | 0.090 | 0.000 | 0.374 | 0.536 | - | - | - | - | - | - | - | - |

HSQ: Heritability of the gene; "-": The brain protein-coding gene is not available in the replication cohort. The bonferroni correction threshold for discovery cohort is P < 0.05/1752 = 2.854 × 10-5. The bonferroni correction threshold for replication cohort is P < 0.05/44 = 1.136 × 10-3. The bolded genes represent the successfully replicated brain protein-coding genes.
