# Supplementary material for: Human Brain Proteome-wide Association Study Provides Insights into the Genetic Components of Protein Abundance in Obesity
Source: Research Square preprint supplement (doi:10.21203/rs.3.rs-3975196/v1), 2024-03-04
Supplement: Supplementary file 11 [file ccbccfe012ee7af1720a3b23.docx]

**Supplementary Table 10: The Association Results for Previously Reported Genes**

| **Gene** | **Gagnon’s study (Mendelian randomization+Colocalization)** | | | | **This study (Proteome-wide association study+Colocalization)** | | | | |
| --- | --- | --- | --- | --- | --- | --- | --- | --- | --- |
| **Phenotype** | **BETA** | ***P*** | **PPH4** | **Related phenotype(s)** | **Lead phenotype** | **Z** | ***P*** | **PPH4** |
| *AARS1* | BMI | 0.720 | 3.90E-19 | 1.000 | - | - | - | - | - |
| ***ABCG2*** | BMI | 0.160 | 4.80E-13 | 0.980 | BMI, WC | BMI | 7.415 | 1.22E-13 | 0.998 |
| ***ACSF3*** | BMI | 0.110 | 4.00E-06 | 0.920 | BFP, TFP, BMI | BMI | 3.782 | 1.56E-04 | 0.940 |
| ***ACTR1B*** | BMI | -0.190 | 1.50E-06 | 0.990 | BMI | BMI | -4.315 | 1.60E-05 | 0.988 |
| *APOE* | BMI | 0.061 | 1.70E-26 | 0.990 | - | - | - | - | - |
| ***ARL3*** | BMI | -0.490 | 2.10E-13 | 0.970 | BMI | BMI | -5.678 | 1.36E-08 | 0.988 |
| ***BCL2L13*** | BMI | -0.170 | 1.50E-09 | 0.990 | BFP, TFP, BMI, VAT, WC | BFP | -6.605 | 3.96E-11 | 0.955 |
| ***CCDC92*** | BMI | -0.240 | 6.30E-05 | 0.870 | WHR | WHR | 15.228 | 2.30E-52 | 0.952 |
| ***CNNM2*** | BMI | 0.690 | 1.60E-19 | 0.980 | BMI | BMI | 10.230 | 1.46E-24 | 0.988 |
| ***COMT*** | BMI | -0.090 | 1.30E-08 | 1.000 | BMI, WC | BMI | -5.659 | 1.53E-08 | 0.998 |
| ***COQ6*** | BMI | 0.120 | 1.30E-05 | 0.920 | BMI | BMI | 4.946 | 7.60E-07 | 0.893 |
| ***CPNE3*** | BMI | -0.230 | 2.80E-06 | 0.990 | BFP, TFP, BMI, VAT, WC | BFP | -6.425 | 1.32E-10 | 0.996 |
| ***CSE1L*** | BMI | 0.520 | 5.80E-11 | 0.980 | BFP, TFP, BMI | BFP | 5.197 | 2.02E-07 | 0.994 |
| *DHRS11* | BMI | 0.220 | 1.50E-23 | 0.980 | - | - | - | - | - |
| ***DNAJC11*** | BMI | 0.390 | 1.20E-08 | 0.820 | WC, WHR | WC | 4.025 | 5.70E-05 | 0.978 |
| ***DOC2A*** | BMI | 0.620 | 1.90E-33 | 0.970 | VAT, WC, WHR | WC | 13.600 | 4.00E-42 | 0.927 |
| ***DPYSL4*** | BMI | 0.270 | 5.10E-14 | 1.000 | BFP, TFP, BMI, VAT, WC | BMI | 6.232 | 4.60E-10 | 0.999 |
| ***DPYSL5*** | BMI | 0.250 | 2.00E-08 | 0.820 | BFP, TFP, BMI, VAT, WC, WHR | VAT | 5.067 | 4.05E-07 | 0.952 |
| *EIF5B* | BMI | -0.290 | 7.80E-06 | 0.930 | - | - | - | - | - |
| *ERAP1* | BMI | 0.011 | 5.20E-08 | 0.800 | - | - | - | - | - |
| ***FARP1*** | BMI | 0.370 | 1.10E-11 | 0.990 | BFP, TFP, BMI, VAT | TFP | 3.755 | 1.73E-04 | 0.939 |
| ***GBA2*** | BMI | 0.140 | 5.90E-06 | 0.930 | BFP, TFP, BMI | BFP | 4.967 | 6.80E-07 | 0.988 |
| ***GPX1*** | BMI | 0.200 | 5.30E-17 | 0.990 | BMI, VAT | BMI | 7.769 | 7.93E-15 | 0.992 |
| *GSTM2* | BMI | 0.095 | 2.50E-07 | 1.000 | - | - | - | - | - |
| *GSTM5* | BMI | 0.030 | 2.50E-07 | 1.000 | - | - | - | - | - |
| ***HINT1*** | BMI | -0.260 | 9.60E-09 | 0.980 | BMI, WC | WC | -5.422 | 5.89E-08 | 0.990 |
| *IFT27* | BMI | -0.170 | 3.80E-05 | 0.820 | - | - | - | - | - |
| ***LYRM4*** | BMI | 0.120 | 7.70E-06 | 0.870 | BMI, VAT, WC | WC | 4.940 | 7.80E-07 | 0.981 |
| ***MKRN1*** | BMI | 0.210 | 7.70E-06 | 0.960 | BMI | BMI | 3.541 | 3.98E-04 | 0.954 |
| ***NDUFAF1*** | BMI | -0.110 | 3.40E-07 | 0.980 | BFP, TFP, BMI, VAT | BFP | -6.087 | 1.15E-09 | 0.973 |
| ***OLA1*** | BMI | 0.610 | 1.70E-12 | 0.990 | BFP, TFP, BMI, VAT, WC | BMI | 5.139 | 2.76E-07 | 0.958 |
| ***PANK4*** | BMI | 0.360 | 1.20E-17 | 1.000 | BFP, BMI, VAT, WC | BMI | 6.843 | 7.77E-12 | 0.994 |
| ***PCYT1A*** | BMI | 0.350 | 4.40E-07 | 0.920 | VAT | VAT | 5.193 | 2.07E-07 | 0.976 |
| ***PIP4K2A*** | BMI | -0.058 | 2.30E-06 | 0.900 | BMI | BMI | -4.767 | 1.87E-06 | 0.916 |
| *PLPP3* | BMI | 0.110 | 5.70E-08 | 0.990 | - | - | - | - | - |
| ***PSMD9*** | BMI | 0.270 | 2.20E-06 | 0.980 | BFP, TFP, BMI, WC | BFP | 5.798 | 6.72E-09 | 0.991 |
| ***PTGR2*** | BMI | -0.090 | 1.30E-05 | 0.940 | BMI | BMI | -3.934 | 8.37E-05 | 0.851 |
| *RAB23* | BMI | 0.290 | 9.00E-06 | 0.910 | - | - | - | - | - |
| ***RAB27B*** | BMI | -0.150 | 4.50E-17 | 0.990 | BFP, TFP, BMI, VAT, WC | BMI | -7.199 | 6.08E-13 | 0.988 |
| *RABEP1* | BMI | 0.310 | 4.20E-05 | 0.950 | - | - | - | - | - |
| ***SLC25A12*** | BMI | -0.440 | 1.60E-11 | 0.930 | BFP, TFP, BMI, WC | BMI | -6.384 | 1.72E-10 | 0.969 |
| ***STAT6*** | BMI | 0.250 | 6.80E-06 | 0.970 | BFP, TFP, BMI | BFP | 5.633 | 1.77E-08 | 0.969 |
| ***TMEM106B*** | BMI | -0.050 | 3.60E-06 | 0.950 | BMI | BMI | -4.464 | 8.03E-06 | 0.834 |
| *TRAP1* | BMI | -0.160 | 2.40E-10 | 0.990 | - | - | - | - | - |
| *TRIM47* | BMI | -0.150 | 2.60E-10 | 1.000 | - | - | - | - | - |
| ***TYK2*** | BMI | -0.110 | 2.20E-06 | 0.990 | BMI | BMI | -4.863 | 1.16E-06 | 0.981 |
| ***ULK3*** | BMI | -0.150 | 1.40E-09 | 0.990 | BFP, TFP, BMI, VAT, WC | WC | -5.947 | 2.73E-09 | 0.999 |

PPH4, posterior probability of H4 in colocalization test; Lead phenotype, most significant phenotype in proteome-wide association studies; "-": Not available; Related phenotype(s), nominally significant phenotype at discovery stage (*P* < 0.05). The bolded genes represent overlapping genes in the two studies.
