# Supplementary material for: Human Brain Proteome-wide Association Study Provides Insights into the Genetic Components of Protein Abundance in Obesity
Source: Research Square preprint supplement (doi:10.21203/rs.3.rs-3975196/v1), 2024-03-04
Supplement: Supplementary file 12 [file d02e623fe97845c51faf5a94.docx]

**Supplementary Table 7b: Drug Information of Therapeutic Targets**

| **Target ID** | **Drug ID** | **Drug name** | **Highest clinical status** | **Drug-related disease** |
| --- | --- | --- | --- | --- |
| T56556 | D02ZTJ | Sulfasalazine | Approved | Rheumatoid arthritis |
| T72195 | D07FQL | Diannexin | Phase 2 | Myocardial reperfusion injury |
| T76904 | D0J1VY | Entacapone | Approved | Parkinson disease |
| D01SGK | Opicapone | Approved | Parkinson disease |
| D0Y7PG | Tolcapone | Approved | Parkinson disease |
| D0R2NE | Entacapone+levodopa+carbidopa | Phase 3 | Restless legs syndrome |
| D0G4DE | BIA 3-202 | Phase 2 | Parkinson disease |
| D0P5TR | CGP-28014 | Phase 2 | Major depressive disorder |
| D0U1CL | PGX-200097 | Preclinical | Schizophrenia |
| D0OE1R | (3,4-DIHYDROXY-2-NITROPHENYL)(PHENYL)METHANONE | Investigative | - |
| D0C0OT | 1-(3,4-dihydroxy-2-nitrophenyl)-2-phenylethanone | Investigative | - |
| D01AFH | 1-(3,4-dihydroxy-5-nitrophenyl)-2-phenoxyethanone | Investigative | - |
| D09AYR | 3,5-Dinitrocatechol | Investigative | - |
| D0HW3Y | 5,6-dihydroxy-7-nitro-2,3-dihydroinden-1-one | Investigative | - |
| D0M3PG | 6,7-dihydroxy-8-nitro-1-tetralone | Investigative | - |
| D06LED | 7,8-dihydroxy-4-phenyl-2H-chromen-2-one | Investigative | - |
| D0XT0I | BIA | Investigative | - |
| T15509 | D05LXG | RHC80267 | Investigative | - |
| T66396 | D0T5VB | WO2013110309CA127 | Investigative | - |
| T29083 | D09AID | PMID22564207C25b | Investigative | - |
| D0K5UF | PMID24432909C8e | Investigative | - |
| T89055 | D0T5DP | Selumetinib | Phase 3 | Melanoma |
| D0XW4G | Pyridic ketone derivative 1 | Patented | - |
| D9ILC1 | PD98059 | Investigative | - |
| T13928 | D05TNT | ST074946 | Investigative | - |
| T78932 | D0S1XX | Deucravacitinib | Approved | Plaque psoriasis |
| D0V4DX | PF-06700841 | Phase 2 | Asthma |
| D7TA4P | PF-06826647 | Phase 2 | Plaque psoriasis |
| D0M3XE | PF-06826647 | Phase 1 | Plaque psoriasis |
| D05AXE | Aminooxazole carboxamide derivative 1 | Patented | - |
| D0M2JK | Aminopyridine derivative 1 | Patented | - |
| D0M8YW | Aminopyrimidine derivative 5 | Patented | - |
| D09ALF | Aminotriazolopyridine derivative 1 | Patented | - |
| D01CRX | Benzimidazole derivative 7 | Patented | - |
| D01FVC | Bis-aminopyrimidine derivative 1 | Patented | - |
| D0LR6J | Bis-aminopyrimidine derivative 2 | Patented | - |
| D0S6XT | Bis-aminopyrimidine derivative 3 | Patented | - |
| D0SJ1Q | Bis-aminopyrimidine derivative 4 | Patented | - |
| D0M2OK | Bis-aminopyrimidine derivative 5 | Patented | - |
| D07PTU | Imidazo[4,5-c]pyridine derivative 1 | Patented | - |
| D0VJ1R | Imidazo[4,5-c]pyridine derivative 2 | Patented | - |
| D0IB3R | Imidazopyridine derivative 3 | Patented | - |
| D0XH7H | N-methylmethanesulfonamide derivative 1 | Patented | - |
| D0RJ3W | PMID27774822-Compound-Figure11Example5 | Patented | - |
| D0NY6M | PMID27774822-Compound-Figure3CompoundI-165 | Patented | - |
| D0C3HN | PMID27774822-Compound-Figure9Example15 | Patented | - |
| D0YR8S | PMID27774824-Compound-Figure11Example1up | Patented | - |
| D0U1HA | PMID27774824-Compound-Figure3Example18 | Patented | - |
| D0GB7G | PMID27774824-Compound-Figure6Example12 | Patented | - |
| D01DBB | PMID27774824-Compound-Figure9Example2down | Patented | - |
| D0WZ8N | PMID27774824-Compound-Figure9Example2up | Patented | - |
| D09PIS | Pyrazolo[4,3-c]pyridine derivative 2 | Patented | - |
| D03QAY | Pyrazolopyridine derivative 3 | Patented | - |
| D01GNL | Pyrazolopyridine derivative 5 | Patented | - |
| D0YJ4D | Pyrrole derivative 7 | Patented | - |
| D0FQ4Z | Pyrrolo[2,3-d]pyrimidine derivative 6 | Patented | - |
| D0U5FZ | Pyrrolo[2,3-d]pyrimidine derivative 7 | Patented | - |
| D0KL3B | Pyrrolo[2,3-d]pyrimidine derivative 8 | Patented | - |
| D0T6CY | Pyrrolo-pyridone derivative 3 | Patented | - |
| D0UG8S | Thiazolopyridine derivative 1 | Patented | - |
| D0LS1O | Tricyclic compound 11 | Patented | - |
| D0X1FD | Tricyclic heterocycle derivative 1 | Patented | - |
| D0M2WA | Tricyclic heterocycle derivative 5 | Patented | - |
| D04BOW | Tricyclic pyrrolopyridine compound 1 | Patented | - |
| D0IR6U | CMP-6 | Investigative | - |
| T16188 | D0G4CS | PMID24900237C15 | Investigative | - |
| T11843 | D05HFY | Acenocoumarol | Approved | Thrombosis |
| D02TJS | Dicumarol | Approved | Thrombosis |
| D08FTG | Phenindione | Approved | Coagulation defect |
| D0QV5T | Phenprocoumon | Approved | Thrombosis |
| D0E3OF | Warfarin | Approved | Atrial fibrillation |
| D07VIB | Tecarfarin | Phase 3 | Cerebrovascular ischaemia |

"-": Not available.
