# Supplementary material for: Human Brain Proteome-wide Association Study Provides Insights into the Genetic Components of Protein Abundance in Obesity
Source: Research Square preprint supplement (doi:10.21203/rs.3.rs-3975196/v1), 2024-03-04
Supplement: Supplementary file 13 [file f79a932ef034c35eb1a33d29.docx]

**Supplementary Table 3: Proteome-wide Significant Genes for BMI**

| **Gene** | **CHR** | **Position** | **ROSMAP (Discovery)** | | | | | | | | **BANNER (Replication)** | | | | | | | |
| --- | --- | --- | --- | --- | --- | --- | --- | --- | --- | --- | --- | --- | --- | --- | --- | --- | --- | --- |
| **HSQ** | **PWAS.Z** | **PWAS.P** | **COLOC.PP0** | **COLOC.PP1** | **COLOC.PP2** | **COLOC.PP3** | **COLOC.PP4** | **HSQ** | **PWAS.Z** | **PWAS.P** | **COLOC.PP0** | **COLOC.PP1** | **COLOC.PP2** | **COLOC.PP3** | **COLOC.PP4** |
| ***ADCY3*** | 2 | 25042038~25142708 | 0.074 | -17.257 | 9.91E-67 | 0.000 | 0.000 | 0.033 | 0.019 | 0.948 | 0.129 | -19.518 | **7.74E-85** | 0.000 | 0.000 | 0.038 | 0.010 | **0.952** |
| *DOC2A* | 16 | 30016830~30034591 | 0.062 | 13.421 | 4.53E-41 | 0.000 | 0.000 | 0.000 | 0.309 | 0.691 | - | - | - | - | - | - | - | - |
| ***SULT1A1*** | 16 | 28616903~28634946 | 0.361 | -13.013 | 1.03E-38 | 0.000 | 0.000 | 0.000 | 0.054 | 0.946 | 0.297 | -14.854 | **6.58E-50** | 0.000 | 0.000 | 0.000 | 0.086 | **0.914** |
| *MON1A* | 3 | 49946302~49967606 | 0.020 | -11.719 | 1.02E-31 | 0.000 | 0.000 | 0.509 | 0.046 | 0.445 | - | - | - | - | - | - | - | - |
| *LMOD1* | 1 | 201865580~201915715 | 0.049 | -11.170 | 5.73E-29 | 0.000 | 0.000 | 0.077 | 0.014 | 0.908 | 0.306 | -8.674 | 4.18E-18 | 0.000 | 0.000 | 0.310 | 0.164 | 0.526 |
| ***CNNM2*** | 10 | 104678050~104849978 | 0.145 | 10.230 | 1.46E-24 | 0.000 | 0.000 | 0.000 | 0.012 | 0.988 | 0.368 | 9.606 | **7.58E-22** | 0.000 | 0.000 | 0.000 | 0.013 | **0.987** |
| ***VKORC1*** | 16 | 31102163~31107301 | 0.064 | -9.588 | 9.00E-22 | 0.000 | 0.000 | 0.078 | 0.023 | 0.899 | 0.053 | -11.537 | **8.61E-31** | 0.000 | 0.000 | 0.100 | 0.018 | **0.882** |
| ***MAP2K2*** | 19 | 4090319~4124126 | 0.048 | -9.292 | 1.51E-20 | 0.000 | 0.000 | 0.046 | 0.005 | 0.950 | 0.137 | -8.247 | **1.62E-16** | 0.000 | 0.000 | 0.056 | 0.096 | **0.848** |
| *HSD17B12* | 11 | 43577986~43878167 | 0.325 | -8.481 | 2.24E-17 | 0.000 | 0.000 | 0.000 | 1.000 | 0.000 | - | - | - | - | - | - | - | - |
| *MADD* | 11 | 47290712~47351582 | 0.368 | 8.178 | 2.89E-16 | 0.000 | 0.000 | 0.000 | 1.000 | 0.000 | - | - | - | - | - | - | - | - |
| ***PLCB3*** | 11 | 64018995~64036622 | 0.048 | -8.144 | 3.83E-16 | 0.000 | 0.000 | 0.010 | 0.010 | 0.980 | 0.067 | -5.595 | **2.21E-08** | 0.000 | 0.000 | 0.093 | 0.043 | **0.864** |
| *TRAF3* | 14 | 103243813~103377837 | 0.087 | 8.125 | 4.46E-16 | 0.000 | 0.000 | 0.000 | 0.001 | 0.999 | 0.227 | 3.746 | 1.80E-04 | 0.000 | 0.000 | 0.332 | 0.068 | 0.601 |
| *ADCY9* | 16 | 4003388~4166186 | 0.076 | -7.844 | 4.38E-15 | 0.000 | 0.000 | 0.116 | 0.271 | 0.613 | - | - | - | - | - | - | - | - |
| ***GPX1*** | 3 | 49394609~49396033 | 0.423 | 7.769 | 7.93E-15 | 0.000 | 0.000 | 0.000 | 0.008 | 0.992 | 0.527 | 8.035 | **9.32E-16** | 0.000 | 0.000 | 0.000 | 0.008 | **0.992** |
| *AK5* | 1 | 77747736~78025651 | 0.122 | -7.549 | 4.38E-14 | 0.000 | 0.000 | 0.000 | 1.000 | 0.000 | - | - | - | - | - | - | - | - |
| *SNX32* | 11 | 65601112~65624367 | 0.285 | 7.491 | 6.82E-14 | 0.000 | 0.000 | 0.000 | 1.000 | 0.000 | - | - | - | - | - | - | - | - |
| *ASPHD1* | 16 | 29911696~29931185 | 0.300 | 7.426 | 1.12E-13 | 0.000 | 0.000 | 0.000 | 1.000 | 0.000 | - | - | - | - | - | - | - | - |
| ***ABCG2*** | 4 | 89011416~89152474 | 0.143 | 7.415 | 1.22E-13 | 0.000 | 0.000 | 0.000 | 0.002 | 0.998 | 0.575 | 7.217 | **5.31E-13** | 0.000 | 0.000 | 0.000 | 0.002 | **0.998** |
| *FTO* | 16 | 53737875~54155853 | 0.131 | 7.317 | 2.53E-13 | 0.000 | 0.000 | 0.574 | 0.401 | 0.024 | - | - | - | - | - | - | - | - |
| *CRTAC1* | 10 | 99624757~99790585 | 0.153 | -7.202 | 5.91E-13 | 0.000 | 0.000 | 0.003 | 0.943 | 0.055 | - | - | - | - | - | - | - | - |
| ***RAB27B*** | 18 | 52385091~52562747 | 0.162 | -7.199 | 6.08E-13 | 0.000 | 0.000 | 0.000 | 0.012 | 0.988 | 0.105 | -7.524 | **5.30E-14** | 0.000 | 0.000 | 0.028 | 0.013 | **0.960** |
| *PPTC7* | 12 | 110969120~111021125 | 0.044 | -7.146 | 8.95E-13 | 0.000 | 0.000 | 0.014 | 0.070 | 0.916 | - | - | - | - | - | - | - | - |
| *RASGRF1* | 15 | 79252289~79383115 | 0.032 | 7.103 | 1.22E-12 | 0.000 | 0.000 | 0.031 | 0.006 | 0.962 | - | - | - | - | - | - | - | - |
| *RASA2* | 3 | 141205889~141334184 | 0.095 | 7.073 | 1.52E-12 | 0.000 | 0.000 | 0.000 | 0.004 | 0.996 | 0.117 | 3.228 | 1.24E-03 | 0.000 | 0.000 | 0.313 | 0.066 | 0.621 |
| *NAV1* | 1 | 201592411~201796102 | 0.059 | -7.050 | 1.79E-12 | 0.000 | 0.000 | 0.861 | 0.065 | 0.074 | - | - | - | - | - | - | - | - |
| ***PANK4*** | 1 | 2439972~2458039 | 0.087 | 6.843 | 7.77E-12 | 0.000 | 0.000 | 0.000 | 0.006 | 0.994 | 0.421 | 7.489 | **6.92E-14** | 0.000 | 0.000 | 0.000 | 0.000 | **1.000** |
| *CDC42BPB* | 14 | 103398716~103523799 | 0.065 | 6.794 | 1.09E-11 | 0.000 | 0.000 | 0.211 | 0.538 | 0.251 | - | - | - | - | - | - | - | - |
| *CCDC92* | 12 | 124403207~124457378 | 0.064 | -6.672 | 2.52E-11 | 0.000 | 0.000 | 0.000 | 0.037 | 0.963 | 0.450 | -5.523 | 3.32E-08 | 0.000 | 0.000 | 0.000 | 0.242 | 0.758 |
| *HIP1R* | 12 | 123319000~123347507 | 0.198 | -6.666 | 2.64E-11 | 0.000 | 0.000 | 0.000 | 0.000 | 1.000 | 0.079 | -5.760 | 8.43E-09 | 0.000 | 0.000 | 0.864 | 0.022 | 0.114 |
| ***ADPGK*** | 15 | 73043710~73078187 | 0.103 | 6.624 | 3.49E-11 | 0.000 | 0.000 | 0.007 | 0.176 | 0.817 | 0.120 | 7.720 | **1.16E-14** | 0.000 | 0.000 | 0.118 | 0.017 | **0.865** |
| *GNB1* | 1 | 1716729~1822495 | 0.035 | -6.477 | 9.38E-11 | 0.000 | 0.000 | 0.233 | 0.023 | 0.745 | - | - | - | - | - | - | - | - |
| *SLC7A6* | 16 | 68298433~68335722 | 0.053 | -6.387 | 1.69E-10 | 0.000 | 0.000 | 0.176 | 0.010 | 0.814 | - | - | - | - | - | - | - | - |
| ***SLC25A12*** | 2 | 172640880~172864766 | 0.104 | -6.384 | 1.72E-10 | 0.000 | 0.000 | 0.000 | 0.031 | 0.969 | 0.126 | -5.553 | **2.81E-08** | 0.000 | 0.000 | 0.030 | 0.032 | **0.939** |
| *UBQLN4* | 1 | 156005092~156023585 | 0.040 | 6.305 | 2.88E-10 | 0.000 | 0.000 | 0.017 | 0.006 | 0.977 | - | - | - | - | - | - | - | - |
| *RABEP1* | 17 | 5185558~5289129 | 0.107 | 6.294 | 3.10E-10 | 0.000 | 0.000 | 0.000 | 0.999 | 0.001 | - | - | - | - | - | - | - | - |
| *NEK4* | 3 | 52744800~52804965 | 0.088 | -6.243 | 4.29E-10 | 0.000 | 0.000 | 0.000 | 0.999 | 0.001 | - | - | - | - | - | - | - | - |
| *CPNE3* | 8 | 87497059~87573726 | 0.147 | -6.235 | 4.51E-10 | 0.000 | 0.000 | 0.000 | 0.004 | 0.996 | 0.157 | -4.207 | 2.58E-05 | 0.001 | 0.000 | 0.646 | 0.063 | 0.290 |
| ***DPYSL4*** | 10 | 134000404~134019280 | 0.121 | 6.232 | 4.60E-10 | 0.000 | 0.000 | 0.000 | 0.001 | 0.999 | 0.157 | 7.099 | **1.26E-12** | 0.000 | 0.000 | 0.010 | 0.019 | **0.971** |
| *BCL2L13* | 22 | 18111621~18213388 | 0.204 | -6.200 | 5.64E-10 | 0.000 | 0.000 | 0.000 | 0.040 | 0.960 | 0.218 | -1.087 | 2.77E-01 | - | - | - | - | - |
| *TUBA4A* | 2 | 220114433~220142892 | 0.024 | 6.197 | 5.75E-10 | 0.000 | 0.000 | 0.343 | 0.037 | 0.620 | - | - | - | - | - | - | - | - |
| *NASP* | 1 | 46049518~46084566 | 0.031 | 6.118 | 9.45E-10 | 0.000 | 0.000 | 0.007 | 0.040 | 0.953 | - | - | - | - | - | - | - | - |
| *SKIV2L* | 6 | 31926857~31937532 | 0.103 | 6.066 | 1.31E-09 | 0.000 | 0.000 | 0.015 | 0.011 | 0.975 | - | - | - | - | - | - | - | - |
| *PLCL1* | 2 | 198669426~199437305 | 0.065 | -5.980 | 2.23E-09 | 0.000 | 0.000 | 0.008 | 0.912 | 0.081 | - | - | - | - | - | - | - | - |
| *PHF3* | 6 | 64345725~64489229 | 0.052 | 5.970 | 2.38E-09 | 0.005 | 0.000 | 0.118 | 0.004 | 0.873 | - | - | - | - | - | - | - | - |
| *PDE2A* | 11 | 72287185~72385635 | 0.067 | -5.935 | 2.94E-09 | 0.000 | 0.000 | 0.058 | 0.005 | 0.937 | - | - | - | - | - | - | - | - |
| ***ULK3*** | 15 | 75128457~75135687 | 0.347 | -5.923 | 3.15E-09 | 0.000 | 0.000 | 0.000 | 0.001 | 0.999 | 0.472 | -5.838 | **5.30E-09** | 0.000 | 0.000 | 0.000 | 0.002 | **0.998** |
| *APMAP* | 20 | 24943561~24973615 | 0.038 | 5.894 | 3.78E-09 | 0.000 | 0.000 | 0.316 | 0.408 | 0.276 | - | - | - | - | - | - | - | - |
| *NAT6* | 3 | 50333833~50336852 | 0.097 | 5.880 | 4.10E-09 | 0.000 | 0.000 | 0.001 | 0.976 | 0.023 | - | - | - | - | - | - | - | - |
| *LYZ* | 12 | 69742121~69748014 | 0.034 | 5.852 | 4.85E-09 | 0.000 | 0.000 | 0.371 | 0.117 | 0.511 | - | - | - | - | - | - | - | - |
| *SNX19* | 11 | 130745331~130786404 | 0.095 | 5.838 | 5.29E-09 | 0.000 | 0.000 | 0.003 | 0.994 | 0.004 | - | - | - | - | - | - | - | - |
| *SRR* | 17 | 2206677~2228554 | 0.211 | 5.778 | 7.56E-09 | 0.000 | 0.000 | 0.000 | 1.000 | 0.000 | - | - | - | - | - | - | - | - |
| *ZFYVE1* | 14 | 73436159~73493920 | 0.033 | -5.766 | 8.12E-09 | 0.000 | 0.000 | 0.019 | 0.003 | 0.978 | - | - | - | - | - | - | - | - |
| *ACP1* | 2 | 264140~278283 | 0.381 | 5.756 | 8.59E-09 | 0.000 | 0.000 | 0.000 | 0.989 | 0.011 | - | - | - | - | - | - | - | - |
| *FAM114A2* | 5 | 153369688~153418496 | 0.102 | 5.755 | 8.68E-09 | 0.000 | 0.000 | 0.000 | 0.999 | 0.001 | - | - | - | - | - | - | - | - |
| *SLC9A3R2* | 16 | 2075357~2089027 | 0.094 | 5.707 | 1.15E-08 | 0.000 | 0.000 | 0.048 | 0.110 | 0.843 | - | - | - | - | - | - | - | - |
| ***ARL3*** | 10 | 104433488~104474164 | 0.097 | -5.678 | 1.36E-08 | 0.000 | 0.000 | 0.000 | 0.011 | 0.988 | 0.243 | -4.763 | **1.91E-06** | 0.000 | 0.000 | 0.000 | 0.030 | **0.970** |
| ***COMT*** | 22 | 19929130~19957498 | 0.421 | -5.659 | 1.53E-08 | 0.000 | 0.000 | 0.000 | 0.002 | 0.998 | 0.606 | -5.720 | **1.06E-08** | 0.000 | 0.000 | 0.000 | 0.002 | **0.998** |
| ***C3orf18*** | 3 | 50595462~50608458 | 0.058 | -5.650 | 1.60E-08 | 0.000 | 0.000 | 0.001 | 0.029 | 0.970 | 0.292 | -4.819 | **1.44E-06** | 0.000 | 0.000 | 0.000 | 0.048 | **0.951** |
| *SCYL1* | 11 | 65292548~65306175 | 0.043 | 5.645 | 1.65E-08 | 0.000 | 0.000 | 0.121 | 0.014 | 0.865 | - | - | - | - | - | - | - | - |
| *CADPS2* | 7 | 121958481~122526813 | 0.057 | 5.633 | 1.77E-08 | 0.000 | 0.000 | 0.746 | 0.061 | 0.193 | - | - | - | - | - | - | - | - |
| *SACM1L* | 3 | 45730548~45786916 | 0.061 | 5.581 | 2.39E-08 | 0.340 | 0.018 | 0.173 | 0.009 | 0.461 | - | - | - | - | - | - | - | - |
| *MRAS* | 3 | 138066539~138124375 | 0.104 | -5.579 | 2.42E-08 | 0.000 | 0.000 | 0.000 | 0.011 | 0.989 | - | - | - | - | - | - | - | - |
| *BCS1L* | 2 | 219523487~219528166 | 0.082 | -5.549 | 2.87E-08 | 0.000 | 0.000 | 0.100 | 0.071 | 0.829 | 0.120 | -3.142 | 1.68E-03 | 0.000 | 0.000 | 0.755 | 0.024 | 0.221 |
| *ADK* | 10 | 75910960~76469061 | 0.103 | 5.546 | 2.92E-08 | 0.000 | 0.000 | 0.000 | 0.996 | 0.004 | - | - | - | - | - | - | - | - |
| ***SPRYD4*** | 12 | 56862301~56864763 | 0.177 | -5.510 | 3.59E-08 | 0.000 | 0.001 | 0.000 | 0.002 | 0.997 | 0.126 | -5.107 | **3.27E-07** | 0.003 | 0.002 | 0.015 | 0.006 | **0.975** |
| *TRMT61B* | 2 | 29072687~29093167 | 0.249 | 5.468 | 4.55E-08 | 0.000 | 0.000 | 0.000 | 0.976 | 0.024 | - | - | - | - | - | - | - | - |
| *COPS7B* | 2 | 232646381~232673963 | 0.028 | 5.400 | 6.68E-08 | 0.006 | 0.001 | 0.123 | 0.016 | 0.854 | - | - | - | - | - | - | - | - |
| *ISLR2* | 15 | 74392652~74430881 | 0.110 | -5.380 | 7.47E-08 | 0.027 | 0.043 | 0.133 | 0.213 | 0.584 | - | - | - | - | - | - | - | - |
| *PCYT1A* | 3 | 195941093~196014828 | 0.087 | 5.370 | 7.86E-08 | 0.000 | 0.006 | 0.011 | 0.215 | 0.767 | - | - | - | - | - | - | - | - |
| *MPPED2* | 11 | 30406040~30608419 | 0.091 | -5.350 | 8.81E-08 | 0.000 | 0.000 | 0.292 | 0.058 | 0.650 | - | - | - | - | - | - | - | - |
| *SERGEF* | 11 | 17809595~18034709 | 0.249 | 5.340 | 9.32E-08 | 0.000 | 0.824 | 0.000 | 0.030 | 0.146 | - | - | - | - | - | - | - | - |
| *PNPO* | 17 | 46018872~46025654 | 0.725 | 5.302 | 1.14E-07 | 0.000 | 0.000 | 0.000 | 1.000 | 0.000 | - | - | - | - | - | - | - | - |
| *ELP3* | 8 | 27947190~28048673 | 0.033 | 5.276 | 1.32E-07 | 0.000 | 0.000 | 0.155 | 0.014 | 0.831 | 0.147 | 4.157 | 3.23E-05 | 0.000 | 0.000 | 0.516 | 0.290 | 0.194 |
| *ITGAM* | 16 | 31271311~31344213 | 0.025 | -5.274 | 1.33E-07 | 0.000 | 0.000 | 0.236 | 0.548 | 0.216 | - | - | - | - | - | - | - | - |
| *AARS* | 16 | 70286198~70323446 | 0.038 | 5.179 | 2.23E-07 | 0.000 | 0.000 | 0.273 | 0.006 | 0.721 | - | - | - | - | - | - | - | - |
| *CISD2* | 4 | 103790135~103810399 | 0.083 | 5.179 | 2.24E-07 | 0.000 | 0.018 | 0.000 | 0.435 | 0.547 | - | - | - | - | - | - | - | - |
| *RAB23* | 6 | 57053607~57087078 | 0.066 | 5.151 | 2.59E-07 | 0.075 | 0.270 | 0.013 | 0.045 | 0.596 | - | - | - | - | - | - | - | - |
| *OLA1* | 2 | 174937175~175113426 | 0.071 | 5.139 | 2.76E-07 | 0.000 | 0.000 | 0.002 | 0.040 | 0.958 | - | - | - | - | - | - | - | - |
| ***SENP8*** | 15 | 72406599~72433311 | 0.126 | 5.117 | 3.10E-07 | 0.000 | 0.000 | 0.000 | 0.019 | 0.981 | 0.647 | 6.163 | **7.16E-10** | 0.000 | 0.000 | 0.047 | 0.016 | **0.937** |
| *RFT1* | 3 | 53122499~53164478 | 0.145 | -5.115 | 3.14E-07 | 0.000 | 0.000 | 0.000 | 1.000 | 0.000 | - | - | - | - | - | - | - | - |
| *CSE1L* | 20 | 47662849~47713489 | 0.123 | 5.107 | 3.27E-07 | 0.000 | 0.000 | 0.000 | 0.006 | 0.994 | 0.162 | 3.367 | 7.61E-04 | 0.000 | 0.000 | 0.037 | 0.411 | 0.552 |
| *TTC19* | 17 | 15902694~15948329 | 0.033 | 5.106 | 3.29E-07 | 0.000 | 0.000 | 0.198 | 0.100 | 0.702 | - | - | - | - | - | - | - | - |
| *ERAP1* | 5 | 96096521~96143803 | 0.571 | -5.088 | 3.62E-07 | 0.000 | 0.001 | 0.000 | 0.903 | 0.096 | - | - | - | - | - | - | - | - |
| *RAB5B* | 12 | 56367697~56388490 | 0.031 | 4.985 | 6.21E-07 | 0.000 | 0.000 | 0.833 | 0.058 | 0.109 | - | - | - | - | - | - | - | - |
| *GNAQ* | 9 | 80331003~80646374 | 0.037 | 4.983 | 6.26E-07 | 0.000 | 0.003 | 0.028 | 0.818 | 0.151 | - | - | - | - | - | - | - | - |
| *VPS13C* | 15 | 62144588~62352672 | 0.184 | 4.979 | 6.38E-07 | 0.000 | 0.000 | 0.000 | 0.014 | 0.986 | 0.068 | -0.331 | 7.40E-01 | - | - | - | - | - |
| *ACOT13* | 6 | 24667263~24705293 | 0.052 | -4.964 | 6.90E-07 | 0.152 | 0.016 | 0.646 | 0.068 | 0.118 | - | - | - | - | - | - | - | - |
| *COQ6* | 14 | 74416629~74430373 | 0.101 | 4.946 | 7.60E-07 | 0.000 | 0.081 | 0.000 | 0.026 | 0.893 | - | - | - | - | - | - | - | - |
| ***NDUFAF1*** | 15 | 41679551~41694717 | 0.261 | -4.927 | 8.36E-07 | 0.000 | 0.005 | 0.000 | 0.026 | 0.969 | 0.414 | -4.652 | **3.29E-06** | 0.000 | 0.003 | 0.002 | 0.017 | **0.977** |
| *CHORDC1* | 11 | 89934328~89956532 | 0.080 | -4.921 | 8.62E-07 | 0.000 | 0.000 | 0.039 | 0.008 | 0.953 | - | - | - | - | - | - | - | - |
| ***HINT1*** | 5 | 130494720~130507428 | 0.064 | -4.903 | 9.46E-07 | 0.000 | 0.001 | 0.000 | 0.015 | 0.985 | 0.160 | -4.807 | **1.53E-06** | 0.000 | 0.000 | 0.000 | 0.009 | **0.991** |
| *MACF1* | 1 | 39546988~39952849 | 0.052 | 4.899 | 9.65E-07 | 0.000 | 0.000 | 0.297 | 0.685 | 0.018 | - | - | - | - | - | - | - | - |
| ***TYK2*** | 19 | 10461209~10491352 | 0.429 | -4.863 | 1.16E-06 | 0.000 | 0.019 | 0.000 | 0.000 | 0.981 | 0.483 | -3.985 | **6.74E-05** | 0.001 | 0.019 | 0.000 | 0.001 | **0.980** |
| *AP2A2* | 11 | 924894~1012239 | 0.143 | 4.858 | 1.19E-06 | 0.000 | 0.000 | 0.778 | 0.060 | 0.162 | - | - | - | - | - | - | - | - |
| *SYNM* | 15 | 99638420~99675798 | 0.107 | -4.856 | 1.20E-06 | 0.001 | 0.508 | 0.001 | 0.373 | 0.118 | - | - | - | - | - | - | - | - |
| *PSMG1* | 21 | 40546695~40555777 | 0.032 | 4.855 | 1.20E-06 | 0.001 | 0.000 | 0.105 | 0.029 | 0.866 | - | - | - | - | - | - | - | - |
| *FAM69A* | 1 | 93307724~93427057 | 0.040 | 4.789 | 1.68E-06 | 0.000 | 0.000 | 0.308 | 0.025 | 0.667 | - | - | - | - | - | - | - | - |
| *MON1B* | 16 | 77224732~77236302 | 0.067 | -4.786 | 1.70E-06 | 0.058 | 0.012 | 0.251 | 0.052 | 0.627 | - | - | - | - | - | - | - | - |
| *DDAH2* | 6 | 31694815~31698394 | 0.222 | -4.782 | 1.74E-06 | 0.000 | 0.007 | 0.000 | 0.031 | 0.962 | - | - | - | - | - | - | - | - |
| *XYLB* | 3 | 38388251~38462839 | 0.045 | -4.768 | 1.86E-06 | 0.004 | 0.001 | 0.103 | 0.039 | 0.852 | - | - | - | - | - | - | - | - |
| ***PIP4K2A*** | 10 | 22823778~23003484 | 0.303 | -4.767 | 1.87E-06 | 0.000 | 0.022 | 0.000 | 0.063 | 0.916 | 0.466 | -3.249 | **1.16E-03** | 0.000 | 0.032 | 0.000 | 0.095 | **0.873** |
| *DNM1* | 9 | 130965658~131017527 | 0.033 | 4.761 | 1.93E-06 | 0.000 | 0.000 | 0.712 | 0.176 | 0.112 | - | - | - | - | - | - | - | - |
| *HARS2* | 5 | 140071011~140078889 | 0.027 | -4.746 | 2.08E-06 | 0.044 | 0.006 | 0.192 | 0.025 | 0.732 | - | - | - | - | - | - | - | - |
| *TYW5* | 2 | 200794698~200820459 | 0.025 | 4.724 | 2.31E-06 | 0.021 | 0.005 | 0.100 | 0.022 | 0.852 | - | - | - | - | - | - | - | - |
| *LEMD2* | 6 | 33738979~33756913 | 0.074 | -4.720 | 2.36E-06 | 0.000 | 0.000 | 0.001 | 0.308 | 0.692 | - | - | - | - | - | - | - | - |
| *PAM* | 5 | 102089685~102366809 | 0.048 | 4.711 | 2.47E-06 | 0.001 | 0.000 | 0.895 | 0.070 | 0.033 | - | - | - | - | - | - | - | - |
| *TRAP1* | 16 | 3701640~3767598 | 0.206 | -4.704 | 2.56E-06 | 0.000 | 0.000 | 0.000 | 1.000 | 0.000 | - | - | - | - | - | - | - | - |
| *LYRM4* | 6 | 5102827~5261172 | 0.336 | 4.683 | 2.83E-06 | 0.000 | 0.103 | 0.000 | 0.007 | 0.890 | 0.275 | 4.301 | 1.70E-05 | 0.020 | 0.193 | 0.002 | 0.013 | 0.772 |
| *TPD52L2* | 20 | 62496596~62522898 | 0.049 | 4.682 | 2.84E-06 | 0.006 | 0.002 | 0.032 | 0.011 | 0.950 | - | - | - | - | - | - | - | - |
| *WBP2* | 17 | 73841780~73852588 | 0.062 | -4.663 | 3.12E-06 | 0.000 | 0.001 | 0.138 | 0.645 | 0.216 | - | - | - | - | - | - | - | - |
| *KCTD5* | 16 | 2732476~2759031 | 0.087 | -4.646 | 3.39E-06 | 0.860 | 0.065 | 0.048 | 0.004 | 0.024 | - | - | - | - | - | - | - | - |
| *ABHD12* | 20 | 25275379~25371619 | 0.396 | 4.643 | 3.44E-06 | 0.000 | 0.000 | 0.000 | 1.000 | 0.000 | - | - | - | - | - | - | - | - |
| *EML2* | 19 | 46110252~46148887 | 0.104 | -4.621 | 3.82E-06 | 0.000 | 0.000 | 0.000 | 1.000 | 0.000 | - | - | - | - | - | - | - | - |
| *AAK1* | 2 | 69688532~69901481 | 0.056 | -4.620 | 3.83E-06 | 0.000 | 0.000 | 0.046 | 0.033 | 0.921 | 0.086 | -1.668 | 9.54E-02 | - | - | - | - | - |
| *ANKRD29* | 18 | 21178890~21242849 | 0.054 | 4.615 | 3.94E-06 | 0.000 | 0.000 | 0.660 | 0.119 | 0.221 | - | - | - | - | - | - | - | - |
| *CTSF* | 11 | 66330934~66336312 | 0.039 | -4.586 | 4.52E-06 | 0.666 | 0.052 | 0.147 | 0.011 | 0.124 | - | - | - | - | - | - | - | - |
| *RWDD1* | 6 | 116892530~116918838 | 0.065 | -4.585 | 4.54E-06 | 0.000 | 0.089 | 0.000 | 0.005 | 0.906 | - | - | - | - | - | - | - | - |
| *UHRF1BP1* | 6 | 34759857~34850915 | 0.171 | -4.582 | 4.60E-06 | 0.000 | 0.000 | 0.018 | 0.982 | 0.001 | - | - | - | - | - | - | - | - |
| *GRID1* | 10 | 87359312~88126250 | 0.208 | -4.573 | 4.81E-06 | 0.000 | 0.000 | 0.000 | 1.000 | 0.000 | - | - | - | - | - | - | - | - |
| *DHRS7B* | 17 | 21026677~21096578 | 0.065 | -4.553 | 5.29E-06 | 0.000 | 0.000 | 0.029 | 0.968 | 0.003 | - | - | - | - | - | - | - | - |
| *RCN1* | 11 | 31833939~32127301 | 0.078 | -4.550 | 5.36E-06 | 0.000 | 0.001 | 0.000 | 0.965 | 0.034 | - | - | - | - | - | - | - | - |
| *IFT27* | 22 | 37154246~37172300 | 0.145 | -4.546 | 5.48E-06 | 0.000 | 0.190 | 0.000 | 0.067 | 0.742 | - | - | - | - | - | - | - | - |
| ***GBA2*** | 9 | 35736863~35749983 | 0.279 | 4.543 | 5.55E-06 | 0.000 | 0.048 | 0.000 | 0.026 | 0.927 | 0.409 | 4.251 | **2.13E-05** | 0.000 | 0.062 | 0.000 | 0.034 | **0.905** |
| *ICA1L* | 2 | 203640690~203736708 | 0.151 | -4.506 | 6.60E-06 | 0.000 | 0.000 | 0.000 | 1.000 | 0.000 | - | - | - | - | - | - | - | - |
| *MKRN2* | 3 | 12598513~12625212 | 0.180 | 4.488 | 7.20E-06 | 0.002 | 0.433 | 0.000 | 0.001 | 0.563 | - | - | - | - | - | - | - | - |
| ***TMEM106B*** | 7 | 12250867~12282993 | 0.238 | -4.441 | 8.97E-06 | 0.000 | 0.177 | 0.000 | 0.013 | 0.810 | 0.273 | -4.021 | **5.81E-05** | 0.000 | 0.097 | 0.000 | 0.007 | **0.895** |
| *TRIM65* | 17 | 73876416~73893084 | 0.193 | 4.420 | 9.89E-06 | 0.000 | 0.000 | 0.000 | 0.037 | 0.963 | - | - | - | - | - | - | - | - |
| *PPCDC* | 15 | 75315896~75409803 | 0.071 | -4.420 | 9.89E-06 | 0.002 | 0.002 | 0.012 | 0.009 | 0.974 | - | - | - | - | - | - | - | - |
| *RUFY1* | 5 | 178977559~179037027 | 0.092 | 4.414 | 1.01E-05 | 0.281 | 0.495 | 0.003 | 0.005 | 0.215 | - | - | - | - | - | - | - | - |
| *NUDCD3* | 7 | 44418720~44530479 | 0.093 | 4.409 | 1.04E-05 | 0.000 | 0.013 | 0.000 | 0.163 | 0.823 | 0.168 | 3.660 | 2.52E-04 | 0.001 | 0.045 | 0.014 | 0.551 | 0.389 |
| *DLG1* | 3 | 196769431~197026171 | 0.214 | -4.401 | 1.08E-05 | 0.002 | 0.901 | 0.000 | 0.029 | 0.068 | - | - | - | - | - | - | - | - |
| *PTPLB* | 3 | 123209667~123304032 | 0.052 | 4.399 | 1.09E-05 | 0.000 | 0.000 | 0.059 | 0.308 | 0.632 | - | - | - | - | - | - | - | - |
| *KIF21B* | 1 | 200938520~200992828 | 0.258 | 4.399 | 1.09E-05 | 0.000 | 0.343 | 0.000 | 0.002 | 0.655 | - | - | - | - | - | - | - | - |
| ***PSMD9*** | 12 | 122326637~122356203 | 0.177 | 4.370 | 1.24E-05 | 0.000 | 0.003 | 0.000 | 0.009 | 0.988 | 0.193 | 5.173 | **2.31E-07** | 0.000 | 0.003 | 0.000 | 0.012 | **0.984** |
| *ERO1L* | 14 | 53106634~53162618 | 0.033 | -4.353 | 1.34E-05 | 0.069 | 0.010 | 0.079 | 0.010 | 0.832 | - | - | - | - | - | - | - | - |
| *SLC30A9* | 4 | 41992489~42092474 | 0.125 | 4.332 | 1.48E-05 | 0.185 | 0.595 | 0.011 | 0.034 | 0.176 | - | - | - | - | - | - | - | - |
| *ACE* | 17 | 61554422~61599205 | 0.098 | 4.330 | 1.49E-05 | 0.000 | 0.000 | 0.002 | 0.998 | 0.000 | - | - | - | - | - | - | - | - |
| *ABCB6* | 2 | 220074490~220083712 | 0.040 | -4.328 | 1.51E-05 | 0.000 | 0.000 | 0.447 | 0.299 | 0.253 | - | - | - | - | - | - | - | - |
| *STAT6* | 12 | 57489191~57525922 | 0.137 | 4.328 | 1.51E-05 | 0.000 | 0.037 | 0.000 | 0.006 | 0.957 | 0.217 | 1.989 | 4.67E-02 | 0.457 | 0.171 | 0.079 | 0.029 | 0.264 |
| *CAPRIN1* | 11 | 34073230~34122703 | 0.055 | -4.321 | 1.55E-05 | 0.939 | 0.020 | 0.023 | 0.000 | 0.017 | - | - | - | - | - | - | - | - |
| ***ACTR1B*** | 2 | 98272431~98280570 | 0.514 | -4.315 | 1.60E-05 | 0.000 | 0.009 | 0.000 | 0.003 | 0.988 | 0.358 | -4.843 | **1.28E-06** | 0.005 | 0.009 | 0.002 | 0.003 | **0.981** |
| *DSTYK* | 1 | 205111632~205180727 | 0.044 | -4.310 | 1.63E-05 | 0.489 | 0.184 | 0.016 | 0.006 | 0.305 | - | - | - | - | - | - | - | - |
| *FDX1L* | 19 | 10416103~10426691 | 0.190 | -4.268 | 1.97E-05 | 0.000 | 0.019 | 0.000 | 0.000 | 0.981 | 0.229 | -2.772 | 5.58E-03 | 0.785 | 0.089 | 0.065 | 0.007 | 0.055 |
| *EVI5* | 1 | 92974253~93257961 | 0.039 | 4.230 | 2.34E-05 | 0.000 | 0.000 | 0.427 | 0.055 | 0.517 | - | - | - | - | - | - | - | - |
| *TRPM3* | 9 | 73143979~74061820 | 0.143 | 4.228 | 2.36E-05 | 0.000 | 0.000 | 0.044 | 0.548 | 0.408 | - | - | - | - | - | - | - | - |
| *CHMP3* | 2 | 86730554~86948245 | 0.031 | -4.227 | 2.37E-05 | 0.000 | 0.000 | 0.675 | 0.128 | 0.197 | - | - | - | - | - | - | - | - |
| *RWDD2B* | 21 | 30376705~30391699 | 0.329 | -4.205 | 2.61E-05 | 0.000 | 0.034 | 0.000 | 0.866 | 0.100 | - | - | - | - | - | - | - | - |

HSQ: Heritability of the gene; "-": The brain protein-coding gene is not available in the replication cohort. The bonferroni correction threshold for discovery cohort is P < 0.05/1751 = 2.856 × 10-5. The bonferroni correction threshold for replication cohort is P < 0.05/43 = 1.163 × 10-3. The bolded genes represent the successfully replicated brain protein-coding genes.
